# Supplementary material for: Protein kinase CK2α’ as a dual modulator of neuroimmune signaling and synaptic dysfunction in Tauopathy
Source: Research Square preprint supplement (doi:10.21203/rs.3.rs-7078069/v1), 2025-08-07
Supplement: Supplementary file 3 [file ca7451c8c92dd2907ee6c463.xlsx]

## Sheet: Module statistics
				Wilcox rank order test (p-value)
Module Name	Module Number	Number of genes	Kruskal Test (p-value)	WT vs PS19	WT vs PS19;CK2α’(+/-)	PS19;CK2α’(+/-) vs PS19
Lightcyan	1	119	0.0519756	0.589569	0.5	0.698413
Royalblue	2	94	0.00567192	0.0952381	0.0714286	0.785714
Brown	3	533	0.0539701	0.666667	0.666667	0.857143
Red	4	372	0.0465982	0.489796	0.489796	0.698413
Darkgreen	5	74	0.170365	0.47619	0.685714	0.885714
pink	6	281	0.123528	0.589569	0.607143	0.589569
skyblue	7	50	0.040774	0.285714	0.4	0.857143
tan	8	215	0.0157881	0.114286	0.25	0.114286
violet	9	41	0.0921029	0.904762	0.5	0.285714
lightgreen	10	105	0.103441	0.416667	0.285714	0.416667
turquoise	11	2765	0.00408496	0.0952381	0.0714286	0.857143
darkturquoise	12	71	0.08718	0.228571	0.228571	1
yellow	13	410	0.401641	0.571429	0.285714	1
greenyellow	14	232	0.404847	1	0.857143	0.857143
orange	15	58	0.253145	0.904762	0.571429	0.8
paleturquoise	16	48	0.379125	1	1	1
steelblue	17	49	0.310364	1	1	1
salmon	18	198	0.305858	0.8	0.984127	0.857143
darkgrey	19	69	0.725074	1	1	1
midnightblue	20	128	0.500452	0.885714	0.885714	0.885714
cyan	21	169	0.301356	0.857143	0.809524	0.809524
saddlebrown	22	49	0.134336	1	0.625	1
blue	23	1987	0.46227	1	0.825397	0.857143
green	24	378	0.456983	0.589569	0.589569	0.785714
white	25	57	0.0893708	0.984127	0.228571	0.228571
grey60	26	108	0.157932	0.571429	0.31746	0.666667
lightyellow	27	96	0.0278621	0.15873	0.142857	0.380952
darkorange	28	58	0.0519756	0.190476	0.904762	0.190476
purple	29	273	0.0526841	0.698413	0.285714	0.285714
darkolivegreen	30	33	0.648733	1	1	1
darkred	31	87	0.416612	0.811287	0.811287	0.811287
black	32	283	0.0331398	0.285714	0.5	0.5
magenta	33	277	0.195865	0.811287	0.811287	0.714286
grey	34	5667	0.565264	1	1	1

## Sheet: Module genes
EnsemblID	ModuleNo	ModuleColor	Symbol
ENSMUSG00000026312	1	lightcyan	Cdh7
ENSMUSG00000057363	1	lightcyan	Uxs1
ENSMUSG00000032908	1	lightcyan	Sgpp2
ENSMUSG00000018417	1	lightcyan	Myo1b
ENSMUSG00000026384	1	lightcyan	Ptpn4
ENSMUSG00000026610	1	lightcyan	Esrrg
ENSMUSG00000037568	1	lightcyan	Vash2
ENSMUSG00000026452	1	lightcyan	Syt2
ENSMUSG00000026077	1	lightcyan	Npas2
ENSMUSG00000026065	1	lightcyan	Slc9a4
ENSMUSG00000041782	1	lightcyan	Lad1
ENSMUSG00000027298	1	lightcyan	Tyro3
ENSMUSG00000070880	1	lightcyan	Gad1
ENSMUSG00000026767	1	lightcyan	Mindy3
ENSMUSG00000026787	1	lightcyan	Gad2
ENSMUSG00000027004	1	lightcyan	Frzb
ENSMUSG00000038718	1	lightcyan	Pbx3
ENSMUSG00000027210	1	lightcyan	Meis2
ENSMUSG00000060988	1	lightcyan	Galnt13
ENSMUSG00000058740	1	lightcyan	Kcnt1
ENSMUSG00000031093	1	lightcyan	Dock11
ENSMUSG00000031245	1	lightcyan	Hmgn5
ENSMUSG00000000266	1	lightcyan	Mid2
ENSMUSG00000047045	1	lightcyan	Tmem164
ENSMUSG00000049191	1	lightcyan	Rtl5
ENSMUSG00000033910	1	lightcyan	Gucy1a1
ENSMUSG00000039735	1	lightcyan	Fnbp1l
ENSMUSG00000027716	1	lightcyan	Trpc3
ENSMUSG00000027993	1	lightcyan	Trim2
ENSMUSG00000041842	1	lightcyan	Fhdc1
ENSMUSG00000049100	1	lightcyan	Pcdh10
ENSMUSG00000036834	1	lightcyan	Plch1
ENSMUSG00000034544	1	lightcyan	Rsrc1
ENSMUSG00000100252	1	lightcyan	Mir124-2hg
ENSMUSG00000073779	1	lightcyan	Lrp8os2
ENSMUSG00000028906	1	lightcyan	Epb41
ENSMUSG00000028399	1	lightcyan	Ptprd
ENSMUSG00000028803	1	lightcyan	Nipal3
ENSMUSG00000028661	1	lightcyan	Epha8
ENSMUSG00000028565	1	lightcyan	Nfia
ENSMUSG00000028527	1	lightcyan	Ak4
ENSMUSG00000028584	1	lightcyan	Lrrc38
ENSMUSG00000070803	1	lightcyan	Cited4
ENSMUSG00000036052	1	lightcyan	Dnajb5
ENSMUSG00000041058	1	lightcyan	Wwp1
ENSMUSG00000037653	1	lightcyan	Kctd8
ENSMUSG00000029153	1	lightcyan	Ociad2
ENSMUSG00000056004	1	lightcyan	Elapor2
ENSMUSG00000044221	1	lightcyan	Grsf1
ENSMUSG00000039252	1	lightcyan	Lgi2
ENSMUSG00000029599	1	lightcyan	Ddx54
ENSMUSG00000089809	1	lightcyan	Rasgef1b
ENSMUSG00000029387	1	lightcyan	Gtf2h3
ENSMUSG00000030246	1	lightcyan	Ldhb
ENSMUSG00000030082	1	lightcyan	Sec61a1
ENSMUSG00000041301	1	lightcyan	Cftr
ENSMUSG00000044155	1	lightcyan	Lsm8
ENSMUSG00000033769	1	lightcyan	Exoc6b
ENSMUSG00000000439	1	lightcyan	Mkrn2
ENSMUSG00000046182	1	lightcyan	Gsg1l
ENSMUSG00000043964	1	lightcyan	Orai3
ENSMUSG00000035314	1	lightcyan	Gdpd5
ENSMUSG00000030688	1	lightcyan	Stard10
ENSMUSG00000042846	1	lightcyan	Lrrtm3
ENSMUSG00000019820	1	lightcyan	Utrn
ENSMUSG00000032788	1	lightcyan	Pdxk
ENSMUSG00000035835	1	lightcyan	Plppr3
ENSMUSG00000035963	1	lightcyan	Odf3l2
ENSMUSG00000019966	1	lightcyan	Kitl
ENSMUSG00000043670	1	lightcyan	Diras1
ENSMUSG00000031667	1	lightcyan	Aktip
ENSMUSG00000055421	1	lightcyan	Pcdh9
ENSMUSG00000032038	1	lightcyan	St3gal4
ENSMUSG00000032261	1	lightcyan	Sh3bgrl2
ENSMUSG00000010066	1	lightcyan	Cacna2d2
ENSMUSG00000039488	1	lightcyan	Cntn5
ENSMUSG00000013076	1	lightcyan	Amotl1
ENSMUSG00000032338	1	lightcyan	Hcn4
ENSMUSG00000032503	1	lightcyan	Arpp21
ENSMUSG00000032238	1	lightcyan	Rora
ENSMUSG00000062151	1	lightcyan	Unc13c
ENSMUSG00000035498	1	lightcyan	Cdcp1
ENSMUSG00000032612	1	lightcyan	Usp4
ENSMUSG00000043857	1	lightcyan	Mgat5b
ENSMUSG00000042529	1	lightcyan	Kcnj12
ENSMUSG00000001313	1	lightcyan	Rnd2
ENSMUSG00000020701	1	lightcyan	Tmem132e
ENSMUSG00000020396	1	lightcyan	Nefh
ENSMUSG00000003948	1	lightcyan	Mmd
ENSMUSG00000041046	1	lightcyan	Ramp3
ENSMUSG00000020152	1	lightcyan	Actr2
ENSMUSG00000056579	1	lightcyan	Tug1
ENSMUSG00000041112	1	lightcyan	Elmo1
ENSMUSG00000034488	1	lightcyan	Edil3
ENSMUSG00000078958	1	lightcyan	Atp6ap1l
ENSMUSG00000002997	1	lightcyan	Prkar2b
ENSMUSG00000020953	1	lightcyan	Coch
ENSMUSG00000021259	1	lightcyan	Cyp46a1
ENSMUSG00000021133	1	lightcyan	Susd6
ENSMUSG00000079055	1	lightcyan	Slc8a3
ENSMUSG00000068099	1	lightcyan	Smim45
ENSMUSG00000052560	1	lightcyan	Cpne8
ENSMUSG00000005716	1	lightcyan	Pvalb
ENSMUSG00000023017	1	lightcyan	Asic1
ENSMUSG00000022636	1	lightcyan	Alcam
ENSMUSG00000057880	1	lightcyan	Abat
ENSMUSG00000043140	1	lightcyan	Tmem186
ENSMUSG00000022494	1	lightcyan	Shisa9
ENSMUSG00000052316	1	lightcyan	Lrrc15
ENSMUSG00000071636	1	lightcyan	Rimbp3
ENSMUSG00000024044	1	lightcyan	Epb41l3
ENSMUSG00000003665	1	lightcyan	Has1
ENSMUSG00000063239	1	lightcyan	Grm4
ENSMUSG00000036533	1	lightcyan	Cdc42ep3
ENSMUSG00000024601	1	lightcyan	Isoc1
ENSMUSG00000006740	1	lightcyan	Kif5b
ENSMUSG00000057440	1	lightcyan	Mpp7
ENSMUSG00000024937	1	lightcyan	Ehbp1l1
ENSMUSG00000018821	1	lightcyan	Avpi1
ENSMUSG00000092083	2	royalblue	Kcnb2
ENSMUSG00000026620	2	royalblue	Mark1
ENSMUSG00000026442	2	royalblue	Nfasc
ENSMUSG00000038530	2	royalblue	Rgs4
ENSMUSG00000006576	2	royalblue	Slc4a3
ENSMUSG00000041642	2	royalblue	Kif21b
ENSMUSG00000042182	2	royalblue	Bend6
ENSMUSG00000074899	2	royalblue	Sptbn5
ENSMUSG00000027489	2	royalblue	Necab3
ENSMUSG00000050587	2	royalblue	Lrrc4c
ENSMUSG00000081229	2	royalblue	Lamr1-ps1
ENSMUSG00000079037	2	royalblue	Prnp
ENSMUSG00000036890	2	royalblue	Gtdc1
ENSMUSG00000017412	2	royalblue	Cacnb4
ENSMUSG00000026797	2	royalblue	Stxbp1
ENSMUSG00000027187	2	royalblue	Cat
ENSMUSG00000049775	2	royalblue	Tmsb4x
ENSMUSG00000028020	2	royalblue	Glrb
ENSMUSG00000070471	2	royalblue	Erich6
ENSMUSG00000039519	2	royalblue	Cyp7b1
ENSMUSG00000036885	2	royalblue	Arhgef26
ENSMUSG00000049288	2	royalblue	Lix1l
ENSMUSG00000045083	2	royalblue	Lingo2
ENSMUSG00000028333	2	royalblue	Anp32b
ENSMUSG00000036062	2	royalblue	Phf24
ENSMUSG00000003974	2	royalblue	Grm3
ENSMUSG00000029651	2	royalblue	Mtus2
ENSMUSG00000037605	2	royalblue	Adgrl3
ENSMUSG00000062604	2	royalblue	Srpk2
ENSMUSG00000029084	2	royalblue	Cd38
ENSMUSG00000033805	2	royalblue	Ephx4
ENSMUSG00000111375	2	royalblue	Btbd8
ENSMUSG00000038970	2	royalblue	Lmtk2
ENSMUSG00000059182	2	royalblue	Skap2
ENSMUSG00000003500	2	royalblue	Impdh1
ENSMUSG00000036862	2	royalblue	Dchs1
ENSMUSG00000048921	2	royalblue	Zfp689
ENSMUSG00000030671	2	royalblue	Pde3b
ENSMUSG00000055407	2	royalblue	Map6
ENSMUSG00000040125	2	royalblue	Gpr26
ENSMUSG00000043843	2	royalblue	Tmem145
ENSMUSG00000066189	2	royalblue	Cacng3
ENSMUSG00000053898	2	royalblue	Ech1
ENSMUSG00000070564	2	royalblue	Ntn5
ENSMUSG00000003271	2	royalblue	Sult2b1
ENSMUSG00000032737	2	royalblue	Inppl1
ENSMUSG00000063760	2	royalblue	Rnf217
ENSMUSG00000037855	2	royalblue	Zfp365
ENSMUSG00000074657	2	royalblue	Kif5a
ENSMUSG00000025404	2	royalblue	R3hdm2
ENSMUSG00000020150	2	royalblue	Gamt
ENSMUSG00000036306	2	royalblue	Lzts1
ENSMUSG00000039431	2	royalblue	Mtmr7
ENSMUSG00000031565	2	royalblue	Fgfr1
ENSMUSG00000031827	2	royalblue	Cotl1
ENSMUSG00000072294	2	royalblue	Klf12
ENSMUSG00000021959	2	royalblue	Lats2
ENSMUSG00000021983	2	royalblue	Atp8a2
ENSMUSG00000022075	2	royalblue	Rhobtb2
ENSMUSG00000022103	2	royalblue	Gfra2
ENSMUSG00000021820	2	royalblue	Camk2g
ENSMUSG00000041444	2	royalblue	Arhgap32
ENSMUSG00000039716	2	royalblue	Dock3
ENSMUSG00000047766	2	royalblue	Lrrc49
ENSMUSG00000003402	2	royalblue	Prkcsh
ENSMUSG00000034593	2	royalblue	Myo5a
ENSMUSG00000047193	2	royalblue	Dync2h1
ENSMUSG00000020914	2	royalblue	Top2a
ENSMUSG00000017176	2	royalblue	Nt5c3b
ENSMUSG00000020366	2	royalblue	Mapk9
ENSMUSG00000042189	2	royalblue	Tekt3
ENSMUSG00000037278	2	royalblue	Tmem97
ENSMUSG00000018634	2	royalblue	Crhr1
ENSMUSG00000020821	2	royalblue	Kif1c
ENSMUSG00000040543	2	royalblue	Pitpnm3
ENSMUSG00000038807	2	royalblue	Rap1gap2
ENSMUSG00000019437	2	royalblue	Tlcd1
ENSMUSG00000020859	2	royalblue	Spag9
ENSMUSG00000043439	2	royalblue	Epop
ENSMUSG00000042743	2	royalblue	Sgtb
ENSMUSG00000021484	2	royalblue	Lman2
ENSMUSG00000021301	2	royalblue	Hecw1
ENSMUSG00000062054	2	royalblue	Iah1
ENSMUSG00000021096	2	royalblue	Ppm1a
ENSMUSG00000036257	2	royalblue	Pnpla8
ENSMUSG00000022354	2	royalblue	Ndufb9
ENSMUSG00000040452	2	royalblue	Cdh12
ENSMUSG00000037386	2	royalblue	Rims2
ENSMUSG00000046613	2	royalblue	Vwa5b2
ENSMUSG00000063952	2	royalblue	Brpf3
ENSMUSG00000074746	2	royalblue	Pdzd8
ENSMUSG00000024725	2	royalblue	Ostf1
ENSMUSG00000024799	2	royalblue	Tm7sf2
ENSG00000186868	2	royalblue	MAPT
ENSMUSG00000026495	3	brown	Efcab2
ENSMUSG00000055067	3	brown	Smyd3
ENSMUSG00000054702	3	brown	Ap1s3
ENSMUSG00000042641	3	brown	Rgsl1
ENSMUSG00000079658	3	brown	Eloc
ENSMUSG00000036104	3	brown	Rab3gap1
ENSMUSG00000025934	3	brown	Gsta3
ENSMUSG00000026353	3	brown	Ubxn4
ENSMUSG00000026156	3	brown	B3gat2
ENSMUSG00000026725	3	brown	Tnn
ENSMUSG00000001305	3	brown	Rrp15
ENSMUSG00000026427	3	brown	Eif2d
ENSMUSG00000026430	3	brown	Rassf5
ENSMUSG00000026021	3	brown	Sumo1
ENSMUSG00000049866	3	brown	Arl4c
ENSMUSG00000026301	3	brown	Iqca
ENSMUSG00000041757	3	brown	Plekha6
ENSMUSG00000016179	3	brown	Camk1g
ENSMUSG00000040918	3	brown	Slc19a2
ENSMUSG00000025969	3	brown	Nrp2
ENSMUSG00000026574	3	brown	Dpt
ENSMUSG00000010453	3	brown	Kansl3
ENSMUSG00000027520	3	brown	Zdbf2
ENSMUSG00000034220	3	brown	Gpc1
ENSMUSG00000042229	3	brown	Rabif
ENSMUSG00000026117	3	brown	Zap70
ENSMUSG00000026278	3	brown	Bok
ENSMUSG00000050296	3	brown	Abca12
ENSMUSG00000047496	3	brown	Rnf152
ENSMUSG00000026188	3	brown	Tmem169
ENSMUSG00000018189	3	brown	Uchl5
ENSMUSG00000026360	3	brown	Rgs2
ENSMUSG00000026526	3	brown	Fh1
ENSMUSG00000052759	3	brown	Gpr25
ENSMUSG00000042115	3	brown	Klhdc8a
ENSMUSG00000042451	3	brown	Mybph
ENSMUSG00000025925	3	brown	Terf1
ENSMUSG00000033364	3	brown	Usp37
ENSMUSG00000026414	3	brown	Tnnt2
ENSMUSG00000027297	3	brown	Ltk
ENSMUSG00000026676	3	brown	Ccdc3
ENSMUSG00000027577	3	brown	Chrna4
ENSMUSG00000002100	3	brown	Mybpc3
ENSMUSG00000014959	3	brown	Gorasp2
ENSMUSG00000041911	3	brown	Dlx1
ENSMUSG00000053702	3	brown	Nebl
ENSMUSG00000002103	3	brown	Acp2
ENSMUSG00000026740	3	brown	Dnajc1
ENSMUSG00000027255	3	brown	Arfgap2
ENSMUSG00000038605	3	brown	Samd10
ENSMUSG00000027584	3	brown	Oprl1
ENSMUSG00000055485	3	brown	Soga1
ENSMUSG00000026848	3	brown	Tor1b
ENSMUSG00000048486	3	brown	Fitm2
ENSMUSG00000018322	3	brown	Tomm34
ENSMUSG00000001403	3	brown	Ube2c
ENSMUSG00000027001	3	brown	Dusp19
ENSMUSG00000074570	3	brown	Cass4
ENSMUSG00000027357	3	brown	Crls1
ENSMUSG00000074771	3	brown	Ankef1
ENSMUSG00000039033	3	brown	Tasp1
ENSMUSG00000026923	3	brown	Notch1
ENSMUSG00000027425	3	brown	Kat14
ENSMUSG00000037259	3	brown	Dzank1
ENSMUSG00000027344	3	brown	Fsip1
ENSMUSG00000026749	3	brown	Nek6
ENSMUSG00000032046	3	brown	Abhd12
ENSMUSG00000068264	3	brown	Ap5s1
ENSMUSG00000045838	3	brown	Ccdc9b
ENSMUSG00000051319	3	brown	Mtln
ENSMUSG00000027618	3	brown	Nfs1
ENSMUSG00000027180	3	brown	Fbxo3
ENSMUSG00000047907	3	brown	Tshz2
ENSMUSG00000037197	3	brown	Rbm17
ENSMUSG00000054074	3	brown	Skida1
ENSMUSG00000037708	3	brown	Spag6
ENSMUSG00000040495	3	brown	Chrm4
ENSMUSG00000027351	3	brown	Spred1
ENSMUSG00000054484	3	brown	Tmem62
ENSMUSG00000034755	3	brown	Pcdh11x
ENSMUSG00000057457	3	brown	Phex
ENSMUSG00000033460	3	brown	Armcx1
ENSMUSG00000062184	3	brown	Hs6st2
ENSMUSG00000019087	3	brown	Atp6ap1
ENSMUSG00000031398	3	brown	Plxna3
ENSMUSG00000082319	3	brown	Actr3-ps
ENSMUSG00000073139	3	brown	Tmem185a
ENSMUSG00000071679	3	brown	Rtl4
ENSMUSG00000041700	3	brown	Lhfpl1
ENSMUSG00000082284	3	brown	H3f3a-ps1
ENSMUSG00000082229	3	brown	Nap1l2
ENSMUSG00000044149	3	brown	Nkrf
ENSMUSG00000037315	3	brown	Jade3
ENSMUSG00000087403	3	brown	Kantr
ENSMUSG00000031302	3	brown	Nlgn3
ENSMUSG00000085584	3	brown	Rtl9
ENSMUSG00000027673	3	brown	Ndufb5
ENSMUSG00000043461	3	brown	Sptssb
ENSMUSG00000034151	3	brown	Zbbx
ENSMUSG00000027978	3	brown	Prss12
ENSMUSG00000040016	3	brown	Ptger3
ENSMUSG00000025764	3	brown	Jade1
ENSMUSG00000061143	3	brown	Maml3
ENSMUSG00000028013	3	brown	Ppa2
ENSMUSG00000074489	3	brown	Bglap3
ENSMUSG00000027868	3	brown	Tbx15
ENSMUSG00000027867	3	brown	Spag17
ENSMUSG00000045328	3	brown	Cenpe
ENSMUSG00000056947	3	brown	Mab21l1
ENSMUSG00000028057	3	brown	Rit1
ENSMUSG00000027953	3	brown	Slc50a1
ENSMUSG00000027952	3	brown	Pmvk
ENSMUSG00000028184	3	brown	Adgrl2
ENSMUSG00000068732	3	brown	Tmem167b
ENSMUSG00000033721	3	brown	Vav3
ENSMUSG00000059857	3	brown	Ntng1
ENSMUSG00000027834	3	brown	Serpini1
ENSMUSG00000037737	3	brown	Actrt3
ENSMUSG00000028010	3	brown	Gar1
ENSMUSG00000027905	3	brown	Ddx20
ENSMUSG00000060671	3	brown	Atp8b2
ENSMUSG00000027932	3	brown	Slc27a3
ENSMUSG00000028618	3	brown	Tmem59
ENSMUSG00000057375	3	brown	Yipf1
ENSMUSG00000034762	3	brown	Glis1
ENSMUSG00000041272	3	brown	Tox
ENSMUSG00000028977	3	brown	Casz1
ENSMUSG00000028373	3	brown	Astn2
ENSMUSG00000050511	3	brown	Oprd1
ENSMUSG00000028948	3	brown	Nol9
ENSMUSG00000028555	3	brown	Ttc39a
ENSMUSG00000028551	3	brown	Cdkn2c
ENSMUSG00000028882	3	brown	Ppp1r8
ENSMUSG00000061298	3	brown	Agbl4
ENSMUSG00000058498	3	brown	Rnf207
ENSMUSG00000056596	3	brown	Trnp1
ENSMUSG00000028843	3	brown	Sh3bgrl3
ENSMUSG00000028701	3	brown	Lurap1
ENSMUSG00000028826	3	brown	Maco1
ENSMUSG00000029055	3	brown	Plch2
ENSMUSG00000066113	3	brown	Adamtsl1
ENSMUSG00000028670	3	brown	Lypla2
ENSMUSG00000028687	3	brown	Mutyh
ENSMUSG00000043155	3	brown	Hpdl
ENSMUSG00000028576	3	brown	Ift74
ENSMUSG00000028573	3	brown	Fggy
ENSMUSG00000041025	3	brown	Iffo2
ENSMUSG00000028656	3	brown	Cap1
ENSMUSG00000006218	3	brown	Fam131c
ENSMUSG00000028647	3	brown	Mycbp
ENSMUSG00000043962	3	brown	Thrap3
ENSMUSG00000003032	3	brown	Klf4
ENSMUSG00000040387	3	brown	Klhl32
ENSMUSG00000066324	3	brown	Bpnt2
ENSMUSG00000028249	3	brown	Sdcbp
ENSMUSG00000046593	3	brown	Tmem215
ENSMUSG00000028212	3	brown	Ccne2
ENSMUSG00000006586	3	brown	Runx1t1
ENSMUSG00000042788	3	brown	Fam166b
ENSMUSG00000051517	3	brown	Arhgef39
ENSMUSG00000028464	3	brown	Tpm2
ENSMUSG00000028469	3	brown	Npr2
ENSMUSG00000035539	3	brown	Ccdc180
ENSMUSG00000028337	3	brown	Coro2a
ENSMUSG00000066149	3	brown	Cdc26
ENSMUSG00000057530	3	brown	Ece1
ENSMUSG00000070923	3	brown	Klhl9
ENSMUSG00000028792	3	brown	Ak2
ENSMUSG00000029330	3	brown	Cds1
ENSMUSG00000038569	3	brown	Rad9b
ENSMUSG00000049907	3	brown	Rasl11b
ENSMUSG00000029276	3	brown	Glmn
ENSMUSG00000040584	3	brown	Abcb1a
ENSMUSG00000034324	3	brown	Tmem132c
ENSMUSG00000063430	3	brown	Wscd2
ENSMUSG00000048520	3	brown	Fbxl13
ENSMUSG00000029428	3	brown	Stx2
ENSMUSG00000025340	3	brown	Rabgef1
ENSMUSG00000048578	3	brown	Mlec
ENSMUSG00000015944	3	brown	Castor2
ENSMUSG00000041740	3	brown	Rnf10
ENSMUSG00000015882	3	brown	Lcorl
ENSMUSG00000107369	3	brown	Gstm2-ps1
ENSMUSG00000010721	3	brown	Lmbr1
ENSMUSG00000090326	3	brown	Dthd1
ENSMUSG00000029171	3	brown	Pgm2
ENSMUSG00000029603	3	brown	Dtx1
ENSMUSG00000047215	3	brown	Rpl9
ENSMUSG00000038593	3	brown	Tctn1
ENSMUSG00000029135	3	brown	Fosl2
ENSMUSG00000036639	3	brown	Nudt1
ENSMUSG00000029580	3	brown	Actb
ENSMUSG00000029314	3	brown	Gpat3
ENSMUSG00000029414	3	brown	Kntc1
ENSMUSG00000001847	3	brown	Rac1
ENSMUSG00000029657	3	brown	Hsph1
ENSMUSG00000051950	3	brown	B3glct
ENSMUSG00000034118	3	brown	Tpst1
ENSMUSG00000029352	3	brown	Crybb3
ENSMUSG00000042216	3	brown	Sgsm1
ENSMUSG00000097392	3	brown	Thoc2l
ENSMUSG00000029516	3	brown	Cit
ENSMUSG00000049265	3	brown	Kcnk3
ENSMUSG00000052337	3	brown	Immt
ENSMUSG00000030263	3	brown	Irag2
ENSMUSG00000064080	3	brown	Fbln2
ENSMUSG00000079523	3	brown	Tmsb10
ENSMUSG00000034037	3	brown	Fgd5
ENSMUSG00000001520	3	brown	Nrip2
ENSMUSG00000029778	3	brown	Adcyap1r1
ENSMUSG00000030092	3	brown	Cntn6
ENSMUSG00000064293	3	brown	Cntn4
ENSMUSG00000055430	3	brown	Nap1l5
ENSMUSG00000024211	3	brown	Grm8
ENSMUSG00000051343	3	brown	Rab11fip5
ENSMUSG00000030209	3	brown	Grin2b
ENSMUSG00000030213	3	brown	Atf7ip
ENSMUSG00000063810	3	brown	Alms1
ENSMUSG00000079654	3	brown	Prrt4
ENSMUSG00000029910	3	brown	Mad2l1
ENSMUSG00000048489	3	brown	Depp1
ENSMUSG00000007827	3	brown	Ankrd26
ENSMUSG00000045613	3	brown	Chrm2
ENSMUSG00000004446	3	brown	Bid
ENSMUSG00000029769	3	brown	Ccdc136
ENSMUSG00000042770	3	brown	Hebp1
ENSMUSG00000030060	3	brown	Hmces
ENSMUSG00000057497	3	brown	Fam136a
ENSMUSG00000057706	3	brown	Mex3b
ENSMUSG00000019158	3	brown	Tmem160
ENSMUSG00000030553	3	brown	Pgpep1l
ENSMUSG00000020420	3	brown	Zfp607a
ENSMUSG00000030413	3	brown	Pglyrp1
ENSMUSG00000066406	3	brown	Akap13
ENSMUSG00000030598	3	brown	Fbxo17
ENSMUSG00000030612	3	brown	Mrpl46
ENSMUSG00000003545	3	brown	Fosb
ENSMUSG00000039099	3	brown	Wdr93
ENSMUSG00000035429	3	brown	Ptprh
ENSMUSG00000055723	3	brown	Rras2
ENSMUSG00000030431	3	brown	Tmem238
ENSMUSG00000045659	3	brown	Plekha7
ENSMUSG00000005447	3	brown	Pafah1b3
ENSMUSG00000030922	3	brown	Lyrm1
ENSMUSG00000030500	3	brown	Slc17a6
ENSMUSG00000000216	3	brown	Scnn1g
ENSMUSG00000030870	3	brown	Ubfd1
ENSMUSG00000030447	3	brown	Cyfip1
ENSMUSG00000025478	3	brown	Dpysl4
ENSMUSG00000096257	3	brown	Ccer2
ENSMUSG00000101970	3	brown	Chaserr
ENSMUSG00000121302	3	brown	ENSMUSG00000121302
ENSMUSG00000053198	3	brown	Prx
ENSMUSG00000030982	3	brown	Vps35l
ENSMUSG00000092416	3	brown	Zfp141
ENSMUSG00000045114	3	brown	Prrt2
ENSMUSG00000003865	3	brown	Gys1
ENSMUSG00000078768	3	brown	Zfp566
ENSMUSG00000059891	3	brown	Tsks
ENSMUSG00000086266	3	brown	Igf2os
ENSMUSG00000002265	3	brown	Peg3
ENSMUSG00000051527	3	brown	Usp29
ENSMUSG00000031493	3	brown	Ggn
ENSMUSG00000020067	3	brown	Mypn
ENSMUSG00000020056	3	brown	Washc3
ENSMUSG00000019777	3	brown	Hdac2
ENSMUSG00000051736	3	brown	Fam229b
ENSMUSG00000020123	3	brown	Avpr1a
ENSMUSG00000061904	3	brown	Slc25a3
ENSMUSG00000025409	3	brown	Mbd6
ENSMUSG00000025407	3	brown	Gli1
ENSMUSG00000020109	3	brown	Dnajb12
ENSMUSG00000020140	3	brown	Lgr5
ENSMUSG00000078453	3	brown	Abracl
ENSMUSG00000039835	3	brown	Nhsl1
ENSMUSG00000039089	3	brown	L3mbtl3
ENSMUSG00000046807	3	brown	Lrrc75b
ENSMUSG00000020231	3	brown	Dip2a
ENSMUSG00000020241	3	brown	Col6a2
ENSMUSG00000043822	3	brown	Adamtsl5
ENSMUSG00000020216	3	brown	Jsrp1
ENSMUSG00000025352	3	brown	Gdf11
ENSMUSG00000019843	3	brown	Fyn
ENSMUSG00000110841	3	brown	Gpx4-ps2
ENSMUSG00000057729	3	brown	Prtn3
ENSMUSG00000020327	3	brown	Fgf22
ENSMUSG00000037101	3	brown	Ttc29
ENSMUSG00000038482	3	brown	Tfdp1
ENSMUSG00000031948	3	brown	Kars
ENSMUSG00000005150	3	brown	Wdr83
ENSMUSG00000031543	3	brown	Ank1
ENSMUSG00000037492	3	brown	Zmat4
ENSMUSG00000055932	3	brown	Fto
ENSMUSG00000031987	3	brown	Egln1
ENSMUSG00000040028	3	brown	Elavl1
ENSMUSG00000045969	3	brown	Ing1
ENSMUSG00000005410	3	brown	Mcm5
ENSMUSG00000036534	3	brown	Slc38a7
ENSMUSG00000062991	3	brown	Nrg1
ENSMUSG00000050271	3	brown	Prag1
ENSMUSG00000039620	3	brown	Trmt9b
ENSMUSG00000014859	3	brown	E2f4
ENSMUSG00000003573	3	brown	Homer3
ENSMUSG00000034189	3	brown	Hsdl1
ENSMUSG00000031962	3	brown	Cdh15
ENSMUSG00000019478	3	brown	Rab4a
ENSMUSG00000031979	3	brown	Cog2
ENSMUSG00000044600	3	brown	Smim7
ENSMUSG00000074217	3	brown	Misp3
ENSMUSG00000052616	3	brown	Terb1
ENSMUSG00000021963	3	brown	Sap18
ENSMUSG00000021879	3	brown	Dnah12
ENSMUSG00000022112	3	brown	Gpc5
ENSMUSG00000022044	3	brown	Stmn4
ENSMUSG00000022092	3	brown	Ppp3cc
ENSMUSG00000021904	3	brown	Sema3g
ENSMUSG00000022160	3	brown	Mettl3
ENSMUSG00000021796	3	brown	Bmpr1a
ENSMUSG00000037798	3	brown	Mat1a
ENSMUSG00000040632	3	brown	Nrl
ENSMUSG00000023411	3	brown	Nfatc4
ENSMUSG00000021779	3	brown	Thrb
ENSMUSG00000021747	3	brown	Cfap20dc
ENSMUSG00000048582	3	brown	Gja3
ENSMUSG00000033453	3	brown	Adamts15
ENSMUSG00000032344	3	brown	Cgas
ENSMUSG00000046186	3	brown	Cd109
ENSMUSG00000032578	3	brown	Cish
ENSMUSG00000066456	3	brown	Hmgn3
ENSMUSG00000032303	3	brown	Chrna3
ENSMUSG00000057367	3	brown	Birc2
ENSMUSG00000032009	3	brown	Sesn3
ENSMUSG00000042106	3	brown	Inka1
ENSMUSG00000032109	3	brown	Nlrx1
ENSMUSG00000032463	3	brown	Faim
ENSMUSG00000035606	3	brown	Ky
ENSMUSG00000032477	3	brown	Cdc25a
ENSMUSG00000032548	3	brown	Slco2a1
ENSMUSG00000035919	3	brown	Bbs9
ENSMUSG00000031963	3	brown	Bmper
ENSMUSG00000043659	3	brown	Npsr1
ENSMUSG00000033543	3	brown	Gtf2a2
ENSMUSG00000035769	3	brown	Xylb
ENSMUSG00000032184	3	brown	Lysmd2
ENSMUSG00000025786	3	brown	Zdhhc3
ENSMUSG00000079084	3	brown	Ccdc82
ENSMUSG00000047220	3	brown	Iho1
ENSMUSG00000032024	3	brown	Clmp
ENSMUSG00000049154	3	brown	Fam183b
ENSMUSG00000045374	3	brown	Wdr81
ENSMUSG00000038178	3	brown	Slc43a2
ENSMUSG00000019312	3	brown	Grb7
ENSMUSG00000017288	3	brown	Vps53
ENSMUSG00000057948	3	brown	Unc13d
ENSMUSG00000046275	3	brown	Trarg1
ENSMUSG00000020836	3	brown	Coro6
ENSMUSG00000020271	3	brown	Fbxw11
ENSMUSG00000019102	3	brown	Aldh3a1
ENSMUSG00000042436	3	brown	Mfap4
ENSMUSG00000040350	3	brown	Trim7
ENSMUSG00000037791	3	brown	Phf12
ENSMUSG00000048070	3	brown	Pirt
ENSMUSG00000055775	3	brown	Myh8
ENSMUSG00000020902	3	brown	Ntn1
ENSMUSG00000052921	3	brown	Arhgef15
ENSMUSG00000039321	3	brown	Uts2r
ENSMUSG00000045532	3	brown	C1ql1
ENSMUSG00000062421	3	brown	Arf2
ENSMUSG00000020686	3	brown	Gas2l2
ENSMUSG00000018340	3	brown	Anxa6
ENSMUSG00000020451	3	brown	Limk2
ENSMUSG00000019368	3	brown	Sec14l4
ENSMUSG00000003949	3	brown	Hlf
ENSMUSG00000041654	3	brown	Slc39a11
ENSMUSG00000070390	3	brown	Nlrp1b
ENSMUSG00000049800	3	brown	Sertad2
ENSMUSG00000020321	3	brown	Mdh1
ENSMUSG00000057058	3	brown	Skap1
ENSMUSG00000018659	3	brown	Pnpo
ENSMUSG00000018678	3	brown	Sp2
ENSMUSG00000034543	3	brown	Morc2a
ENSMUSG00000034282	3	brown	Evpl
ENSMUSG00000060216	3	brown	Arrb2
ENSMUSG00000019590	3	brown	Cyb561
ENSMUSG00000039307	3	brown	Hexdc
ENSMUSG00000044068	3	brown	Zrsr1
ENSMUSG00000020923	3	brown	Ubtf
ENSMUSG00000050288	3	brown	Fzd2
ENSMUSG00000018537	3	brown	Pcgf2
ENSMUSG00000018899	3	brown	Irf1
ENSMUSG00000039096	3	brown	Rsad1
ENSMUSG00000020893	3	brown	Per1
ENSMUSG00000018470	3	brown	Kcnab3
ENSMUSG00000043419	3	brown	Rnf227
ENSMUSG00000049538	3	brown	Adamts16
ENSMUSG00000038068	3	brown	Rnf144b
ENSMUSG00000041417	3	brown	Pik3r1
ENSMUSG00000033781	3	brown	Asb13
ENSMUSG00000021759	3	brown	Plpp1
ENSMUSG00000046159	3	brown	Chrm3
ENSMUSG00000021728	3	brown	Emb
ENSMUSG00000042102	3	brown	Dmgdh
ENSMUSG00000045312	3	brown	Lhfpl2
ENSMUSG00000047246	3	brown	H2bc6
ENSMUSG00000021365	3	brown	Nedd9
ENSMUSG00000021556	3	brown	Golm1
ENSMUSG00000020571	3	brown	Pdia6
ENSMUSG00000021255	3	brown	Esrrb
ENSMUSG00000091905	3	brown	Dnajb6-ps
ENSMUSG00000076617	3	brown	Ighm
ENSMUSG00000044573	3	brown	Acp1
ENSMUSG00000020988	3	brown	L2hgdh
ENSMUSG00000021007	3	brown	Spata7
ENSMUSG00000021177	3	brown	Tdp1
ENSMUSG00000090946	3	brown	Ccdc71l
ENSMUSG00000035799	3	brown	Twist1
ENSMUSG00000021094	3	brown	Dhrs7
ENSMUSG00000021054	3	brown	Sgpp1
ENSMUSG00000021047	3	brown	Nova1
ENSMUSG00000084883	3	brown	Ccdc85c
ENSMUSG00000048833	3	brown	Slc39a9
ENSMUSG00000042734	3	brown	Ttc9
ENSMUSG00000020634	3	brown	Ubxn2a
ENSMUSG00000001225	3	brown	Slc26a3
ENSMUSG00000097451	3	brown	Rian
ENSMUSG00000079036	3	brown	Alkbh1
ENSMUSG00000021039	3	brown	Snw1
ENSMUSG00000021278	3	brown	Amn
ENSMUSG00000041849	3	brown	Card6
ENSMUSG00000022365	3	brown	Derl1
ENSMUSG00000016757	3	brown	Ttll12
ENSMUSG00000022439	3	brown	Parvg
ENSMUSG00000035891	3	brown	Cerk
ENSMUSG00000039385	3	brown	Cdh6
ENSMUSG00000036760	3	brown	Kcnk9
ENSMUSG00000091680	3	brown	Klhdc7b
ENSMUSG00000036661	3	brown	Dennd3
ENSMUSG00000022234	3	brown	Cct5
ENSMUSG00000022635	3	brown	Zcrb1
ENSMUSG00000022312	3	brown	Eif3h
ENSMUSG00000022419	3	brown	Deptor
ENSMUSG00000022558	3	brown	Mroh1
ENSMUSG00000022433	3	brown	Csnk1e
ENSMUSG00000042351	3	brown	Grap2
ENSMUSG00000022400	3	brown	Rbx1
ENSMUSG00000036273	3	brown	Lrrk2
ENSMUSG00000106847	3	brown	Peg13
ENSMUSG00000022587	3	brown	Ly6e
ENSMUSG00000029875	3	brown	Ccdc184
ENSMUSG00000022421	3	brown	Nptxr
ENSMUSG00000003354	3	brown	Ccdc65
ENSMUSG00000067713	3	brown	Prkag1
ENSMUSG00000023021	3	brown	Cers5
ENSMUSG00000001289	3	brown	Pfdn5
ENSMUSG00000022759	3	brown	Lrrc74b
ENSMUSG00000022641	3	brown	Bbx
ENSMUSG00000064310	3	brown	Zpld1
ENSMUSG00000040732	3	brown	Erg
ENSMUSG00000022895	3	brown	Ets2
ENSMUSG00000052504	3	brown	Epha3
ENSMUSG00000022865	3	brown	Cxadr
ENSMUSG00000006998	3	brown	Psmd2
ENSMUSG00000005718	3	brown	Tfap4
ENSMUSG00000039179	3	brown	Tekt5
ENSMUSG00000033383	3	brown	Rtp1
ENSMUSG00000051065	3	brown	Mb21d2
ENSMUSG00000022680	3	brown	Pdxdc1
ENSMUSG00000047434	3	brown	Xxylt1
ENSMUSG00000046598	3	brown	Bdh1
ENSMUSG00000035629	3	brown	Rubcn
ENSMUSG00000022808	3	brown	Snx4
ENSMUSG00000022768	3	brown	Ccdc116
ENSMUSG00000022763	3	brown	Aifm3
ENSMUSG00000024146	3	brown	Cript
ENSMUSG00000040680	3	brown	Kremen2
ENSMUSG00000023923	3	brown	Tbc1d5
ENSMUSG00000039154	3	brown	Shd
ENSMUSG00000117406	3	brown	Ntn3
ENSMUSG00000044279	3	brown	Crb3
ENSMUSG00000052031	3	brown	Tagap1
ENSMUSG00000094724	3	brown	Rnaset2b
ENSMUSG00000006818	3	brown	Sod2
ENSMUSG00000039601	3	brown	Rcan2
ENSMUSG00000023959	3	brown	Clic5
ENSMUSG00000059811	3	brown	Atl2
ENSMUSG00000033966	3	brown	Cdkl4
ENSMUSG00000024246	3	brown	Thumpd2
ENSMUSG00000062859	3	brown	Tcp11
ENSMUSG00000055817	3	brown	Mta3
ENSMUSG00000004864	3	brown	Mapk13
ENSMUSG00000024042	3	brown	Sik1
ENSMUSG00000036492	3	brown	Rnf39
ENSMUSG00000067370	3	brown	B3galt4
ENSMUSG00000073405	3	brown	H2-T-ps
ENSMUSG00000057455	3	brown	Rit2
ENSMUSG00000042834	3	brown	Nrep
ENSMUSG00000024583	3	brown	Txnl1
ENSMUSG00000051599	3	brown	Pcdhb2
ENSMUSG00000045062	3	brown	Pcdhb7
ENSMUSG00000046318	3	brown	Ccbe1
ENSMUSG00000024525	3	brown	Impa2
ENSMUSG00000024442	3	brown	Dele1
ENSMUSG00000024493	3	brown	Lars
ENSMUSG00000061684	3	brown	Rpl21-ps8
ENSMUSG00000058881	3	brown	Zfp516
ENSMUSG00000047992	3	brown	Dipk1c
ENSMUSG00000024647	3	brown	Cbln2
ENSMUSG00000024421	3	brown	Lama3
ENSMUSG00000024424	3	brown	Ttc39c
ENSMUSG00000069372	3	brown	Ctxn3
ENSMUSG00000037058	3	brown	Paip2
ENSMUSG00000024558	3	brown	Mapk4
ENSMUSG00000024270	3	brown	Slc39a6
ENSMUSG00000048138	3	brown	Dmrt2
ENSMUSG00000024926	3	brown	Kat5
ENSMUSG00000039097	3	brown	Rln1
ENSMUSG00000074909	3	brown	Ranbp6
ENSMUSG00000024997	3	brown	Prdx3
ENSMUSG00000024805	3	brown	Pcgf5
ENSMUSG00000044026	3	brown	Slc35g1
ENSMUSG00000047787	3	brown	Flrt1
ENSMUSG00000035049	3	brown	Rrp12
ENSMUSG00000025171	3	brown	Ubtd1
ENSMUSG00000024660	3	brown	Incenp
ENSMUSG00000041491	3	brown	Cep78
ENSMUSG00000025227	3	brown	Mfsd13a
ENSMUSG00000037847	3	brown	Nmrk1
ENSMUSG00000025027	3	brown	Xpnpep1
ENSMUSG00000024835	3	brown	Coro1b
ENSMUSG00000024942	3	brown	Capn1
ENSMUSG00000007338	3	brown	Mrpl49
ENSMUSG00000097636	3	brown	Mirt1
ENSMUSG00000064354	3	brown	mt-Co2
ENSMUSG00000026479	4	red	Lamc2
ENSMUSG00000042708	4	red	Shcbp1l
ENSMUSG00000025986	4	red	Slc39a10
ENSMUSG00000066800	4	red	Rnasel
ENSMUSG00000042501	4	red	Cpa6
ENSMUSG00000054976	4	red	Nyap2
ENSMUSG00000066797	4	red	Zfp648
ENSMUSG00000056708	4	red	Ier5
ENSMUSG00000060743	4	red	H3f3a
ENSMUSG00000036815	4	red	Dpp10
ENSMUSG00000042807	4	red	Hecw2
ENSMUSG00000073678	4	red	Pgap1
ENSMUSG00000038331	4	red	Satb2
ENSMUSG00000026432	4	red	Avpr1b
ENSMUSG00000026024	4	red	Als2
ENSMUSG00000026626	4	red	Ppp2r5a
ENSMUSG00000048126	4	red	Col6a3
ENSMUSG00000044055	4	red	Otos
ENSMUSG00000047067	4	red	Dusp28
ENSMUSG00000026116	4	red	Tmem131
ENSMUSG00000025946	4	red	Pth2r
ENSMUSG00000026688	4	red	Mgst3
ENSMUSG00000073609	4	red	D2hgdh
ENSMUSG00000045648	4	red	Vwc2l
ENSMUSG00000026335	4	red	Pam
ENSMUSG00000050840	4	red	Cdh20
ENSMUSG00000038026	4	red	Kcnj9
ENSMUSG00000035131	4	red	Brinp3
ENSMUSG00000050069	4	red	Grem2
ENSMUSG00000026080	4	red	Chst10
ENSMUSG00000026167	4	red	Wnt10a
ENSMUSG00000051985	4	red	Igfn1
ENSMUSG00000026411	4	red	Tmem9
ENSMUSG00000026888	4	red	Grb14
ENSMUSG00000026837	4	red	Col5a1
ENSMUSG00000035829	4	red	Ppp1r26
ENSMUSG00000027568	4	red	Ntsr1
ENSMUSG00000027490	4	red	E2f1
ENSMUSG00000033486	4	red	Catsper2
ENSMUSG00000026707	4	red	Nsun6
ENSMUSG00000036617	4	red	Etl4
ENSMUSG00000002733	4	red	Plekha3
ENSMUSG00000026779	4	red	Mastl
ENSMUSG00000035226	4	red	Rims4
ENSMUSG00000027188	4	red	Pamr1
ENSMUSG00000027087	4	red	Itgav
ENSMUSG00000017664	4	red	Slc35c2
ENSMUSG00000039195	4	red	Bbln
ENSMUSG00000027318	4	red	Adam33
ENSMUSG00000038860	4	red	Garnl3
ENSMUSG00000027560	4	red	Dok5
ENSMUSG00000067578	4	red	Cbln4
ENSMUSG00000027356	4	red	Fermt1
ENSMUSG00000027509	4	red	Rae1
ENSMUSG00000037279	4	red	Ovol2
ENSMUSG00000026915	4	red	Strbp
ENSMUSG00000026826	4	red	Nr4a2
ENSMUSG00000026991	4	red	Pkp4
ENSMUSG00000035033	4	red	Tbr1
ENSMUSG00000035000	4	red	Dpp4
ENSMUSG00000005802	4	red	Slc30a4
ENSMUSG00000048911	4	red	Rnf24
ENSMUSG00000014355	4	red	Anapc1
ENSMUSG00000027610	4	red	Gss
ENSMUSG00000051154	4	red	Commd3
ENSMUSG00000064329	4	red	Scn1a
ENSMUSG00000033361	4	red	Prrg3
ENSMUSG00000031230	4	red	Fgf16
ENSMUSG00000031365	4	red	Zfp275
ENSMUSG00000054293	4	red	P2ry10b
ENSMUSG00000025529	4	red	Zfp711
ENSMUSG00000031262	4	red	Cenpi
ENSMUSG00000009596	4	red	Taf7l
ENSMUSG00000059203	4	red	Il1rapl2
ENSMUSG00000079534	4	red	Pwwp4c
ENSMUSG00000025246	4	red	Tbl1x
ENSMUSG00000034311	4	red	Kif4
ENSMUSG00000071745	4	red	Pwwp4b
ENSMUSG00000056900	4	red	Usp13
ENSMUSG00000043300	4	red	B3galnt1
ENSMUSG00000034009	4	red	Rxfp1
ENSMUSG00000058400	4	red	Qrfpr
ENSMUSG00000085007	4	red	Smim43
ENSMUSG00000015711	4	red	Prune1
ENSMUSG00000027797	4	red	Dclk1
ENSMUSG00000028197	4	red	Col24a1
ENSMUSG00000005034	4	red	Prkacb
ENSMUSG00000045092	4	red	S1pr1
ENSMUSG00000027999	4	red	Pla2g12a
ENSMUSG00000040724	4	red	Kcna2
ENSMUSG00000046818	4	red	Ddit4l
ENSMUSG00000028773	4	red	Fabp3
ENSMUSG00000039137	4	red	Whrn
ENSMUSG00000028370	4	red	Pappa
ENSMUSG00000028546	4	red	Elavl4
ENSMUSG00000028545	4	red	Bend5
ENSMUSG00000029026	4	red	Trp73
ENSMUSG00000038172	4	red	Ttc39b
ENSMUSG00000028832	4	red	Stmn1
ENSMUSG00000062157	4	red	Ifnlr1
ENSMUSG00000028690	4	red	Mmachc
ENSMUSG00000035407	4	red	Kank4
ENSMUSG00000028532	4	red	Cachd1
ENSMUSG00000028634	4	red	Hivep3
ENSMUSG00000032890	4	red	Rims3
ENSMUSG00000028920	4	red	Fbxo42
ENSMUSG00000042367	4	red	Gjb3
ENSMUSG00000055373	4	red	Fut9
ENSMUSG00000040536	4	red	Necab1
ENSMUSG00000028457	4	red	Atp8b5
ENSMUSG00000040659	4	red	Efhd2
ENSMUSG00000036073	4	red	Galt
ENSMUSG00000042446	4	red	Zmym4
ENSMUSG00000028631	4	red	Kcnq4
ENSMUSG00000038607	4	red	Gng10
ENSMUSG00000050390	4	red	C77080
ENSMUSG00000034573	4	red	Ptpn13
ENSMUSG00000029154	4	red	Cwh43
ENSMUSG00000059866	4	red	Tnip2
ENSMUSG00000029233	4	red	Srd5a3
ENSMUSG00000050248	4	red	Evc2
ENSMUSG00000028953	4	red	Abcf2
ENSMUSG00000035505	4	red	Cox18
ENSMUSG00000028945	4	red	Rheb
ENSMUSG00000039106	4	red	Htr5a
ENSMUSG00000045314	4	red	Sowahb
ENSMUSG00000029597	4	red	Sds
ENSMUSG00000029334	4	red	Prkg2
ENSMUSG00000042589	4	red	Cux2
ENSMUSG00000029674	4	red	Limk1
ENSMUSG00000007207	4	red	Stx1a
ENSMUSG00000005514	4	red	Por
ENSMUSG00000029705	4	red	Cux1
ENSMUSG00000025855	4	red	Prkar1b
ENSMUSG00000039623	4	red	Ap5z1
ENSMUSG00000029394	4	red	Cdk2ap1
ENSMUSG00000029389	4	red	Ddx55
ENSMUSG00000039358	4	red	Drd5
ENSMUSG00000000915	4	red	Hip1r
ENSMUSG00000053094	4	red	Tmem248
ENSMUSG00000058013	4	red	Septin11
ENSMUSG00000063015	4	red	Ccni
ENSMUSG00000037108	4	red	Zcwpw1
ENSMUSG00000054675	4	red	Tmem119
ENSMUSG00000048794	4	red	Cfap100
ENSMUSG00000029797	4	red	Sspo
ENSMUSG00000053297	4	red	AI854703
ENSMUSG00000030098	4	red	Grip2
ENSMUSG00000029814	4	red	Igf2bp3
ENSMUSG00000048776	4	red	Pthlh
ENSMUSG00000030303	4	red	Far2
ENSMUSG00000014554	4	red	Dguok
ENSMUSG00000010797	4	red	Wnt2
ENSMUSG00000035357	4	red	Pdzrn3
ENSMUSG00000029780	4	red	Nt5c3
ENSMUSG00000037788	4	red	Vopp1
ENSMUSG00000053004	4	red	Hrh1
ENSMUSG00000000440	4	red	Pparg
ENSMUSG00000030123	4	red	Plxnd1
ENSMUSG00000024104	4	red	Washc2
ENSMUSG00000089862	4	red	Umad1
ENSMUSG00000046733	4	red	Gprc5a
ENSMUSG00000074165	4	red	Zfp788
ENSMUSG00000073838	4	red	Tufm
ENSMUSG00000064023	4	red	Klk8
ENSMUSG00000031026	4	red	Trim66
ENSMUSG00000038371	4	red	Sbf2
ENSMUSG00000011267	4	red	Zfp296
ENSMUSG00000035642	4	red	Aamdc
ENSMUSG00000030774	4	red	Pak1
ENSMUSG00000018909	4	red	Arrb1
ENSMUSG00000030393	4	red	Zik1
ENSMUSG00000030965	4	red	Abraxas2
ENSMUSG00000036578	4	red	Fxyd7
ENSMUSG00000046321	4	red	Hs3st2
ENSMUSG00000063931	4	red	Pepd
ENSMUSG00000021217	4	red	Tshz3
ENSMUSG00000025147	4	red	Mob2
ENSMUSG00000006019	4	red	Dhx34
ENSMUSG00000030898	4	red	Cckbr
ENSMUSG00000097075	4	red	Cdiptos
ENSMUSG00000051457	4	red	Spn
ENSMUSG00000030792	4	red	Dkkl1
ENSMUSG00000020032	4	red	Nuak1
ENSMUSG00000019791	4	red	Hint3
ENSMUSG00000020070	4	red	Rufy2
ENSMUSG00000039485	4	red	Tspyl4
ENSMUSG00000020061	4	red	Mybpc1
ENSMUSG00000019935	4	red	Slc17a8
ENSMUSG00000052302	4	red	Tbc1d30
ENSMUSG00000025795	4	red	Rassf3
ENSMUSG00000038417	4	red	Fig4
ENSMUSG00000040258	4	red	Nxph4
ENSMUSG00000037747	4	red	Phyhipl
ENSMUSG00000025400	4	red	Tac2
ENSMUSG00000019906	4	red	Lin7a
ENSMUSG00000019772	4	red	Vip
ENSMUSG00000019775	4	red	Rgs17
ENSMUSG00000020086	4	red	Macroh2a2
ENSMUSG00000039166	4	red	Akap7
ENSMUSG00000006342	4	red	Susd2
ENSMUSG00000001151	4	red	Pcnt
ENSMUSG00000059406	4	red	Tmprss9
ENSMUSG00000034612	4	red	Chst11
ENSMUSG00000034758	4	red	Tle6
ENSMUSG00000064065	4	red	Ipcef1
ENSMUSG00000078908	4	red	Mon1b
ENSMUSG00000008167	4	red	Fbxw9
ENSMUSG00000059897	4	red	Zfp930
ENSMUSG00000031781	4	red	Ciapin1
ENSMUSG00000063626	4	red	Unc5d
ENSMUSG00000031872	4	red	Bean1
ENSMUSG00000031513	4	red	Leprotl1
ENSMUSG00000031654	4	red	Cbln1
ENSMUSG00000050222	4	red	Il17d
ENSMUSG00000005148	4	red	Klf5
ENSMUSG00000021974	4	red	Fgf9
ENSMUSG00000021990	4	red	Spata13
ENSMUSG00000021993	4	red	Mipep
ENSMUSG00000035184	4	red	Fam124a
ENSMUSG00000021772	4	red	Nkiras1
ENSMUSG00000059974	4	red	Ntm
ENSMUSG00000032033	4	red	Barx2
ENSMUSG00000035934	4	red	Pknox2
ENSMUSG00000032121	4	red	Tmem218
ENSMUSG00000031870	4	red	Pgr
ENSMUSG00000039714	4	red	Cplx3
ENSMUSG00000047606	4	red	Ankrd34c
ENSMUSG00000025235	4	red	Bbs4
ENSMUSG00000032172	4	red	Olfm2
ENSMUSG00000074259	4	red	Gramd2
ENSMUSG00000032175	4	red	Tyk2
ENSMUSG00000070287	4	red	Slc35g2
ENSMUSG00000050074	4	red	Spink8
ENSMUSG00000032553	4	red	Srprb
ENSMUSG00000032479	4	red	Map4
ENSMUSG00000013822	4	red	Elof1
ENSMUSG00000033629	4	red	Hacd3
ENSMUSG00000035443	4	red	Thyn1
ENSMUSG00000040875	4	red	Osbpl10
ENSMUSG00000032437	4	red	Stt3b
ENSMUSG00000032224	4	red	Fam81a
ENSMUSG00000042787	4	red	Exog
ENSMUSG00000042688	4	red	Mapk6
ENSMUSG00000025240	4	red	Sacm1l
ENSMUSG00000034275	4	red	Igsf9b
ENSMUSG00000038775	4	red	Vill
ENSMUSG00000034563	4	red	Ccpg1
ENSMUSG00000001833	4	red	Septin7
ENSMUSG00000032400	4	red	Zwilch
ENSMUSG00000038366	4	red	Lasp1
ENSMUSG00000017417	4	red	Plxdc1
ENSMUSG00000017400	4	red	Stac2
ENSMUSG00000017781	4	red	Pitpna
ENSMUSG00000007877	4	red	Tcap
ENSMUSG00000037992	4	red	Rara
ENSMUSG00000017493	4	red	Igfbp4
ENSMUSG00000073063	4	red	Hbq1b
ENSMUSG00000010803	4	red	Gabra1
ENSMUSG00000044950	4	red	Pwwp2a
ENSMUSG00000039976	4	red	Tbc1d16
ENSMUSG00000046417	4	red	Lrrc75a
ENSMUSG00000001103	4	red	Sebox
ENSMUSG00000017376	4	red	Nlk
ENSMUSG00000033196	4	red	Myh2
ENSMUSG00000057003	4	red	Myh4
ENSMUSG00000020905	4	red	Usp43
ENSMUSG00000087242	4	red	C78197
ENSMUSG00000025163	4	red	Cd7
ENSMUSG00000061086	4	red	Myl4
ENSMUSG00000018405	4	red	Mrm1
ENSMUSG00000020694	4	red	Tlk2
ENSMUSG00000018565	4	red	Elp5
ENSMUSG00000009073	4	red	Nf2
ENSMUSG00000069769	4	red	Msi2
ENSMUSG00000056158	4	red	Car10
ENSMUSG00000047904	4	red	Sstr2
ENSMUSG00000020173	4	red	Cobl
ENSMUSG00000075595	4	red	Zfp652
ENSMUSG00000020937	4	red	Plcd3
ENSMUSG00000056895	4	red	H2bc27
ENSMUSG00000038268	4	red	Ovca2
ENSMUSG00000078789	4	red	Dph1
ENSMUSG00000033857	4	red	Engase
ENSMUSG00000041817	4	red	Fam169a
ENSMUSG00000021366	4	red	Hivep1
ENSMUSG00000021337	4	red	Scgn
ENSMUSG00000034751	4	red	Mast4
ENSMUSG00000021587	4	red	Pcsk1
ENSMUSG00000001542	4	red	Ell2
ENSMUSG00000034987	4	red	Hrh2
ENSMUSG00000035834	4	red	Polr3g
ENSMUSG00000021699	4	red	Pde4d
ENSMUSG00000005583	4	red	Mef2c
ENSMUSG00000021615	4	red	Xrcc4
ENSMUSG00000087334	4	red	AW495222
ENSMUSG00000021271	4	red	Zfp839
ENSMUSG00000048483	4	red	Zdhhc22
ENSMUSG00000020644	4	red	Id2
ENSMUSG00000047446	4	red	Arl4a
ENSMUSG00000021209	4	red	Ppp4r4
ENSMUSG00000042724	4	red	Map3k9
ENSMUSG00000054459	4	red	Vsnl1
ENSMUSG00000037679	4	red	Inf2
ENSMUSG00000051726	4	red	Kcnf1
ENSMUSG00000021224	4	red	Numb
ENSMUSG00000043487	4	red	Acot6
ENSMUSG00000062373	4	red	Tmem65
ENSMUSG00000022442	4	red	Ttll1
ENSMUSG00000022377	4	red	Asap1
ENSMUSG00000015002	4	red	Efr3a
ENSMUSG00000035900	4	red	Gramd4
ENSMUSG00000040420	4	red	Cdh18
ENSMUSG00000045996	4	red	Polr2k
ENSMUSG00000047591	4	red	Mafa
ENSMUSG00000048218	4	red	Amigo2
ENSMUSG00000023046	4	red	Igfbp6
ENSMUSG00000009035	4	red	Tmem184b
ENSMUSG00000068117	4	red	Mei1
ENSMUSG00000063704	4	red	Mapk15
ENSMUSG00000016942	4	red	Tmprss6
ENSMUSG00000019080	4	red	Mfsd3
ENSMUSG00000054855	4	red	Rnd1
ENSMUSG00000037185	4	red	Krt80
ENSMUSG00000022376	4	red	Adcy8
ENSMUSG00000044117	4	red	Bmerb1
ENSMUSG00000036292	4	red	Gramd1c
ENSMUSG00000022661	4	red	Cd200
ENSMUSG00000087141	4	red	Plcxd2
ENSMUSG00000035107	4	red	Dcbld2
ENSMUSG00000051146	4	red	Camk2n2
ENSMUSG00000013089	4	red	Etv5
ENSMUSG00000022510	4	red	Trp63
ENSMUSG00000022523	4	red	Fgf12
ENSMUSG00000022537	4	red	Tmem44
ENSMUSG00000022770	4	red	Dlg1
ENSMUSG00000022900	4	red	Ildr1
ENSMUSG00000022721	4	red	Trmt2a
ENSMUSG00000024135	4	red	Srbd1
ENSMUSG00000023927	4	red	Satb1
ENSMUSG00000024085	4	red	Man2a1
ENSMUSG00000023805	4	red	Synj2
ENSMUSG00000095687	4	red	Rnaset2a
ENSMUSG00000039153	4	red	Runx2
ENSMUSG00000040688	4	red	Tbl3
ENSMUSG00000063011	4	red	Msln
ENSMUSG00000073423	4	red	Zfp414
ENSMUSG00000059208	4	red	Hnrnpm
ENSMUSG00000058152	4	red	Chsy3
ENSMUSG00000024613	4	red	Tcof1
ENSMUSG00000034295	4	red	Fhod3
ENSMUSG00000033871	4	red	Ppargc1b
ENSMUSG00000045629	4	red	Sh3tc2
ENSMUSG00000014503	4	red	Pkd2l2
ENSMUSG00000024526	4	red	Cidea
ENSMUSG00000024425	4	red	Ndfip1
ENSMUSG00000024500	4	red	Ppp2r2b
ENSMUSG00000071855	4	red	Ccdc112
ENSMUSG00000073565	4	red	Prr16
ENSMUSG00000024513	4	red	Mbd2
ENSMUSG00000041225	4	red	Arhgap12
ENSMUSG00000024430	4	red	Cabyr
ENSMUSG00000044252	4	red	Osbpl1a
ENSMUSG00000037013	4	red	Ss18
ENSMUSG00000120124	4	red	ENSMUSG00000120124
ENSMUSG00000024570	4	red	Rbfa
ENSMUSG00000024846	4	red	Cst6
ENSMUSG00000039148	4	red	Sart1
ENSMUSG00000052942	4	red	Glis3
ENSMUSG00000024774	4	red	Ankrd22
ENSMUSG00000032648	4	red	Pygm
ENSMUSG00000053279	4	red	Aldh1a1
ENSMUSG00000026604	5	darkgreen	Ptpn14
ENSMUSG00000033774	5	darkgreen	Npbwr1
ENSMUSG00000025950	5	darkgreen	Idh1
ENSMUSG00000040612	5	darkgreen	Ildr2
ENSMUSG00000014852	5	darkgreen	Adamts13
ENSMUSG00000075270	5	darkgreen	Pde11a
ENSMUSG00000074575	5	darkgreen	Kcng1
ENSMUSG00000074939	5	darkgreen	Chrm5
ENSMUSG00000109946	5	darkgreen	Brd3os
ENSMUSG00000025266	5	darkgreen	Gnl3l
ENSMUSG00000031391	5	darkgreen	L1cam
ENSMUSG00000045284	5	darkgreen	Dcaf12l1
ENSMUSG00000041633	5	darkgreen	Kctd12b
ENSMUSG00000033578	5	darkgreen	Tmem35a
ENSMUSG00000062168	5	darkgreen	Ppef1
ENSMUSG00000042425	5	darkgreen	Frmpd3
ENSMUSG00000031380	5	darkgreen	Vegfd
ENSMUSG00000025630	5	darkgreen	Hprt
ENSMUSG00000036357	5	darkgreen	Gpr101
ENSMUSG00000040896	5	darkgreen	Kcnd3
ENSMUSG00000037610	5	darkgreen	Kcnmb2
ENSMUSG00000028328	5	darkgreen	Tmod1
ENSMUSG00000039579	5	darkgreen	Grin3a
ENSMUSG00000005672	5	darkgreen	Kit
ENSMUSG00000025857	5	darkgreen	Dnaaf5
ENSMUSG00000033174	5	darkgreen	Mgll
ENSMUSG00000030282	5	darkgreen	Cmas
ENSMUSG00000049112	5	darkgreen	Oxtr
ENSMUSG00000073209	5	darkgreen	Klf14
ENSMUSG00000030551	5	darkgreen	Nr2f2
ENSMUSG00000037469	5	darkgreen	Acp7
ENSMUSG00000048078	5	darkgreen	Tenm4
ENSMUSG00000058420	5	darkgreen	Syt17
ENSMUSG00000030956	5	darkgreen	Fam53b
ENSMUSG00000091002	5	darkgreen	Tcerg1l
ENSMUSG00000019927	5	darkgreen	Ube2d1
ENSMUSG00000020090	5	darkgreen	Npffr1
ENSMUSG00000019817	5	darkgreen	Plagl1
ENSMUSG00000044770	5	darkgreen	Scml4
ENSMUSG00000045912	5	darkgreen	C2cd4c
ENSMUSG00000033763	5	darkgreen	Mtss2
ENSMUSG00000033633	5	darkgreen	Clec18a
ENSMUSG00000096914	5	darkgreen	Galntl6
ENSMUSG00000034361	5	darkgreen	Cpne2
ENSMUSG00000039057	5	darkgreen	Myo16
ENSMUSG00000034796	5	darkgreen	Cpne7
ENSMUSG00000030662	5	darkgreen	Ipo5
ENSMUSG00000034532	5	darkgreen	Fbxo16
ENSMUSG00000040618	5	darkgreen	Pck2
ENSMUSG00000037493	5	darkgreen	Cib2
ENSMUSG00000032417	5	darkgreen	Rwdd2a
ENSMUSG00000006932	5	darkgreen	Ctnnb1
ENSMUSG00000066357	5	darkgreen	Wdr6
ENSMUSG00000020612	5	darkgreen	Prkar1a
ENSMUSG00000020427	5	darkgreen	Igfbp3
ENSMUSG00000042826	5	darkgreen	Fgf11
ENSMUSG00000021338	5	darkgreen	Carmil1
ENSMUSG00000036006	5	darkgreen	Ripor2
ENSMUSG00000021730	5	darkgreen	Hcn1
ENSMUSG00000035431	5	darkgreen	Sstr1
ENSMUSG00000041481	5	darkgreen	Serpina3g
ENSMUSG00000075707	5	darkgreen	Dio3
ENSMUSG00000113581	5	darkgreen	Dio3os
ENSMUSG00000022577	5	darkgreen	Ly6h
ENSMUSG00000067594	5	darkgreen	Krt77
ENSMUSG00000049148	5	darkgreen	Plcxd3
ENSMUSG00000022864	5	darkgreen	D16Ertd472e
ENSMUSG00000079657	5	darkgreen	Rab26
ENSMUSG00000042514	5	darkgreen	Klhl14
ENSMUSG00000073600	5	darkgreen	Prob1
ENSMUSG00000025880	5	darkgreen	Smad7
ENSMUSG00000042401	5	darkgreen	Crtac1
ENSMUSG00000024740	5	darkgreen	Ddb1
ENSMUSG00000058624	5	darkgreen	Gda
ENSMUSG00000045968	6	pink	Teddm2
ENSMUSG00000026470	6	pink	Stx6
ENSMUSG00000036766	6	pink	Dner
ENSMUSG00000026347	6	pink	Tmem163
ENSMUSG00000058267	6	pink	Mrps14
ENSMUSG00000014226	6	pink	Cacybp
ENSMUSG00000026028	6	pink	Trak2
ENSMUSG00000040265	6	pink	Dnm3
ENSMUSG00000026123	6	pink	Plekhb2
ENSMUSG00000009633	6	pink	G0s2
ENSMUSG00000052534	6	pink	Pbx1
ENSMUSG00000062209	6	pink	Erbb4
ENSMUSG00000018196	6	pink	Glrx2
ENSMUSG00000026546	6	pink	Cfap45
ENSMUSG00000042901	6	pink	Aida
ENSMUSG00000026205	6	pink	Slc23a3
ENSMUSG00000026074	6	pink	Map4k4
ENSMUSG00000026463	6	pink	Atp2b4
ENSMUSG00000015488	6	pink	Cacfd1
ENSMUSG00000009216	6	pink	Fam163b
ENSMUSG00000006494	6	pink	Pdk1
ENSMUSG00000010505	6	pink	Myt1
ENSMUSG00000027247	6	pink	Arhgap1
ENSMUSG00000067787	6	pink	Blcap
ENSMUSG00000067786	6	pink	Nnat
ENSMUSG00000069132	6	pink	Nxph2
ENSMUSG00000053141	6	pink	Ptprt
ENSMUSG00000074607	6	pink	Tox2
ENSMUSG00000027371	6	pink	Fahd2a
ENSMUSG00000079051	6	pink	Vinac1
ENSMUSG00000027399	6	pink	Il1a
ENSMUSG00000027540	6	pink	Ptpn1
ENSMUSG00000074766	6	pink	Ism1
ENSMUSG00000026890	6	pink	Lhx6
ENSMUSG00000074923	6	pink	Pak6
ENSMUSG00000052155	6	pink	Acvr2a
ENSMUSG00000026904	6	pink	Slc4a10
ENSMUSG00000027014	6	pink	Cwc22
ENSMUSG00000027411	6	pink	Vps16
ENSMUSG00000074736	6	pink	Syndig1
ENSMUSG00000026773	6	pink	Pfkfb3
ENSMUSG00000015846	6	pink	Rxra
ENSMUSG00000075316	6	pink	Scn9a
ENSMUSG00000041380	6	pink	Htr2c
ENSMUSG00000031343	6	pink	Gabra3
ENSMUSG00000002012	6	pink	Pnck
ENSMUSG00000025264	6	pink	Tsr2
ENSMUSG00000041658	6	pink	Rragb
ENSMUSG00000041649	6	pink	Klf8
ENSMUSG00000049804	6	pink	Armcx4
ENSMUSG00000055653	6	pink	Gpc3
ENSMUSG00000031382	6	pink	Asb11
ENSMUSG00000018589	6	pink	Glra2
ENSMUSG00000031342	6	pink	Gpm6b
ENSMUSG00000057421	6	pink	Las1l
ENSMUSG00000006373	6	pink	Pgrmc1
ENSMUSG00000072966	6	pink	Gprasp2
ENSMUSG00000001127	6	pink	Araf
ENSMUSG00000027676	6	pink	Ccdc39
ENSMUSG00000028132	6	pink	Tlcd4
ENSMUSG00000038975	6	pink	Rabggtb
ENSMUSG00000040086	6	pink	Tnni3k
ENSMUSG00000027742	6	pink	Cog6
ENSMUSG00000028031	6	pink	Dkk2
ENSMUSG00000044365	6	pink	Cxxc4
ENSMUSG00000028172	6	pink	Tacr3
ENSMUSG00000028152	6	pink	Tspan5
ENSMUSG00000004035	6	pink	Gstm7
ENSMUSG00000027887	6	pink	Sypl2
ENSMUSG00000027883	6	pink	Gpsm2
ENSMUSG00000040289	6	pink	Hey1
ENSMUSG00000015522	6	pink	Arnt
ENSMUSG00000056145	6	pink	AI504432
ENSMUSG00000028950	6	pink	Tas1r1
ENSMUSG00000039577	6	pink	Nphp4
ENSMUSG00000036856	6	pink	Wnt4
ENSMUSG00000028572	6	pink	Hook1
ENSMUSG00000033326	6	pink	Kdm4a
ENSMUSG00000028745	6	pink	Capzb
ENSMUSG00000040972	6	pink	Igsf21
ENSMUSG00000028796	6	pink	Phc2
ENSMUSG00000028456	6	pink	Unc13b
ENSMUSG00000085873	6	pink	Ttc39aos1
ENSMUSG00000033365	6	pink	Ipo13
ENSMUSG00000041000	6	pink	Trim62
ENSMUSG00000001260	6	pink	Gabrg1
ENSMUSG00000043388	6	pink	Tmem130
ENSMUSG00000054099	6	pink	Slc25a40
ENSMUSG00000041468	6	pink	Gpr12
ENSMUSG00000001687	6	pink	Ubl3
ENSMUSG00000043323	6	pink	Fbrsl1
ENSMUSG00000033294	6	pink	Noc4l
ENSMUSG00000041147	6	pink	Brca2
ENSMUSG00000029192	6	pink	Tbc1d14
ENSMUSG00000002944	6	pink	Cd36
ENSMUSG00000042249	6	pink	Grk3
ENSMUSG00000039782	6	pink	Cpeb2
ENSMUSG00000042453	6	pink	Reln
ENSMUSG00000039706	6	pink	Ldb2
ENSMUSG00000034981	6	pink	Parm1
ENSMUSG00000029108	6	pink	Pcdh7
ENSMUSG00000006641	6	pink	Slc5a6
ENSMUSG00000064037	6	pink	Gpn1
ENSMUSG00000049327	6	pink	Kmt5a
ENSMUSG00000005107	6	pink	Slc2a9
ENSMUSG00000066278	6	pink	Vps37b
ENSMUSG00000061898	6	pink	Rbak
ENSMUSG00000005907	6	pink	Pex1
ENSMUSG00000023284	6	pink	Zfp605
ENSMUSG00000004642	6	pink	Slbp
ENSMUSG00000068794	6	pink	Col28a1
ENSMUSG00000029629	6	pink	Phf14
ENSMUSG00000009376	6	pink	Met
ENSMUSG00000047976	6	pink	Kcna1
ENSMUSG00000030304	6	pink	Ergic2
ENSMUSG00000030352	6	pink	Tspan9
ENSMUSG00000045896	6	pink	Paip2b
ENSMUSG00000030188	6	pink	Magohb
ENSMUSG00000001763	6	pink	Tspan33
ENSMUSG00000051855	6	pink	Mest
ENSMUSG00000042097	6	pink	Zfp239
ENSMUSG00000042505	6	pink	Sdhaf3
ENSMUSG00000030298	6	pink	Sec13
ENSMUSG00000030310	6	pink	Slc6a1
ENSMUSG00000013367	6	pink	Iglon5
ENSMUSG00000030693	6	pink	Klk10
ENSMUSG00000038503	6	pink	Mesd
ENSMUSG00000015709	6	pink	Arnt2
ENSMUSG00000038695	6	pink	Josd2
ENSMUSG00000008140	6	pink	Emc10
ENSMUSG00000035596	6	pink	Mboat7
ENSMUSG00000015957	6	pink	Wnt11
ENSMUSG00000040136	6	pink	Abcc8
ENSMUSG00000030994	6	pink	D7Ertd443e
ENSMUSG00000055026	6	pink	Gabrg3
ENSMUSG00000025475	6	pink	Adgra1
ENSMUSG00000038623	6	pink	Tm6sf1
ENSMUSG00000053111	6	pink	Fank1
ENSMUSG00000025484	6	pink	Bet1l
ENSMUSG00000020042	6	pink	Abtb3
ENSMUSG00000019880	6	pink	Rspo3
ENSMUSG00000020048	6	pink	Hsp90b1
ENSMUSG00000075000	6	pink	Nrbf2
ENSMUSG00000074785	6	pink	Plxnc1
ENSMUSG00000019929	6	pink	Dcn
ENSMUSG00000019923	6	pink	Zwint
ENSMUSG00000019762	6	pink	Iyd
ENSMUSG00000058799	6	pink	Nap1l1
ENSMUSG00000020130	6	pink	Tbc1d15
ENSMUSG00000025359	6	pink	Pmel
ENSMUSG00000020085	6	pink	Aifm2
ENSMUSG00000019806	6	pink	Aig1
ENSMUSG00000019865	6	pink	Nmbr
ENSMUSG00000052613	6	pink	Pcdh15
ENSMUSG00000001663	6	pink	Gstt1
ENSMUSG00000020211	6	pink	Sf3a2
ENSMUSG00000025348	6	pink	Itga7
ENSMUSG00000112117	6	pink	Rmst
ENSMUSG00000035722	6	pink	Abca7
ENSMUSG00000070044	6	pink	Fam149a
ENSMUSG00000003848	6	pink	Nob1
ENSMUSG00000018796	6	pink	Acsl1
ENSMUSG00000031698	6	pink	Mylk3
ENSMUSG00000031835	6	pink	Mbtps1
ENSMUSG00000036180	6	pink	Gatad2a
ENSMUSG00000032939	6	pink	Nup93
ENSMUSG00000001300	6	pink	Efnb2
ENSMUSG00000046556	6	pink	Zfp319
ENSMUSG00000031887	6	pink	Tradd
ENSMUSG00000019470	6	pink	Xab2
ENSMUSG00000031562	6	pink	Dctd
ENSMUSG00000096188	6	pink	Cmtm4
ENSMUSG00000048281	6	pink	Dleu7
ENSMUSG00000045875	6	pink	Adra1a
ENSMUSG00000033595	6	pink	Lgi3
ENSMUSG00000021814	6	pink	Anxa7
ENSMUSG00000021798	6	pink	Ldb3
ENSMUSG00000021743	6	pink	Fezf2
ENSMUSG00000022180	6	pink	Slc7a8
ENSMUSG00000058443	6	pink	Rpl10-ps3
ENSMUSG00000032348	6	pink	Gsta4
ENSMUSG00000032320	6	pink	Rcn2
ENSMUSG00000032020	6	pink	Ubash3b
ENSMUSG00000038264	6	pink	Sema7a
ENSMUSG00000032127	6	pink	Vps11
ENSMUSG00000032537	6	pink	Ephb1
ENSMUSG00000066705	6	pink	Fxyd6
ENSMUSG00000036466	6	pink	Megf11
ENSMUSG00000032076	6	pink	Cadm1
ENSMUSG00000036611	6	pink	Eepd1
ENSMUSG00000040652	6	pink	Oaz2
ENSMUSG00000091956	6	pink	C2cd4b
ENSMUSG00000047990	6	pink	C2cd4a
ENSMUSG00000032199	6	pink	Polr2m
ENSMUSG00000003309	6	pink	Ap1m2
ENSMUSG00000038112	6	pink	AW551984
ENSMUSG00000032396	6	pink	Dis3l
ENSMUSG00000032422	6	pink	Snx14
ENSMUSG00000063564	6	pink	Col23a1
ENSMUSG00000000869	6	pink	Il4
ENSMUSG00000020435	6	pink	Osbp2
ENSMUSG00000048616	6	pink	Nog
ENSMUSG00000018293	6	pink	Pfn1
ENSMUSG00000020546	6	pink	Stxbp4
ENSMUSG00000018800	6	pink	Abca5
ENSMUSG00000020811	6	pink	Wscd1
ENSMUSG00000020176	6	pink	Grb10
ENSMUSG00000010554	6	pink	Mettl16
ENSMUSG00000047181	6	pink	Samd14
ENSMUSG00000001507	6	pink	Itga3
ENSMUSG00000017466	6	pink	Timp2
ENSMUSG00000020700	6	pink	Map3k3
ENSMUSG00000002058	6	pink	Unc119
ENSMUSG00000049807	6	pink	Arhgap23
ENSMUSG00000018415	6	pink	Gid4
ENSMUSG00000020393	6	pink	Kremen1
ENSMUSG00000020892	6	pink	Aloxe3
ENSMUSG00000021697	6	pink	Depdc1b
ENSMUSG00000021765	6	pink	Fst
ENSMUSG00000003992	6	pink	Ssbp2
ENSMUSG00000042118	6	pink	Bhmt2
ENSMUSG00000021303	6	pink	Gng4
ENSMUSG00000035509	6	pink	Fbxl21
ENSMUSG00000034761	6	pink	Map4k5
ENSMUSG00000040856	6	pink	Dlk1
ENSMUSG00000019969	6	pink	Psen1
ENSMUSG00000020657	6	pink	Dnajc27
ENSMUSG00000022490	6	pink	Ppp1r1a
ENSMUSG00000022353	6	pink	Mtss1
ENSMUSG00000041708	6	pink	Mpped1
ENSMUSG00000047497	6	pink	Adamts12
ENSMUSG00000022206	6	pink	Npr3
ENSMUSG00000022580	6	pink	Rhpn1
ENSMUSG00000038760	6	pink	Trhr
ENSMUSG00000037362	6	pink	Ccn3
ENSMUSG00000022994	6	pink	Adcy6
ENSMUSG00000010601	6	pink	Apol7a
ENSMUSG00000046834	6	pink	Krt1
ENSMUSG00000022472	6	pink	Desi1
ENSMUSG00000033728	6	pink	Lrrc14
ENSMUSG00000003355	6	pink	Fkbp11
ENSMUSG00000099083	6	pink	Atf7
ENSMUSG00000039929	6	pink	Urb1
ENSMUSG00000047261	6	pink	Gap43
ENSMUSG00000022742	6	pink	Cpox
ENSMUSG00000022722	6	pink	Arl6
ENSMUSG00000041205	6	pink	Map6d1
ENSMUSG00000022935	6	pink	Grik1
ENSMUSG00000005982	6	pink	Naa60
ENSMUSG00000022715	6	pink	Tmem114
ENSMUSG00000022771	6	pink	Ppil2
ENSMUSG00000024150	6	pink	Mcfd2
ENSMUSG00000034998	6	pink	Foxn2
ENSMUSG00000048915	6	pink	Efna5
ENSMUSG00000024099	6	pink	Ndufv2
ENSMUSG00000091636	6	pink	Akain1
ENSMUSG00000015659	6	pink	Serac1
ENSMUSG00000055471	6	pink	Alk
ENSMUSG00000024067	6	pink	Dpy30
ENSMUSG00000023960	6	pink	Enpp5
ENSMUSG00000023966	6	pink	Rsph9
ENSMUSG00000048905	6	pink	Bnip5
ENSMUSG00000041119	6	pink	Pde9a
ENSMUSG00000007029	6	pink	Vars
ENSMUSG00000050875	6	pink	Minar2
ENSMUSG00000024381	6	pink	Bin1
ENSMUSG00000024517	6	pink	Grp
ENSMUSG00000023036	6	pink	Pcdhgc4
ENSMUSG00000024454	6	pink	Hdac3
ENSMUSG00000038524	6	pink	Fchsd1
ENSMUSG00000036452	6	pink	Arhgap26
ENSMUSG00000024261	6	pink	Syt4
ENSMUSG00000025081	6	pink	Tdrd1
ENSMUSG00000057858	6	pink	Fam204a
ENSMUSG00000024968	6	pink	Rcor2
ENSMUSG00000024664	6	pink	Fads3
ENSMUSG00000039126	6	pink	Prune2
ENSMUSG00000033717	6	pink	Adra2a
ENSMUSG00000087095	6	pink	Emx2os
ENSMUSG00000025207	6	pink	Sema4g
ENSMUSG00000071646	6	pink	Mta2
ENSMUSG00000015961	7	skyblue	Adss
ENSMUSG00000041439	7	skyblue	Mfsd6
ENSMUSG00000026155	7	skyblue	Smap1
ENSMUSG00000040710	7	skyblue	St8sia4
ENSMUSG00000037860	7	skyblue	Aim2
ENSMUSG00000025949	7	skyblue	Pikfyve
ENSMUSG00000079110	7	skyblue	Capn3
ENSMUSG00000031432	7	skyblue	Prps1
ENSMUSG00000031314	7	skyblue	Taf1
ENSMUSG00000043384	7	skyblue	Gprasp1
ENSMUSG00000028035	7	skyblue	Dnajb4
ENSMUSG00000053192	7	skyblue	Mllt11
ENSMUSG00000038486	7	skyblue	Sv2a
ENSMUSG00000027534	7	skyblue	Snx16
ENSMUSG00000036362	7	skyblue	P2ry13
ENSMUSG00000050192	7	skyblue	Eif5a2
ENSMUSG00000028088	7	skyblue	Fmo5
ENSMUSG00000019710	7	skyblue	Mrpl24
ENSMUSG00000028614	7	skyblue	Ndc1
ENSMUSG00000060371	7	skyblue	Caln1
ENSMUSG00000029167	7	skyblue	Ppargc1a
ENSMUSG00000063919	7	skyblue	Srrm4
ENSMUSG00000029729	7	skyblue	Zkscan1
ENSMUSG00000093536	7	skyblue	Smim17
ENSMUSG00000020114	7	skyblue	Cand1
ENSMUSG00000038302	7	skyblue	Afg1l
ENSMUSG00000036168	7	skyblue	Ccdc38
ENSMUSG00000038039	7	skyblue	Gcc2
ENSMUSG00000063605	7	skyblue	Ccdc102a
ENSMUSG00000035559	7	skyblue	Mpv17l2
ENSMUSG00000044676	7	skyblue	Zfp612
ENSMUSG00000058126	7	skyblue	Tpm3-rs7
ENSMUSG00000062762	7	skyblue	Ei24
ENSMUSG00000032177	7	skyblue	Pde4a
ENSMUSG00000025646	7	skyblue	Atrip
ENSMUSG00000019659	7	skyblue	Ccdc12
ENSMUSG00000032673	7	skyblue	Prorsd1
ENSMUSG00000049336	7	skyblue	Tenm2
ENSMUSG00000025132	7	skyblue	Arhgdia
ENSMUSG00000034285	7	skyblue	Nipsnap1
ENSMUSG00000020474	7	skyblue	Polm
ENSMUSG00000020413	7	skyblue	Hus1
ENSMUSG00000009210	7	skyblue	Prr29
ENSMUSG00000035936	7	skyblue	Aldh5a1
ENSMUSG00000051627	7	skyblue	H1f4
ENSMUSG00000004151	7	skyblue	Etv1
ENSMUSG00000061477	7	skyblue	Rps7
ENSMUSG00000016946	7	skyblue	Kctd5
ENSMUSG00000024127	7	skyblue	Prepl
ENSMUSG00000052026	7	skyblue	Slc6a7
ENSMUSG00000067879	8	tan	Vxn
ENSMUSG00000057335	8	tan	Cep170
ENSMUSG00000004364	8	tan	Cul3
ENSMUSG00000056763	8	tan	Cspp1
ENSMUSG00000026150	8	tan	Mff
ENSMUSG00000003721	8	tan	Insig2
ENSMUSG00000026102	8	tan	Inpp1
ENSMUSG00000026623	8	tan	Lpgat1
ENSMUSG00000026585	8	tan	Kifap3
ENSMUSG00000026269	8	tan	Rnpepl1
ENSMUSG00000026319	8	tan	Relch
ENSMUSG00000025907	8	tan	Rb1cc1
ENSMUSG00000033849	8	tan	B3galt2
ENSMUSG00000044647	8	tan	Csrnp3
ENSMUSG00000002109	8	tan	Ddb2
ENSMUSG00000027104	8	tan	Atf2
ENSMUSG00000009207	8	tan	Lnpk
ENSMUSG00000039621	8	tan	Prex1
ENSMUSG00000034723	8	tan	Tmx4
ENSMUSG00000027273	8	tan	Snap25
ENSMUSG00000040133	8	tan	Gpr176
ENSMUSG00000027438	8	tan	Napb
ENSMUSG00000035236	8	tan	Scai
ENSMUSG00000085438	8	tan	Oip5os1
ENSMUSG00000075318	8	tan	Scn2a
ENSMUSG00000062070	8	tan	Pgk1
ENSMUSG00000031242	8	tan	Chmp1b2
ENSMUSG00000025531	8	tan	Chm
ENSMUSG00000025860	8	tan	Xiap
ENSMUSG00000016150	8	tan	Tenm1
ENSMUSG00000046550	8	tan	Spin2c
ENSMUSG00000041552	8	tan	Ptchd1
ENSMUSG00000045427	8	tan	Hnrnph2
ENSMUSG00000067194	8	tan	Eif1ax
ENSMUSG00000041020	8	tan	Map7d2
ENSMUSG00000031299	8	tan	Pdha1
ENSMUSG00000031292	8	tan	Cdkl5
ENSMUSG00000040855	8	tan	Reps2
ENSMUSG00000031010	8	tan	Usp9x
ENSMUSG00000000838	8	tan	Fmr1
ENSMUSG00000035847	8	tan	Ids
ENSMUSG00000031422	8	tan	Morf4l2
ENSMUSG00000054942	8	tan	Miga1
ENSMUSG00000033883	8	tan	Zfp267
ENSMUSG00000033900	8	tan	Map9
ENSMUSG00000025757	8	tan	Hspa4l
ENSMUSG00000027500	8	tan	Stmn2
ENSMUSG00000028156	8	tan	Eif4e
ENSMUSG00000028149	8	tan	Rap1gds1
ENSMUSG00000002227	8	tan	Mov10
ENSMUSG00000042747	8	tan	Krtcap2
ENSMUSG00000037643	8	tan	Prkci
ENSMUSG00000028800	8	tan	Hdac1
ENSMUSG00000034636	8	tan	Zyg11b
ENSMUSG00000028557	8	tan	Rnf11
ENSMUSG00000047155	8	tan	Cyp4x1
ENSMUSG00000037295	8	tan	Ldlrap1
ENSMUSG00000028488	8	tan	Sh3gl2
ENSMUSG00000008489	8	tan	Elavl2
ENSMUSG00000028639	8	tan	Ybx1
ENSMUSG00000028528	8	tan	Dnajc6
ENSMUSG00000028246	8	tan	Faxc
ENSMUSG00000028300	8	tan	C9orf72
ENSMUSG00000028410	8	tan	Dnaja1
ENSMUSG00000055963	8	tan	Triqk
ENSMUSG00000035551	8	tan	Igfbpl1
ENSMUSG00000028312	8	tan	Smc2
ENSMUSG00000028719	8	tan	Cmpk1
ENSMUSG00000039740	8	tan	Alg2
ENSMUSG00000038630	8	tan	Zkscan16
ENSMUSG00000028431	8	tan	Elp1
ENSMUSG00000057572	8	tan	Zbtb8os
ENSMUSG00000029469	8	tan	Ift81
ENSMUSG00000029152	8	tan	Ociad1
ENSMUSG00000057614	8	tan	Gnai1
ENSMUSG00000035898	8	tan	Uba6
ENSMUSG00000029430	8	tan	Ran
ENSMUSG00000041870	8	tan	Ankrd13a
ENSMUSG00000029528	8	tan	Pxn
ENSMUSG00000029203	8	tan	Ube2k
ENSMUSG00000039959	8	tan	Hip1
ENSMUSG00000029703	8	tan	Lrwd1
ENSMUSG00000029250	8	tan	Polr2b
ENSMUSG00000030327	8	tan	Necap1
ENSMUSG00000052852	8	tan	Reep1
ENSMUSG00000030265	8	tan	Kras
ENSMUSG00000030061	8	tan	Uba3
ENSMUSG00000072872	8	tan	Rybp
ENSMUSG00000030075	8	tan	Cntn3
ENSMUSG00000030077	8	tan	Chl1
ENSMUSG00000029787	8	tan	Avl9
ENSMUSG00000062190	8	tan	Lancl2
ENSMUSG00000029840	8	tan	Mtpn
ENSMUSG00000055003	8	tan	Lrtm2
ENSMUSG00000030313	8	tan	Dennd5b
ENSMUSG00000096916	8	tan	Zfp850
ENSMUSG00000053025	8	tan	Sv2b
ENSMUSG00000068566	8	tan	Myadm
ENSMUSG00000078815	8	tan	Cacng6
ENSMUSG00000066232	8	tan	Ipo7
ENSMUSG00000038187	8	tan	Btbd10
ENSMUSG00000030432	8	tan	Rpl28
ENSMUSG00000030850	8	tan	Ate1
ENSMUSG00000030729	8	tan	Pgm2l1
ENSMUSG00000025477	8	tan	Inpp5a
ENSMUSG00000025326	8	tan	Ube3a
ENSMUSG00000025503	8	tan	Taldo1
ENSMUSG00000041420	8	tan	Meis3
ENSMUSG00000000605	8	tan	Clcn4
ENSMUSG00000108348	8	tan	Pnma8c
ENSMUSG00000038876	8	tan	Rnf146
ENSMUSG00000034667	8	tan	Xpot
ENSMUSG00000019877	8	tan	Serinc1
ENSMUSG00000019894	8	tan	Slc6a15
ENSMUSG00000020189	8	tan	Osbpl8
ENSMUSG00000035681	8	tan	Kcnc2
ENSMUSG00000062931	8	tan	Zfp938
ENSMUSG00000074781	8	tan	Ube2n
ENSMUSG00000023068	8	tan	Nus1
ENSMUSG00000058355	8	tan	Abce1
ENSMUSG00000031517	8	tan	Gpm6a
ENSMUSG00000004319	8	tan	Clcn3
ENSMUSG00000031703	8	tan	Itfg1
ENSMUSG00000006273	8	tan	Atp6v1b2
ENSMUSG00000043068	8	tan	Fam89a
ENSMUSG00000043251	8	tan	Exoc3l
ENSMUSG00000014778	8	tan	Fhod1
ENSMUSG00000049988	8	tan	Lrrc25
ENSMUSG00000021987	8	tan	Mtmr6
ENSMUSG00000021930	8	tan	Spryd7
ENSMUSG00000007989	8	tan	Fzd3
ENSMUSG00000022035	8	tan	Ccdc25
ENSMUSG00000025551	8	tan	Fgf14
ENSMUSG00000049295	8	tan	Zfp219
ENSMUSG00000022024	8	tan	Sugt1
ENSMUSG00000021940	8	tan	Ptpn20
ENSMUSG00000096001	8	tan	Gpr15lg
ENSMUSG00000041014	8	tan	Nrg3
ENSMUSG00000063142	8	tan	Kcnma1
ENSMUSG00000055538	8	tan	Zcchc24
ENSMUSG00000062257	8	tan	Opcml
ENSMUSG00000032279	8	tan	Idh3a
ENSMUSG00000034007	8	tan	Scaper
ENSMUSG00000058192	8	tan	Zfp846
ENSMUSG00000003131	8	tan	Pafah1b2
ENSMUSG00000004771	8	tan	Rab11a
ENSMUSG00000056724	8	tan	Nbeal2
ENSMUSG00000039285	8	tan	Azi2
ENSMUSG00000025899	8	tan	Alkbh8
ENSMUSG00000056342	8	tan	Usp34
ENSMUSG00000018167	8	tan	Stard3
ENSMUSG00000017776	8	tan	Crk
ENSMUSG00000072640	8	tan	Lyrm9
ENSMUSG00000033352	8	tan	Map2k4
ENSMUSG00000018651	8	tan	Tada2a
ENSMUSG00000047126	8	tan	Cltc
ENSMUSG00000048834	8	tan	Vstm2a
ENSMUSG00000020745	8	tan	Pafah1b1
ENSMUSG00000038534	8	tan	Osbpl7
ENSMUSG00000001441	8	tan	Npepps
ENSMUSG00000034255	8	tan	Arhgap27
ENSMUSG00000000804	8	tan	Usp32
ENSMUSG00000018481	8	tan	Appbp2
ENSMUSG00000021395	8	tan	Spin1
ENSMUSG00000021712	8	tan	Trim23
ENSMUSG00000021693	8	tan	Kif2a
ENSMUSG00000051098	8	tan	Mblac2
ENSMUSG00000021548	8	tan	Ccnh
ENSMUSG00000091264	8	tan	Smim13
ENSMUSG00000071281	8	tan	Zfp65
ENSMUSG00000042320	8	tan	Prox2
ENSMUSG00000020580	8	tan	Rock2
ENSMUSG00000020982	8	tan	Nemf
ENSMUSG00000021076	8	tan	Actr10
ENSMUSG00000019256	8	tan	Ahr
ENSMUSG00000034501	8	tan	Pcnx4
ENSMUSG00000021051	8	tan	Ppp2r5e
ENSMUSG00000020664	8	tan	Dld
ENSMUSG00000044912	8	tan	Syt16
ENSMUSG00000022240	8	tan	Ctnnd2
ENSMUSG00000022237	8	tan	Ankrd33b
ENSMUSG00000039100	8	tan	Marchf6
ENSMUSG00000038984	8	tan	Tspyl5
ENSMUSG00000022629	8	tan	Kif21a
ENSMUSG00000055022	8	tan	Cntn1
ENSMUSG00000022634	8	tan	Yaf2
ENSMUSG00000022295	8	tan	Atp6v1c1
ENSMUSG00000022812	8	tan	Gsk3b
ENSMUSG00000022678	8	tan	Nde1
ENSMUSG00000022674	8	tan	Ube2v2
ENSMUSG00000022789	8	tan	Dnm1l
ENSMUSG00000022762	8	tan	Ncam2
ENSMUSG00000022884	8	tan	Eif4a2
ENSMUSG00000022772	8	tan	Senp5
ENSMUSG00000024109	8	tan	Nrxn1
ENSMUSG00000036473	8	tan	Tbc1d24
ENSMUSG00000023832	8	tan	Acat2
ENSMUSG00000007570	8	tan	Fance
ENSMUSG00000042419	8	tan	Nfkbil1
ENSMUSG00000024446	8	tan	Rpp21
ENSMUSG00000024151	8	tan	Msh2
ENSMUSG00000054640	8	tan	Slc8a1
ENSMUSG00000005873	8	tan	Reep5
ENSMUSG00000071862	8	tan	Lrrtm2
ENSMUSG00000060450	8	tan	Rnf14
ENSMUSG00000024502	8	tan	Jakmip2
ENSMUSG00000024511	8	tan	Rab27b
ENSMUSG00000024283	8	tan	Wac
ENSMUSG00000047879	8	tan	Usp14
ENSMUSG00000037236	8	tan	Matr3
ENSMUSG00000024259	8	tan	Slc25a46
ENSMUSG00000024758	8	tan	Rtn3
ENSMUSG00000024661	8	tan	Fth1
ENSMUSG00000039652	8	tan	Cpeb3
ENSMUSG00000013663	8	tan	Pten
ENSMUSG00000025980	9	violet	Hspd1
ENSMUSG00000026709	9	violet	Dars2
ENSMUSG00000034032	9	violet	Rpap1
ENSMUSG00000050211	9	violet	Pla2g4e
ENSMUSG00000062646	9	violet	Ganc
ENSMUSG00000027288	9	violet	Zfp106
ENSMUSG00000033498	9	violet	Strc
ENSMUSG00000027246	9	violet	Ell3
ENSMUSG00000048222	9	violet	Mfap1b
ENSMUSG00000027236	9	violet	Eif3j1
ENSMUSG00000027227	9	violet	Sord
ENSMUSG00000033268	9	violet	Duox1
ENSMUSG00000040549	9	violet	Ckap5
ENSMUSG00000005804	9	violet	Bloc1s6
ENSMUSG00000027359	9	violet	Slc27a2
ENSMUSG00000003662	9	violet	Ciao1
ENSMUSG00000039834	9	violet	Zfp335
ENSMUSG00000027395	9	violet	Polr1b
ENSMUSG00000042670	9	violet	Immp1l
ENSMUSG00000027162	9	violet	Lin7c
ENSMUSG00000027342	9	violet	Pcna
ENSMUSG00000055943	9	violet	Emc7
ENSMUSG00000044042	9	violet	Fmn1
ENSMUSG00000040383	9	violet	Aqr
ENSMUSG00000057147	9	violet	Dph6
ENSMUSG00000027305	9	violet	Ndufaf1
ENSMUSG00000027198	9	violet	Ext2
ENSMUSG00000037773	9	violet	Pced1a
ENSMUSG00000027133	9	violet	Nop10
ENSMUSG00000074934	9	violet	Grem1
ENSMUSG00000023236	9	violet	Scg5
ENSMUSG00000027286	9	violet	Lrrc57
ENSMUSG00000027285	9	violet	Haus2
ENSMUSG00000027206	9	violet	Cops2
ENSMUSG00000027208	9	violet	Fgf7
ENSMUSG00000031220	9	violet	Awat2
ENSMUSG00000075700	9	violet	Selenot
ENSMUSG00000028911	9	violet	Srsf4
ENSMUSG00000044005	9	violet	Gls2
ENSMUSG00000043424	9	violet	Eif3j2
ENSMUSG00000067608	9	violet	Pcna-ps2
ENSMUSG00000026483	10	lightgreen	Niban1
ENSMUSG00000015484	10	lightgreen	Fam163a
ENSMUSG00000026185	10	lightgreen	Igfbp5
ENSMUSG00000003464	10	lightgreen	Pex19
ENSMUSG00000035513	10	lightgreen	Ntng2
ENSMUSG00000061689	10	lightgreen	Dlgap4
ENSMUSG00000039476	10	lightgreen	Prrx2
ENSMUSG00000035109	10	lightgreen	Shc4
ENSMUSG00000017740	10	lightgreen	Slc12a5
ENSMUSG00000026796	10	lightgreen	Niban2
ENSMUSG00000005510	10	lightgreen	Ndufs3
ENSMUSG00000027406	10	lightgreen	Idh3b
ENSMUSG00000023224	10	lightgreen	Serping1
ENSMUSG00000029419	10	lightgreen	Ajm1
ENSMUSG00000002006	10	lightgreen	Pdzd4
ENSMUSG00000054626	10	lightgreen	Xlr
ENSMUSG00000017057	10	lightgreen	Il13ra1
ENSMUSG00000028085	10	lightgreen	Gatb
ENSMUSG00000027737	10	lightgreen	Slc7a11
ENSMUSG00000027800	10	lightgreen	Tm4sf1
ENSMUSG00000027763	10	lightgreen	Mbnl1
ENSMUSG00000032902	10	lightgreen	Slc16a1
ENSMUSG00000004591	10	lightgreen	Pkn2
ENSMUSG00000042766	10	lightgreen	Trim46
ENSMUSG00000038612	10	lightgreen	Mcl1
ENSMUSG00000028108	10	lightgreen	Ecm1
ENSMUSG00000027950	10	lightgreen	Chrnb2
ENSMUSG00000004897	10	lightgreen	Hdgf
ENSMUSG00000044700	10	lightgreen	Tmem201
ENSMUSG00000043207	10	lightgreen	Zmpste24
ENSMUSG00000028228	10	lightgreen	Cpne3
ENSMUSG00000028567	10	lightgreen	Txndc12
ENSMUSG00000029298	10	lightgreen	Gbp9
ENSMUSG00000029096	10	lightgreen	Htra3
ENSMUSG00000046607	10	lightgreen	Hrk
ENSMUSG00000029712	10	lightgreen	Actl6b
ENSMUSG00000007655	10	lightgreen	Cav1
ENSMUSG00000029798	10	lightgreen	Herc6
ENSMUSG00000042389	10	lightgreen	Tsen2
ENSMUSG00000029994	10	lightgreen	Anxa4
ENSMUSG00000000627	10	lightgreen	Sema4f
ENSMUSG00000037541	10	lightgreen	Shank2
ENSMUSG00000030717	10	lightgreen	Nupr1
ENSMUSG00000015133	10	lightgreen	Lrrk1
ENSMUSG00000030410	10	lightgreen	Dmwd
ENSMUSG00000038156	10	lightgreen	Spon1
ENSMUSG00000042246	10	lightgreen	Tmc7
ENSMUSG00000056216	10	lightgreen	Cebpg
ENSMUSG00000001802	10	lightgreen	Lrp3
ENSMUSG00000032777	10	lightgreen	Gtf3c1
ENSMUSG00000040212	10	lightgreen	Emp3
ENSMUSG00000020057	10	lightgreen	Dram1
ENSMUSG00000019988	10	lightgreen	Nedd1
ENSMUSG00000019920	10	lightgreen	Lims1
ENSMUSG00000034818	10	lightgreen	Celf5
ENSMUSG00000006498	10	lightgreen	Ptbp1
ENSMUSG00000034949	10	lightgreen	Zfr2
ENSMUSG00000048827	10	lightgreen	Pkd1l3
ENSMUSG00000048644	10	lightgreen	Ctxn1
ENSMUSG00000031672	10	lightgreen	Got2
ENSMUSG00000031595	10	lightgreen	Pdgfrl
ENSMUSG00000031608	10	lightgreen	Galnt7
ENSMUSG00000031799	10	lightgreen	Tpm4
ENSMUSG00000031791	10	lightgreen	Tmem38a
ENSMUSG00000025809	10	lightgreen	Itgb1
ENSMUSG00000048379	10	lightgreen	Socs4
ENSMUSG00000022106	10	lightgreen	Rcbtb2
ENSMUSG00000036461	10	lightgreen	Elf1
ENSMUSG00000021824	10	lightgreen	Ap3m1
ENSMUSG00000037190	10	lightgreen	Cyb561d2
ENSMUSG00000032120	10	lightgreen	C2cd2l
ENSMUSG00000054693	10	lightgreen	Adam10
ENSMUSG00000025887	10	lightgreen	Casp12
ENSMUSG00000032265	10	lightgreen	Tent5a
ENSMUSG00000020467	10	lightgreen	Efemp1
ENSMUSG00000062312	10	lightgreen	Erbb2
ENSMUSG00000017210	10	lightgreen	Med24
ENSMUSG00000020289	10	lightgreen	Nprl3
ENSMUSG00000019302	10	lightgreen	Atp6v0a1
ENSMUSG00000078920	10	lightgreen	Ifi47
ENSMUSG00000017724	10	lightgreen	Etv4
ENSMUSG00000041695	10	lightgreen	Kcnj2
ENSMUSG00000080152	10	lightgreen	H3f4
ENSMUSG00000085208	10	lightgreen	Brip1os
ENSMUSG00000005204	10	lightgreen	Senp3
ENSMUSG00000020297	10	lightgreen	Nsg2
ENSMUSG00000057531	10	lightgreen	Dtnbp1
ENSMUSG00000021583	10	lightgreen	Erap1
ENSMUSG00000021460	10	lightgreen	Auh
ENSMUSG00000021408	10	lightgreen	Ripk1
ENSMUSG00000021540	10	lightgreen	Smad5
ENSMUSG00000021087	10	lightgreen	Rtn1
ENSMUSG00000041645	10	lightgreen	Ddx24
ENSMUSG00000021114	10	lightgreen	Atp6v1d
ENSMUSG00000059060	10	lightgreen	Rad51b
ENSMUSG00000021127	10	lightgreen	Zfp36l1
ENSMUSG00000001280	10	lightgreen	Sp1
ENSMUSG00000025612	10	lightgreen	Bach1
ENSMUSG00000022892	10	lightgreen	App
ENSMUSG00000024098	10	lightgreen	Twsg1
ENSMUSG00000001870	10	lightgreen	Ltbp1
ENSMUSG00000024456	10	lightgreen	Diaph1
ENSMUSG00000050370	10	lightgreen	Ch25h
ENSMUSG00000025189	10	lightgreen	Cnnm1
ENSMUSG00000006435	10	lightgreen	Neurl1a
ENSMUSG00000047216	11	turquoise	Cdh19
ENSMUSG00000070695	11	turquoise	Cntnap5a
ENSMUSG00000025911	11	turquoise	Adhfe1
ENSMUSG00000026047	11	turquoise	Poglut2
ENSMUSG00000026500	11	turquoise	Cox20
ENSMUSG00000026245	11	turquoise	Farsb
ENSMUSG00000026480	11	turquoise	Ncf2
ENSMUSG00000038949	11	turquoise	Cnst
ENSMUSG00000026249	11	turquoise	Serpine2
ENSMUSG00000042751	11	turquoise	Nmnat2
ENSMUSG00000041144	11	turquoise	Dnah7b
ENSMUSG00000026490	11	turquoise	Cdc42bpa
ENSMUSG00000026466	11	turquoise	Tor1aip1
ENSMUSG00000038855	11	turquoise	Itpkb
ENSMUSG00000048402	11	turquoise	Gli2
ENSMUSG00000005886	11	turquoise	Ncoa2
ENSMUSG00000004451	11	turquoise	Ralb
ENSMUSG00000025935	11	turquoise	Tram1
ENSMUSG00000026104	11	turquoise	Stat1
ENSMUSG00000060519	11	turquoise	Tor3a
ENSMUSG00000033557	11	turquoise	Fam20b
ENSMUSG00000032769	11	turquoise	Trpa1
ENSMUSG00000026387	11	turquoise	Sctr
ENSMUSG00000038776	11	turquoise	Ephx1
ENSMUSG00000026516	11	turquoise	Nvl
ENSMUSG00000026103	11	turquoise	Gls
ENSMUSG00000026339	11	turquoise	Ccdc93
ENSMUSG00000026094	11	turquoise	Stk17b
ENSMUSG00000052331	11	turquoise	Ankrd44
ENSMUSG00000026234	11	turquoise	Ncl
ENSMUSG00000041859	11	turquoise	Mcm3
ENSMUSG00000033488	11	turquoise	Cryzl2
ENSMUSG00000025978	11	turquoise	Rftn2
ENSMUSG00000026356	11	turquoise	Dars
ENSMUSG00000045382	11	turquoise	Cxcr4
ENSMUSG00000048495	11	turquoise	Tyw5
ENSMUSG00000039377	11	turquoise	Hlx
ENSMUSG00000026587	11	turquoise	Astn1
ENSMUSG00000064294	11	turquoise	Aox3
ENSMUSG00000016528	11	turquoise	Mapkapk2
ENSMUSG00000026615	11	turquoise	Eprs
ENSMUSG00000026259	11	turquoise	Ngef
ENSMUSG00000042349	11	turquoise	Ikbke
ENSMUSG00000026031	11	turquoise	Cflar
ENSMUSG00000026029	11	turquoise	Casp8
ENSMUSG00000004552	11	turquoise	Ctse
ENSMUSG00000026605	11	turquoise	Cenpf
ENSMUSG00000052688	11	turquoise	Rab7b
ENSMUSG00000042251	11	turquoise	Pm20d1
ENSMUSG00000013275	11	turquoise	Slc41a1
ENSMUSG00000026433	11	turquoise	Rab29
ENSMUSG00000026701	11	turquoise	Prdx6
ENSMUSG00000066595	11	turquoise	Flvcr1
ENSMUSG00000026628	11	turquoise	Atf3
ENSMUSG00000026627	11	turquoise	Pacc1
ENSMUSG00000037461	11	turquoise	Ints7
ENSMUSG00000041040	11	turquoise	Fam117b
ENSMUSG00000026018	11	turquoise	Ica1l
ENSMUSG00000049439	11	turquoise	Cyp20a1
ENSMUSG00000067081	11	turquoise	Asb18
ENSMUSG00000037503	11	turquoise	Fam168b
ENSMUSG00000047180	11	turquoise	Neurl3
ENSMUSG00000016494	11	turquoise	Cd34
ENSMUSG00000049515	11	turquoise	Espnl
ENSMUSG00000026571	11	turquoise	Dcaf6
ENSMUSG00000007805	11	turquoise	Twist2
ENSMUSG00000026566	11	turquoise	Mpzl1
ENSMUSG00000040723	11	turquoise	Rcsd1
ENSMUSG00000040713	11	turquoise	Creg1
ENSMUSG00000026271	11	turquoise	Gpr35
ENSMUSG00000025959	11	turquoise	Klf7
ENSMUSG00000073557	11	turquoise	Ppp1r12b
ENSMUSG00000051344	11	turquoise	Plekhm3
ENSMUSG00000014602	11	turquoise	Kif1a
ENSMUSG00000026275	11	turquoise	Ppp1r7
ENSMUSG00000052428	11	turquoise	Tmco1
ENSMUSG00000015222	11	turquoise	Map2
ENSMUSG00000070532	11	turquoise	Ccdc190
ENSMUSG00000026675	11	turquoise	Hsd17b7
ENSMUSG00000026277	11	turquoise	Stk25
ENSMUSG00000055567	11	turquoise	Unc80
ENSMUSG00000026279	11	turquoise	Thap4
ENSMUSG00000026005	11	turquoise	Rpe
ENSMUSG00000026003	11	turquoise	Acadl
ENSMUSG00000061816	11	turquoise	Myl1
ENSMUSG00000034000	11	turquoise	Neu4
ENSMUSG00000026285	11	turquoise	Pdcd1
ENSMUSG00000026659	11	turquoise	Dusp12
ENSMUSG00000026078	11	turquoise	Pdcl3
ENSMUSG00000026656	11	turquoise	Fcgr2b
ENSMUSG00000059089	11	turquoise	Fcgr4
ENSMUSG00000059498	11	turquoise	Fcgr3
ENSMUSG00000026196	11	turquoise	Bard1
ENSMUSG00000005674	11	turquoise	Tomm40l
ENSMUSG00000058715	11	turquoise	Fcer1g
ENSMUSG00000026321	11	turquoise	Tnfrsf11a
ENSMUSG00000026395	11	turquoise	Ptprc
ENSMUSG00000026187	11	turquoise	Xrcc5
ENSMUSG00000015355	11	turquoise	Cd48
ENSMUSG00000059058	11	turquoise	Tma7-ps
ENSMUSG00000007097	11	turquoise	Atp1a2
ENSMUSG00000044708	11	turquoise	Kcnj10
ENSMUSG00000026548	11	turquoise	Slamf9
ENSMUSG00000026547	11	turquoise	Tagln2
ENSMUSG00000053318	11	turquoise	Slamf8
ENSMUSG00000037849	11	turquoise	Ifi206
ENSMUSG00000073491	11	turquoise	Ifi213
ENSMUSG00000043263	11	turquoise	Ifi209
ENSMUSG00000073490	11	turquoise	Ifi207
ENSMUSG00000073489	11	turquoise	Ifi204
ENSMUSG00000026536	11	turquoise	Ifi211
ENSMUSG00000026527	11	turquoise	Rgs7
ENSMUSG00000026385	11	turquoise	Dbi
ENSMUSG00000026389	11	turquoise	Steap3
ENSMUSG00000038147	11	turquoise	Cd84
[truncated: 13,435 more rows]
