# Supplementary material for: Protein kinase CK2α’ as a dual modulator of neuroimmune signaling and synaptic dysfunction in Tauopathy
Source: Research Square preprint supplement (doi:10.21203/rs.3.rs-7078069/v1), 2025-08-07
Supplement: Supplementary file 4 [file fd15ad23cc63b1dbc06119e9.xlsx]

## Sheet: Comparison 1
Comparison 1		PS19 Vs WT			PS19 vs PS19;CK2α’(+/-)			PS19;CK2α’(+/-) vs WT
Ensembl	GeneSymbol	LogFC	p-value	q-value	LogFC	p-value	q-value	LogFC	p-value	q-value
ENSMUSG00000108348	Pnma8c	-0.384908	2.89e-09	1.13e-05	-0.254699	0.000120062	0.0410519	-0.134543	0.122321	0.393373
ENSMUSG00000034593	Myo5a	-0.304467	1e-06	0.000748564	-0.149761	0.018961	0.328951	-0.155364	0.00700035	0.0676618
ENSMUSG00000111375	Btbd8	-0.403458	1.08e-06	0.000766722	-0.191193	0.023995	0.344515	-0.215126	0.0110911	0.0928204
ENSMUSG00000086503	Xist	5.80022	2.07e-06	0.00108356	5.68241	3.77e-06	0.00500289	0.222692	NA	NA
ENSMUSG00000024500	Ppp2r2b	-0.324435	3.33e-06	0.00137652	-0.183289	0.0102469	0.276648	-0.142528	0.0292404	0.173197
ENSMUSG00000045083	Lingo2	-0.56623	5.19e-06	0.00189851	-0.29068	0.0221596	0.344011	-0.277395	0.0157549	0.117626
ENSMUSG00000091712	Sec14l5	0.868637	6.39e-06	0.00218133	0.460708	0.0185225	0.325762	0.41465	0.0306918	0.178116
ENSMUSG00000032262	Elovl4	-0.317883	8e-06	0.00246475	-0.151189	0.0373875	0.389761	-0.170036	0.0354167	0.194478
ENSMUSG00000064065	Ipcef1	-0.82186	8.33e-06	0.0025187	-0.397914	0.0355376	0.379408	-0.426128	0.0114866	0.0952593
ENSMUSG00000028557	Rnf11	-0.226151	1.28e-05	0.00320479	-0.165081	0.00184556	0.150228	-0.0631722	0.259553	0.576591
ENSMUSG00000040452	Cdh12	-0.599711	1.36e-05	0.00328615	-0.224384	0.112002	0.529926	-0.379816	0.00490866	0.0532726
ENSMUSG00000025920	Stau2	-0.259263	1.34e-05	0.00328615	-0.115397	0.0581206	0.43972	-0.14646	0.0282117	0.168964
ENSMUSG00000047879	Usp14	-0.291946	1.66e-05	0.00378767	-0.232826	0.000779516	0.0998367	-0.0623888	0.398548	0.703079
ENSMUSG00000031870	Pgr	-0.496948	2.25e-05	0.00460077	-0.229354	0.0560931	0.432154	-0.270394	0.0179511	0.127483
ENSMUSG00000032355	Mlip	-0.537004	2.72e-05	0.00496741	-0.261025	0.0462881	0.408203	-0.282014	0.0549435	0.252584
ENSMUSG00000027273	Snap25	-0.330157	2.85e-05	0.00509027	-0.152111	0.0602786	0.445352	-0.181216	0.0414289	0.215129
ENSMUSG00000030774	Pak1	-0.33011	3.11e-05	0.00543656	-0.262141	0.00125639	0.12298	-0.0713773	0.380198	0.689178
ENSMUSG00000048285	Frmd6	-0.507858	3.43e-05	0.00579806	-0.32587	0.00935291	0.271999	-0.185128	0.111961	0.374875
ENSMUSG00000047904	Sstr2	-0.782166	3.5e-05	0.00585691	-0.328361	0.0908923	0.504438	-0.451315	0.00865321	0.0783165
ENSMUSG00000062190	Lancl2	-0.274669	3.98e-05	0.00638695	-0.126889	0.0630465	0.45131	-0.151732	0.0404995	0.21194
ENSMUSG00000026821	Ralgds	0.311975	4.09e-05	0.00642333	0.151318	0.0508642	0.42088	0.161821	0.0228344	0.148122
ENSMUSG00000005583	Mef2c	-0.789169	4.32e-05	0.00665276	-0.493058	0.0127901	0.306888	-0.295511	0.0947443	0.341453
ENSMUSG00000075478	Slitrk1	-0.400032	4.72e-05	0.00696302	-0.136968	0.173988	0.602808	-0.26704	0.0141949	0.109938
ENSMUSG00000030465	Psd3	-0.399779	4.72e-05	0.00696302	-0.181718	0.0714786	0.469262	-0.220709	0.023925	0.152849
ENSMUSG00000085007	Smim43	-1.38749	4.77e-05	0.00696302	-0.812175	0.0205626	NA	-0.576643	0.0623485	0.271291
ENSMUSG00000037295	Ldlrap1	0.831299	5.3e-05	0.00724452	0.286706	0.158526	NA	0.555348	0.00735564	0.0701896
ENSMUSG00000050587	Lrrc4c	-0.375445	5.89e-05	0.00773816	-0.182515	0.056593	0.434565	-0.195649	0.0366213	0.198733
ENSMUSG00000067194	Eif1ax	-0.21739	6.6e-05	0.00810268	-0.148682	0.00756231	0.250256	-0.0708396	0.222497	0.531939
ENSMUSG00000030792	Dkkl1	-2.21594	6.48e-05	0.00810268	-1.80582	0.00156112	NA	-0.429015	0.380482	0.689423
ENSMUSG00000074781	Ube2n	-0.204043	6.41e-05	0.00810268	-0.23077	9.38e-06	0.00793217	0.0228671	0.731848	0.897547
ENSMUSG00000020821	Kif1c	0.349526	6.97e-05	0.00835832	0.172396	0.0548455	0.431076	0.178609	0.0298155	0.175291
ENSMUSG00000028528	Dnajc6	-0.255882	7.26e-05	0.00837168	-0.134975	0.0411729	0.400908	-0.123637	0.0875384	0.328001
ENSMUSG00000075318	Scn2a	-0.320785	7.63e-05	0.00856124	-0.127763	0.124483	0.542586	-0.195715	0.023076	0.149278
ENSMUSG00000034681	Rnps1	-0.827239	7.76e-05	0.00859006	-0.604817	0.00485962	0.206038	-0.225315	0.344033	0.658787
ENSMUSG00000074212	Dnajb14	-0.272895	7.75e-05	0.00859006	-0.216243	0.00219874	0.165933	-0.0584793	0.396797	0.701282
ENSMUSG00000035033	Tbr1	-0.702598	7.84e-05	0.00861574	-0.37835	0.0382124	0.391197	-0.328682	0.0506421	0.241799
ENSMUSG00000063142	Kcnma1	-0.328777	8.57e-05	0.00915811	-0.184739	0.0313141	0.376704	-0.146072	0.0807559	0.314349
ENSMUSG00000026527	Rgs7	-0.291764	8.52e-05	0.00915811	-0.167823	0.0267801	0.358839	-0.125916	0.0982484	0.348289
ENSMUSG00000022237	Ankrd33b	-0.407353	9.03e-05	0.00944546	-0.153044	0.151328	0.579698	-0.257064	0.0136251	0.106758
ENSMUSG00000040033	Stat2	0.460561	9.99e-05	0.0101085	0.194901	0.103275	0.521344	0.272403	0.0722839	0.296887
ENSMUSG00000033006	Sox10	0.717021	9.91e-05	0.0101085	0.567953	0.00258263	0.170325	0.152145	0.390877	0.696507
ENSMUSG00000024121	Atp6v0c	-0.688073	0.000103331	0.0103188	-0.543083	0.00282454	0.173826	-0.149583	0.480029	0.761255
ENSMUSG00000021936	Mapk8	-0.371158	0.000104558	0.0103342	-0.335154	0.000619627	0.0914589	-0.0390367	0.683789	0.875398
ENSMUSG00000027438	Napb	-0.225614	0.000108796	0.0105302	-0.19143	0.00135955	0.126776	-0.0366294	0.571248	0.815118
ENSMUSG00000048834	Vstm2a	-0.230595	0.000107328	0.0105302	-0.236969	9.58e-05	0.0390511	0.00162278	0.984297	0.993587
ENSMUSG00000036775	Decr2	-0.733162	0.000114683	0.0109121	-0.48194	0.0133852	0.306888	-0.256811	0.215149	0.523954
ENSMUSG00000032648	Pygm	-0.618251	0.000114845	0.0109121	-0.462653	0.00484135	0.206038	-0.15946	0.287885	0.60501
ENSMUSG00000103653	Gstp-ps	0.588429	0.000118546	0.0111554	0.447141	0.00317046	NA	0.152269	0.358047	0.669508
ENSMUSG00000037166	Ppp1r14a	0.837216	0.000121797	0.011205	0.487161	0.0277537	0.364008	0.353327	0.0818867	0.316171
ENSMUSG00000024109	Nrxn1	-0.270232	0.000123351	0.011205	-0.219609	0.00233702	0.165933	-0.0544221	0.523161	0.787638
ENSMUSG00000057614	Gnai1	-0.282654	0.000145121	0.0122984	-0.18115	0.017482	0.321466	-0.104728	0.188248	0.490887
ENSMUSG00000018398	Septin8	-0.130343	0.000149729	0.0125159	-0.0670577	0.0557157	0.432101	-0.064784	0.0814599	0.316039
ENSMUSG00000027562	Car2	0.451411	0.000158957	0.0130105	0.289194	0.0182188	0.323932	0.164462	0.15135	0.440487
ENSMUSG00000035847	Ids	-0.297222	0.000168895	0.0137523	-0.230206	0.00450689	0.199942	-0.0689763	0.374939	0.684569
ENSMUSG00000079109	Pms2	-0.375901	0.000169797	0.0137545	-0.234279	0.0208089	0.339816	-0.146739	0.164476	0.457202
ENSMUSG00000044252	Osbpl1a	-0.461777	0.000182755	0.014653	-0.190128	0.13323	0.554321	-0.272623	0.0157978	0.117786
ENSMUSG00000029108	Pcdh7	-0.407339	0.000191071	0.0148647	-0.150472	0.178937	0.60629	-0.25375	0.0179583	0.127483
ENSMUSG00000036473	Tbc1d24	-0.312459	0.000189011	0.0148647	-0.191689	0.0252097	0.349483	-0.12316	0.159724	0.450685
ENSMUSG00000019906	Lin7a	-0.555471	0.000190909	0.0148647	-0.41462	0.00638118	0.23454	-0.148494	0.314142	0.631623
ENSMUSG00000022678	Nde1	0.543262	0.00019418	0.0149585	0.194045	0.190185	0.613142	0.356627	0.0189204	0.131626
ENSMUSG00000035107	Dcbld2	-0.512939	0.000205612	0.0155346	-0.323212	0.0220626	0.343652	-0.195084	0.138879	0.422331
ENSMUSG00000033900	Map9	-0.2741	0.000204961	0.0155346	-0.173455	0.0216432	0.341858	-0.10235	0.166556	0.459416
ENSMUSG00000040260	Daam2	0.405822	0.000225641	0.0168855	0.113837	0.311623	0.727707	0.294896	0.0075531	0.0717417
ENSMUSG00000032224	Fam81a	-0.503437	0.00024704	0.0180697	-0.232032	0.0996508	0.514253	-0.274409	0.0320427	0.183181
ENSMUSG00000062604	Srpk2	-0.199059	0.000247785	0.0180697	-0.11317	0.0415804	0.402182	-0.0864634	0.0817078	0.31606
ENSMUSG00000000149	Gna12	0.399828	0.000256669	0.0183343	0.121972	0.275337	0.691124	0.279064	0.00599439	0.0611553
ENSMUSG00000003402	Prkcsh	0.229533	0.000262864	0.0186554	0.139098	0.0289958	0.367847	0.0920163	0.123802	0.395928
ENSMUSG00000042814	Mcts2	-0.569996	0.000271693	0.0190251	-0.454546	0.00401492	NA	-0.123845	0.428682	0.726677
ENSMUSG00000041225	Arhgap12	0.461261	0.000282457	0.0194685	0.176443	0.173734	0.602779	0.283965	0.0151185	0.114537
ENSMUSG00000053580	Tanc2	-0.306566	0.000304162	0.0206922	-0.118894	0.17166	0.60111	-0.18926	0.0203094	0.137347
ENSMUSG00000039740	Alg2	-0.165147	0.000310799	0.020755	-0.0745329	0.110648	0.528447	-0.0932914	0.0745008	0.301333
ENSMUSG00000054976	Nyap2	-0.309484	0.000313025	0.020755	-0.283714	0.0011323	0.115998	-0.0258581	0.736591	0.898803
ENSMUSG00000038187	Btbd10	-0.299386	0.000320925	0.0209267	-0.133365	0.1168	0.53654	-0.169461	0.0596094	0.264664
ENSMUSG00000037727	Avp	4.40816	0.000326812	0.0211687	3.74299	0.00246235	NA	0.869941	0.61028	0.83779
ENSMUSG00000022634	Yaf2	-0.203561	0.000344195	0.0217993	-0.120302	0.0378264	0.390548	-0.0858949	0.175855	0.473088
ENSMUSG00000026623	Lpgat1	-0.274151	0.00034855	0.0219098	-0.188865	0.0162135	0.318768	-0.0857018	0.219422	0.528726
ENSMUSG00000026014	Raph1	-0.455968	0.000358691	0.0221922	-0.394454	0.00255226	0.170325	-0.0641504	0.602389	0.833286
ENSMUSG00000028927	Padi2	0.635094	0.000363607	0.0223206	0.172219	0.344186	0.753299	0.469644	0.0114446	0.0949584
ENSMUSG00000121596	ENSMUSG00000121596	-0.586015	0.0003868	0.0231124	-0.468772	0.00503588	NA	-0.123203	0.417989	0.717924
ENSMUSG00000043991	Pura	-0.284584	0.000408202	0.024068	-0.0776417	0.345927	0.753344	-0.209227	0.00858283	0.0779985
ENSMUSG00000027189	Trim44	-0.181773	0.000412775	0.0242043	-0.0993874	0.0592292	0.443814	-0.0843472	0.126863	0.401119
ENSMUSG00000033854	Kcnk10	-0.400204	0.000416074	0.024307	-0.11603	0.316296	NA	-0.293883	0.0216821	0.143071
ENSMUSG00000058624	Gda	-0.465739	0.000430654	0.0248813	-0.199818	0.141037	0.564374	-0.26694	0.0280531	0.168391
ENSMUSG00000022307	Oxr1	-0.424289	0.000446572	0.0254271	-0.41026	0.000934917	0.108672	-0.0169575	0.886219	0.960898
ENSMUSG00000020598	Nrcam	-0.288961	0.00046094	0.0261159	-0.141781	0.0938288	0.50757	-0.149645	0.0807445	0.314349
ENSMUSG00000063458	Lrmda	2.33976	0.000473996	0.0263664	0.507306	0.397517	NA	1.86601	0.00660034	0.0649001
ENSMUSG00000028246	Faxc	-0.293717	0.000477901	0.0263664	-0.153032	0.074576	0.474338	-0.141773	0.0676475	0.284732
ENSMUSG00000042743	Sgtb	-0.316745	0.000488592	0.0266605	-0.123758	0.183563	0.609319	-0.194889	0.0273762	0.166011
ENSMUSG00000022125	Cln5	0.452586	0.000504669	0.0272538	0.101754	0.435514	0.801514	0.352588	0.0144486	0.111044
ENSMUSG00000021587	Pcsk1	-0.833113	0.000532991	0.0282971	-0.616621	0.0124718	0.306888	-0.219472	0.3206	0.637792
ENSMUSG00000007207	Stx1a	-0.555013	0.000537547	0.0283475	-0.1412	0.390912	0.779425	-0.417355	0.00515062	0.0551752
ENSMUSG00000025266	Gnl3l	-0.272209	0.000548678	0.028457	-0.201798	0.0124246	0.306888	-0.0719225	0.332816	0.649429
ENSMUSG00000020644	Id2	-0.371804	0.000557862	0.0286497	-0.151967	0.168578	0.598275	-0.220444	0.0243228	0.15467
ENSMUSG00000041607	Mbp	0.692166	0.000561812	0.0287585	0.479983	0.0197796	0.334279	0.214012	0.250063	0.566045
ENSMUSG00000062070	Pgk1	-0.158692	0.000571616	0.0287915	-0.131	0.00544627	0.214597	-0.0301579	0.594534	0.828565
ENSMUSG00000007570	Fance	0.335651	0.000581064	0.0291739	0.404417	3.69e-05	0.0244363	-0.0631671	0.570697	0.81487
ENSMUSG00000031385	Plxnb3	0.644629	0.00059453	0.0293314	0.222321	0.245497	0.664037	0.425134	0.0193415	0.13351
ENSMUSG00000026269	Rnpepl1	0.277808	0.000593377	0.0293314	0.0966597	0.231822	0.649633	0.18637	0.029831	0.175291
ENSMUSG00000038312	Edem2	0.454601	0.000622473	0.0303794	0.162144	0.228805	0.646833	0.296904	0.0244834	0.155272
ENSMUSG00000055538	Zcchc24	0.353034	0.000634726	0.0305037	0.0741764	0.482122	0.828416	0.282893	0.00548639	0.0575999
ENSMUSG00000063049	Ing2	-0.350301	0.000633701	0.0305037	-0.120819	0.248341	0.667627	-0.232933	0.0198508	0.1352
ENSMUSG00000041020	Map7d2	-0.211399	0.000692091	0.0328652	-0.102061	0.109315	0.528181	-0.111209	0.0785126	0.310096
ENSMUSG00000024816	Frmd8	0.632911	0.000738232	0.0345394	0.110582	0.562711	0.866046	0.527215	0.00522352	0.0555759
ENSMUSG00000027301	Oxt	6.8857	0.000741176	0.0345626	5.5389	0.0062861	NA	2.01916	0.356898	0.668498
ENSMUSG00000033436	Armcx2	-0.213763	0.000744483	0.0345852	-0.107429	0.0965971	0.509216	-0.108993	0.132553	0.412382
ENSMUSG00000075289	Carns1	0.613239	0.000773829	0.0354534	0.695755	0.000166642	NA	-0.0770284	0.69097	0.877633
ENSMUSG00000025453	Nnt	-5.27932	0.000781638	0.0356042	-5.57906	0.000429071	NA	0.324871	0.771046	0.914594
ENSMUSG00000056724	Nbeal2	0.457393	0.000797364	0.0359042	0.282257	0.0388687	NA	0.180362	0.172597	0.468238
ENSMUSG00000046550	Spin2c	-0.633679	0.0008054	0.0360595	-0.418638	0.0298632	NA	-0.225083	0.263116	0.580591
ENSMUSG00000052534	Pbx1	-0.301904	0.000810249	0.0361735	-0.221115	0.0166605	0.321466	-0.08251	0.329626	0.646073
ENSMUSG00000087141	Plcxd2	-0.701079	0.000841309	0.0366699	-0.504094	0.0192788	0.33307	-0.200332	0.305695	0.623091
ENSMUSG00000027104	Atf2	-0.215069	0.00084237	0.0366699	-0.161207	0.0142664	0.307746	-0.0558637	0.400504	0.704056
ENSMUSG00000028926	Cdk14	-0.258784	0.00084214	0.0366699	-0.236904	0.00286003	0.173826	-0.0261331	0.786764	0.921163
ENSMUSG00000067879	Vxn	-0.447509	0.00083387	0.0366699	-0.440795	0.00133526	0.126776	-0.0114128	0.93424	0.978323
ENSMUSG00000056158	Car10	-0.538627	0.000847657	0.0367124	-0.184135	0.266271	0.683051	-0.352065	0.0175717	0.125883
ENSMUSG00000056211	R3hdm1	-0.326663	0.000881235	0.0375301	-0.125724	0.211816	0.633346	-0.201089	0.0242959	0.154559
ENSMUSG00000028488	Sh3gl2	-0.323708	0.000921303	0.0388531	-0.177015	0.0773078	0.480509	-0.150094	0.144478	0.430467
ENSMUSG00000005672	Kit	-0.553566	0.00096811	0.0403551	-0.294308	0.0873009	0.498467	-0.264052	0.100661	0.353615
ENSMUSG00000029651	Mtus2	-0.341484	0.000985941	0.040696	-0.106766	0.314087	0.730176	-0.236879	0.0146958	0.11242
ENSMUSG00000032393	Dpp8	-0.204862	0.000984317	0.040696	-0.130555	0.0401599	0.398556	-0.0759799	0.241638	0.557958
ENSMUSG00000041309	Nkx6-2	0.757434	0.000995985	0.0408724	0.448683	0.0545971	NA	0.309935	0.14303	0.428381
ENSMUSG00000040724	Kcna2	-0.289111	0.000998727	0.0408724	-0.215104	0.0169061	0.321466	-0.0760145	0.3679	0.678259
ENSMUSG00000022296	Baalc	-0.289301	0.00101689	0.0414697	-0.191734	0.0335981	0.376799	-0.0998926	0.241067	0.557011
ENSMUSG00000021700	Rab3c	-0.439081	0.0010186	0.0414697	-0.480928	0.000453411	0.0834301	0.0371943	0.784159	0.920171
ENSMUSG00000048537	Phldb1	0.502715	0.00104254	0.0418884	0.227235	0.147945	0.575866	0.277647	0.0574732	0.259054
ENSMUSG00000004846	Plod3	0.343336	0.00104432	0.0418884	0.174845	0.0992926	0.514253	0.171014	0.152541	0.442159
ENSMUSG00000058013	Septin11	-0.327443	0.0010371	0.0418884	-0.201155	0.0490564	0.418126	-0.126657	0.162136	0.454322
ENSMUSG00000029064	Gnb1	-0.137394	0.0010518	0.0420586	-0.0596304	0.164885	0.596272	-0.079556	0.0913721	0.335241
ENSMUSG00000031292	Cdkl5	-0.353961	0.00107709	0.0427469	-0.163291	0.141388	0.564374	-0.193232	0.0807916	0.314349
ENSMUSG00000037625	Cldn11	0.646635	0.00110849	0.0428007	0.135959	0.503612	0.838085	0.512191	0.00518218	0.0554224
ENSMUSG00000020580	Rock2	-0.239915	0.0011074	0.0428007	-0.165564	0.0280119	0.364343	-0.0765997	0.336196	0.652795
ENSMUSG00000028132	Tlcd4	-0.297647	0.00112238	0.042811	-0.142331	0.127768	0.547769	-0.154494	0.0631578	0.273137
ENSMUSG00000015806	Qdpr	0.423149	0.00112003	0.042811	0.209534	0.11514	0.534742	0.214397	0.0720999	0.296501
ENSMUSG00000041014	Nrg3	-0.332956	0.00112145	0.042811	-0.153364	0.142128	0.565078	-0.182802	0.0816142	0.316059
ENSMUSG00000041817	Fam169a	-0.298334	0.00111682	0.042811	-0.176352	0.0595122	0.444484	-0.12621	0.170481	0.465255
ENSMUSG00000036580	Spg20	0.369407	0.00114273	0.0432723	0.155435	0.179031	0.60629	0.215747	0.0422987	0.218252
ENSMUSG00000058355	Abce1	-0.198851	0.00114805	0.0433694	-0.16339	0.00873682	0.263636	-0.038309	0.546478	0.801877
ENSMUSG00000029470	P2rx4	0.469564	0.00115448	0.0435076	-0.0247526	0.864197	NA	0.501615	0.00464898	0.0513196
ENSMUSG00000029636	Wasf3	-0.118069	0.00116648	0.043542	-0.0537587	0.145054	0.570823	-0.0653179	0.068752	0.287616
ENSMUSG00000051985	Igfn1	-2.38483	0.00118582	0.0439507	-1.67484	0.0271894	NA	-0.722914	0.272211	0.590532
ENSMUSG00000045314	Sowahb	-1.31358	0.00120331	0.0442857	-0.537794	0.197799	NA	-0.778913	0.0347224	0.192811
ENSMUSG00000092083	Kcnb2	-0.400154	0.00120821	0.0442885	-0.091724	0.468656	0.822115	-0.31013	0.00659307	0.0649001
ENSMUSG00000028524	Sgip1	-0.247166	0.00120902	0.0442885	-0.111906	0.152468	0.57995	-0.137367	0.081534	0.316059
ENSMUSG00000036098	Myrf	0.553859	0.00121845	0.0445302	0.292403	0.0954297	0.508429	0.264155	0.105341	0.361225
ENSMUSG00000006273	Atp6v1b2	-0.174829	0.00124054	0.0446209	-0.0749298	0.177012	0.604338	-0.102176	0.085982	0.324874
ENSMUSG00000038172	Ttc39b	-0.324362	0.00127669	0.0457019	-0.358365	0.000492942	0.0848865	0.031286	0.74865	0.904301
ENSMUSG00000028633	Ctps	-0.269005	0.00132028	0.0464052	-0.100803	0.237942	0.654815	-0.170254	0.0316028	0.181422
ENSMUSG00000037236	Matr3	-0.224503	0.00132291	0.0464052	-0.12178	0.0891583	0.501429	-0.104757	0.14428	0.430177
ENSMUSG00000071176	Arhgef10	0.530162	0.00130958	0.0464052	0.316814	0.0604143	0.445352	0.216948	0.166703	0.459608
ENSMUSG00000005045	Chd5	-0.312216	0.00133586	0.0465299	-0.09968	0.31799	0.732379	-0.214237	0.0179906	0.127594
ENSMUSG00000021619	Atg10	-0.37539	0.00133831	0.0465299	-0.2251	0.0571951	NA	-0.157464	0.198363	0.504562
ENSMUSG00000039263	Npepl1	0.402746	0.00135432	0.0466736	0.255158	0.0436952	0.406321	0.15082	0.220017	0.529517
ENSMUSG00000029469	Ift81	-0.279272	0.00136183	0.0468295	-0.130355	0.141771	0.564671	-0.153112	0.0778839	0.308844
ENSMUSG00000093930	Hmgcs1	-0.4872	0.00137358	0.0470278	-0.0970975	0.534315	0.853089	-0.394794	0.00925158	0.0821437
ENSMUSG00000029757	Dync1i1	-0.157399	0.00140789	0.048062	-0.0275815	0.583228	0.873157	-0.132322	0.0119141	0.0976243
ENSMUSG00000031065	Cdk16	-0.199769	0.00142879	0.0483085	-0.0284994	0.656859	0.90335	-0.173002	0.0053468	0.056595
ENSMUSG00000033039	Micall1	0.402206	0.00142943	0.0483085	0.223378	0.0821804	0.491266	0.180586	0.125526	0.399115
ENSMUSG00000026434	Nucks1	-0.195145	0.00144416	0.0484934	-0.211421	0.00072487	0.0987474	0.0126589	0.866532	0.954072
ENSMUSG00000026641	Usf1	0.264475	0.00146505	0.0488817	0.263887	0.00179499	0.150228	0.00198771	0.979646	0.993193
ENSMUSG00000040612	Ildr2	-0.254606	0.00147577	0.0489288	-0.199591	0.0149175	0.308948	-0.0559473	0.444968	0.738103
ENSMUSG00000024758	Rtn3	-0.155954	0.0014829	0.0490605	-0.129768	0.00991772	0.275283	-0.0276669	0.599268	0.831403
ENSMUSG00000034584	Exph5	-1.0567	0.00151038	0.0497601	-0.310311	0.365702	NA	-0.750446	0.0131788	0.104376
ENSMUSG00000042116	Vwa1	0.419999	0.00150993	0.0497601	0.0818741	0.54267	0.859103	0.343515	0.0188558	0.13143

## Sheet: Comparison 2
Comparison 2		PS19 Vs WT			PS19 vs PS19;CK2α’(+/-)			PS19;CK2α’(+/-) vs WT
Ensembl	GeneSymbol	LogFC	p-value	q-value	LogFC	p-value	q-value	LogFC	p-value	q-value
ENSMUSG00000046707	Csnk2a2	-0.078087	0.246376	0.682496	0.854766	5.62e-34	5.23e-30	-0.933179	4.53e-50	3.73e-46
ENSMUSG00000060586	H2-Eb1	1.17481	0.0118243	0.158413	-1.95509	2.47e-05	NA	3.17709	2.4e-11	4.94e-08
ENSMUSG00000023186	Vwa5a	0.355491	0.00384463	0.0848572	-0.404371	0.00108426	0.114872	0.763138	4.07e-11	7.44e-08
ENSMUSG00000073421	H2-Ab1	1.52237	0.00526056	0.100084	-2.25487	2.36e-05	NA	3.79536	8.64e-11	1.19e-07
ENSMUSG00000056429	Tgoln1	0.190327	0.0264642	0.247109	-0.292773	0.000837258	0.103809	0.482845	5.68e-10	5.51e-07
ENSMUSG00000026656	Fcgr2b	1.40773	0.00154724	0.0505402	-1.1496	0.0105359	NA	2.57323	8.59e-10	7.07e-07
ENSMUSG00000015340	Cybb	2.60836	0.00163427	0.0525204	-1.86042	0.0237254	NA	4.53512	5.64e-09	2.9e-06
ENSMUSG00000026031	Cflar	0.369617	0.00388414	0.0855912	-0.309671	0.0162131	0.318768	0.680559	5.51e-09	2.9e-06
ENSMUSG00000025745	Hadha	0.170426	0.0144925	0.177652	-0.199792	0.00459111	0.199942	0.371114	5.39e-09	2.9e-06
ENSMUSG00000037579	Kcnh3	-0.281963	0.0151868	0.182184	0.329221	0.00577585	0.220121	-0.611344	7.73e-09	3.74e-06
ENSMUSG00000034730	Adgrb1	-0.03368	0.751163	0.936421	0.525244	1.46e-06	0.00304985	-0.558086	1.18e-08	5.08e-06
ENSMUSG00000060802	B2m	1.0415	0.00396821	0.0867323	-0.848785	0.0220259	0.343652	1.89923	2.58e-08	8.68e-06
ENSMUSG00000008398	Elk3	0.386356	0.0189688	0.205441	-0.447379	0.00598338	NA	0.837298	3.78e-08	1.17e-05
ENSMUSG00000024909	Efemp2	0.66297	0.00203796	0.0602107	-0.451334	0.0363057	NA	1.12046	4.16e-08	1.2e-05
ENSMUSG00000034739	Mfrp	3.97138	0.0248336	0.238254	-5.12266	0.0029023	NA	9.12896	4.06e-08	1.2e-05
ENSMUSG00000004187	Kifc2	-0.180131	0.036655	0.292217	0.243939	0.00582955	0.221261	-0.423812	6.69e-08	1.82e-05
ENSMUSG00000041577	Prelp	0.288313	0.124937	0.520356	-0.633301	0.000934585	0.108672	0.918481	1.08e-07	2.73e-05
ENSMUSG00000036564	Ndrg4	-0.128288	0.0158453	0.186359	0.132576	0.0151136	0.310826	-0.260367	1.22e-07	2.92e-05
ENSMUSG00000036594	H2-Aa	1.85662	0.0160854	0.187384	-2.09383	0.007265	NA	4.03907	1.27e-07	2.97e-05
ENSMUSG00000041891	Lman1	0.12554	0.0426931	0.318275	-0.18991	0.00213047	0.163059	0.317502	1.28e-07	2.97e-05
ENSMUSG00000038235	F11r	0.374574	0.0961871	0.468852	-0.702372	0.00197357	NA	1.07711	1.34e-07	3.06e-05
ENSMUSG00000054013	Tmem179	-0.0167763	0.85729	0.96741	0.431344	6.62e-06	0.00684253	-0.448468	1.36e-07	3.06e-05
ENSMUSG00000066026	Dhrs3	0.429855	0.0267322	0.248137	-0.500696	0.0107353	0.28441	0.933524	1.44e-07	3.09e-05
ENSMUSG00000069516	Lyz2	1.9924	0.00357639	0.0821681	-1.48321	0.0340697	0.376799	3.49633	1.76e-07	3.63e-05
ENSMUSG00000029484	Anxa3	0.852984	0.00533911	0.101211	-0.658804	0.0338786	NA	1.52392	2.02e-07	3.96e-05
ENSMUSG00000026860	Sh3glb2	-0.0613752	0.440896	0.817542	0.314452	0.00011811	0.0410519	-0.375747	2.06e-07	3.99e-05
ENSMUSG00000032440	Tgfbr2	0.683907	0.00262532	0.0699269	-0.507163	0.0284931	0.366264	1.20138	2.17e-07	4.06e-05
ENSMUSG00000008976	Gabpa	0.210559	0.0160176	0.186872	-0.206185	0.0182636	0.324109	0.418582	2.25e-07	4.17e-05
ENSMUSG00000016534	Lamp2	0.342181	0.0173209	0.195161	-0.356405	0.0154076	0.312829	0.701826	2.77e-07	4.88e-05
ENSMUSG00000007613	Tgfbr1	0.680373	0.00522517	0.0999624	-0.52604	0.0347163	0.378142	1.21403	2.94e-07	5.1e-05
ENSMUSG00000024610	Cd74	2.91261	0.00314094	0.0767648	-1.74436	0.0840585	0.494137	4.73242	3.28e-07	5.58e-05
ENSMUSG00000022453	Naga	0.322531	0.00382866	0.0847647	-0.195378	0.0792794	0.484549	0.519685	3.69e-07	5.9e-05
ENSMUSG00000006611	Hfe	0.687242	0.0238146	0.232307	-0.721991	0.0180958	NA	1.41148	3.7e-07	5.9e-05
ENSMUSG00000039007	Cpq	0.441497	0.0204228	0.214106	-0.476954	0.0129849	0.306888	0.925344	3.96e-07	6.09e-05
ENSMUSG00000034947	Tmem106a	1.21841	0.00713249	0.119496	-0.969446	0.0261022	NA	2.20459	4.2e-07	6.4e-05
ENSMUSG00000058056	Palld	0.300102	0.0453271	0.330257	-0.389055	0.00824721	NA	0.69264	4.89e-07	6.95e-05
ENSMUSG00000024429	Gnl1	-0.0823792	0.135527	0.539291	0.167912	0.00294569	0.174471	-0.250512	5.58e-07	7.59e-05
ENSMUSG00000032359	Ctsh	0.840864	0.00824294	0.130222	-0.711474	0.0280535	0.364343	1.5586	5.88e-07	7.78e-05
ENSMUSG00000069806	Cacng7	-0.187826	0.0129646	0.166862	0.154309	0.0464933	0.408203	-0.342303	5.99e-07	7.78e-05
ENSMUSG00000020432	Tcn2	0.589448	0.0155116	0.1845	-0.526137	0.0339829	0.376799	1.11797	6.11e-07	7.78e-05
ENSMUSG00000066000	Zfp979	1.26849	0.0533893	0.355142	-1.78677	0.00289389	NA	3.0108	6.24e-07	7.78e-05
ENSMUSG00000029054	Gabrd	-0.405142	0.0618102	0.380473	0.664671	0.00291877	0.174106	-1.06655	6.08e-07	7.78e-05
ENSMUSG00000002006	Pdzd4	-0.123273	0.0691458	0.4038	0.183457	0.00823912	0.258836	-0.30654	6.28e-07	7.78e-05
ENSMUSG00000033256	Shf	-0.0754494	0.413777	0.800505	0.34642	0.00025195	0.0605097	-0.421734	5.77e-07	7.78e-05
ENSMUSG00000021702	Thbs4	0.76125	0.0034078	0.0791615	-0.429221	0.1046	0.522285	1.1937	6.72e-07	8.03e-05
ENSMUSG00000029816	Gpnmb	1.90178	0.0039865	0.0870109	-1.07785	0.109372	NA	2.9896	6.65e-07	8.03e-05
ENSMUSG00000115338	Pnp	0.442456	0.0165702	0.190769	-0.383621	0.0352358	NA	0.827819	6.97e-07	8.14e-05
ENSMUSG00000025739	Gng13	-0.399197	0.0829233	0.438472	0.646559	0.00707975	NA	-1.04613	7.21e-07	8.36e-05
ENSMUSG00000030678	Maz	-0.11756	0.139232	0.543071	0.239979	0.00324691	0.17509	-0.358084	8.28e-07	9.34e-05
ENSMUSG00000079547	H2-DMb1	0.890535	0.113715	0.500697	-1.61803	0.00345712	NA	2.51018	8.61e-07	9.64e-05
ENSMUSG00000020444	Guk1	-0.182512	0.0139623	0.17428	0.147981	0.0516165	0.422185	-0.330289	9.15e-07	9.98e-05
ENSMUSG00000009585	Apobec3	0.755211	0.0100489	0.146357	-0.660704	0.0219416	NA	1.43596	9.48e-07	0.000101385
ENSMUSG00000059447	Hadhb	0.171215	0.0612592	0.379678	-0.239273	0.00999881	0.275902	0.411685	9.43e-07	0.000101385
ENSMUSG00000022146	Osmr	1.35012	0.00276207	0.0712741	-0.878998	0.0560397	0.432101	2.24055	1.02e-06	0.00010834
ENSMUSG00000059555	Tor4a	0.748354	0.0033509	0.0791615	-0.383634	0.124754	NA	1.13595	1.03e-06	0.00010834
ENSMUSG00000035863	Palm	-0.0769939	0.303907	0.730594	0.279431	0.000274246	0.0622004	-0.354583	1.05e-06	0.000110091
ENSMUSG00000042190	Cmklr1	0.704533	0.007657	0.124536	-0.522483	0.0470148	NA	1.23704	1.11e-06	0.000114324
ENSMUSG00000007891	Ctsd	0.912513	0.00657619	0.114319	-0.633607	0.0658922	0.458975	1.54954	1.18e-06	0.000119367
ENSMUSG00000046822	Slc39a3	-0.0646881	0.293384	0.722833	0.205595	0.00108737	0.114872	-0.270442	1.17e-06	0.000119367
ENSMUSG00000048644	Ctxn1	-0.155032	0.121892	0.514273	0.288899	0.0049745	0.206038	-0.444229	1.19e-06	0.000119834
ENSMUSG00000023224	Serping1	0.76784	0.046579	0.333726	-0.956611	0.0147258	NA	1.76014	1.4e-06	0.000137255
ENSMUSG00000061808	Ttr	2.65292	0.110577	0.497843	-4.83108	0.0046188	0.199942	7.48439	1.43e-06	0.000138069
ENSMUSG00000016496	Cd274	1.2089	0.00249424	0.0676978	-0.594215	0.131461	NA	1.81402	1.45e-06	0.000138647
ENSMUSG00000052688	Rab7b	1.27413	0.0231461	0.229056	-1.27064	0.0214787	NA	2.57204	1.44e-06	0.000138647
ENSMUSG00000021876	Rnase4	0.397828	0.0171894	0.194339	-0.358585	0.0332212	0.376799	0.760514	1.48e-06	0.000139933
ENSMUSG00000031740	Mmp2	0.598819	0.0845002	0.442051	-0.911171	0.00752773	NA	1.51108	1.48e-06	0.000139933
ENSMUSG00000026547	Tagln2	0.674915	0.0045231	0.092724	-0.423564	0.076887	NA	1.10635	1.5e-06	0.000140812
ENSMUSG00000024885	Aldh3b1	0.556613	0.00812089	0.129636	-0.352407	0.0873688	NA	0.909996	1.57e-06	0.000145237
ENSMUSG00000041697	Cox6a1	-0.120428	0.122916	0.515514	0.221453	0.00568558	0.220121	-0.341546	1.57e-06	0.000145237
ENSMUSG00000032402	Smad3	-0.279698	0.00448395	0.0923529	0.151029	0.134688	0.556218	-0.431404	1.67e-06	0.000154091
ENSMUSG00000025092	Hspa12a	-0.211532	0.00489456	0.0963885	0.126877	0.0999218	0.514253	-0.339315	1.8e-06	0.000164688
ENSMUSG00000020143	Dock2	1.12807	0.00341206	0.0791615	-0.685433	0.0793689	NA	1.82621	1.86e-06	0.000165931
ENSMUSG00000025510	Cd151	0.366078	0.0303355	0.266576	-0.385255	0.024685	0.344663	0.755728	1.86e-06	0.000165931
ENSMUSG00000036644	Tbc1d9b	-0.0568888	0.439664	0.816897	0.289876	0.00012361	0.0410519	-0.345006	1.85e-06	0.000165931
ENSMUSG00000061132	Blnk	0.664492	0.0042766	0.0903317	-0.349557	0.130428	NA	1.01817	1.94e-06	0.000171772
ENSMUSG00000030894	Tpp1	0.156117	0.0976739	0.472092	-0.255363	0.00778744	0.252848	0.41248	1.96e-06	0.000172774
ENSMUSG00000022148	Fyb	1.29398	0.00173427	0.0543994	-0.603258	0.145521	NA	1.91375	2.02e-06	0.000175596
ENSMUSG00000032806	Slc10a3	0.368224	0.13192	0.532387	-0.678578	0.00375956	NA	1.04116	2.04e-06	0.000175958
ENSMUSG00000038521	C1s1	1.29566	0.00232527	0.0644474	-0.590224	0.123485	NA	1.89868	2.21e-06	0.00018991
ENSMUSG00000030302	Atp2b2	-0.303527	0.00499391	0.0972195	0.166695	0.133069	0.553897	-0.470864	2.24e-06	0.000190856
ENSMUSG00000046805	Mpeg1	1.33145	0.00411913	0.0883113	-0.746655	0.11648	0.535925	2.08705	2.37e-06	0.000199863
ENSMUSG00000003418	St8sia6	1.10124	0.00215997	0.0618288	-0.484353	0.1818	NA	1.59331	2.42e-06	0.000201141
ENSMUSG00000064246	Chil1	0.95179	0.00451061	0.092724	-0.600578	0.078373	0.481539	1.56806	2.44e-06	0.000201778
ENSMUSG00000032434	Cmtm6	0.260749	0.0365081	0.292217	-0.272373	0.0311696	0.376704	0.534035	2.7e-06	0.000217643
ENSMUSG00000030579	Tyrobp	1.54089	0.0016582	0.0529646	-0.681121	0.173148	0.602313	2.22944	2.75e-06	0.000220111
ENSMUSG00000044216	Kcnj4	-0.379135	0.00841861	0.13164	0.238055	0.107225	0.525162	-0.617987	2.94e-06	0.000233831
ENSMUSG00000031995	St14	1.98606	0.0030913	0.0759059	-1.02546	0.117301	NA	3.03939	3.03e-06	0.000239
ENSMUSG00000074825	Itpripl1	1.09074	0.00525607	0.100084	-0.588195	0.128934	NA	1.68361	3.11e-06	0.000242424
ENSMUSG00000014599	Csf1	0.58901	0.00374609	0.0840641	-0.29373	0.156138	0.584318	0.887046	3.15e-06	0.000245103
ENSMUSG00000027479	Mapre1	0.128579	0.0288556	0.260463	-0.138556	0.0199852	0.334279	0.269034	3.26e-06	0.000251215
ENSMUSG00000037321	Tap1	0.969871	0.00190788	0.0581052	-0.472711	0.130945	NA	1.45013	3.41e-06	0.000259716
ENSMUSG00000067586	S1pr3	1.0843	0.00167575	0.0533085	-0.699974	0.0461017	0.408203	1.79439	3.5e-06	0.000262389
ENSMUSG00000028273	Pdlim5	0.237366	0.00647505	0.11344	-0.144837	0.099559	0.514253	0.384394	3.48e-06	0.000262389
ENSMUSG00000028838	Extl1	-0.116267	0.174342	0.591747	0.246152	0.00501716	0.206038	-0.362971	3.54e-06	0.000262479
ENSMUSG00000023367	Tmem176a	0.653193	0.00865582	0.13349	-0.441119	0.0815698	0.490966	1.09768	3.65e-06	0.00026743
ENSMUSG00000049723	Mmp12	3.13222	0.00211691	0.0612656	-1.54785	0.0822123	NA	4.77437	3.9e-06	0.000283179
ENSMUSG00000024679	Ms4a6d	1.32761	0.00642882	0.113297	-0.904708	0.0570061	NA	2.2704	4.1e-06	0.000291196
ENSMUSG00000071203	Naip5	1.30305	0.00202028	0.0600613	-0.567014	0.161182	NA	1.89303	4.15e-06	0.000293599
ENSMUSG00000041193	Pla2g5	0.83817	0.203585	0.631655	-1.95187	0.00270814	NA	2.78717	4.25e-06	0.000297762
ENSMUSG00000003863	Ppfia3	-0.102711	0.150272	0.560534	0.196995	0.00711593	0.245129	-0.300253	4.35e-06	0.000302517
ENSMUSG00000025935	Tram1	0.227102	0.0143613	0.177289	-0.163606	0.0792497	0.484549	0.389505	4.42e-06	0.000304722
ENSMUSG00000078920	Ifi47	1.3031	0.00608686	0.109948	-0.791988	0.0763598	NA	2.13714	4.82e-06	0.000324077
ENSMUSG00000027750	Postn	0.947115	0.0692175	0.403918	-1.2871	0.0133446	NA	2.246	4.94e-06	0.00032913
ENSMUSG00000000532	Acvr1b	-0.0924471	0.117679	0.507917	0.150493	0.0128003	0.306888	-0.242792	5.54e-06	0.00036205
ENSMUSG00000061838	Suclg2	0.373588	0.00409426	0.0881795	-0.206412	0.11494	0.534742	0.584136	5.76e-06	0.000375261
ENSMUSG00000043279	Trim56	0.437487	0.00795668	0.128245	-0.282826	0.0870838	0.498467	0.728018	5.96e-06	0.00038595
ENSMUSG00000016256	Ctsz	1.16989	0.00175473	0.0545754	-0.461575	0.228111	0.646833	1.63683	6.55e-06	0.000416432
ENSMUSG00000029861	Fam131b	-0.251875	0.00172161	0.0541101	0.0819748	0.319733	0.733761	-0.33481	6.95e-06	0.000432735
ENSMUSG00000001123	Lgals9	0.811327	0.00410177	0.0881795	-0.403343	0.157682	NA	1.224	7e-06	0.000432735
ENSMUSG00000033577	Myo6	0.229138	0.00757162	0.124026	-0.131503	0.133427	0.554644	0.361976	7.02e-06	0.000432735
ENSMUSG00000067212	H2-T23	0.779289	0.0118563	0.158707	-0.57356	0.067995	NA	1.3735	6.99e-06	0.000432735
ENSMUSG00000070780	Rbm47	1.85636	0.0179833	0.199723	-1.40589	0.0688229	NA	3.27985	7.11e-06	0.0004356
ENSMUSG00000004655	Aqp1	2.19276	0.123501	0.517062	-3.70548	0.00942746	NA	5.9046	7.09e-06	0.0004356
ENSMUSG00000022463	Srebf2	-0.133046	0.0936159	0.464239	0.203218	0.0125397	0.306888	-0.337677	7.21e-06	0.000439862
ENSMUSG00000026608	Kctd3	-0.0268959	0.690908	0.919175	0.249686	0.00030795	0.0625112	-0.277221	7.3e-06	0.00044341
ENSMUSG00000022272	Myo10	0.298991	0.0107866	0.151933	-0.184394	0.12169	0.541624	0.485187	7.49e-06	0.000452053
ENSMUSG00000026466	Tor1aip1	0.251029	0.0113065	0.155414	-0.185015	0.0643832	0.454396	0.439146	7.9e-06	0.000466929
ENSMUSG00000039838	Slc45a1	-0.0629854	0.338243	0.75544	0.204232	0.0023448	0.165933	-0.26758	7.91e-06	0.000466929
ENSMUSG00000024308	Tapbp	0.293804	0.0519988	0.350435	-0.37384	0.0148326	0.308948	0.672109	8.13e-06	0.000476344
ENSMUSG00000042613	Pbxip1	0.475158	0.00512492	0.0988455	-0.246068	0.156543	0.585085	0.724463	8.22e-06	0.000480083
ENSMUSG00000006281	Tep1	0.567747	0.00464776	0.0946107	-0.271045	0.173164	NA	0.844073	8.32e-06	0.000482412
ENSMUSG00000036334	Igsf10	0.565567	0.0507351	0.346637	-0.676183	0.0184892	NA	1.24891	8.88e-06	0.000507737
ENSMUSG00000052584	Serp2	-0.196786	0.0386205	0.300616	0.18663	0.0556619	0.432101	-0.383391	9.17e-06	0.000522793
ENSMUSG00000040296	Rigi	0.859904	0.00204428	0.0602107	-0.313753	0.262867	NA	1.18284	9.38e-06	0.000529874
ENSMUSG00000017314	Mpp2	-0.240457	0.00422716	0.0896488	0.108914	0.206482	0.630359	-0.350784	9.43e-06	0.000529874
ENSMUSG00000020120	Plek	1.07405	0.00429839	0.0906701	-0.501838	0.191656	0.614768	1.58192	9.46e-06	0.000529874
ENSMUSG00000059089	Fcgr4	3.3645	0.00462182	0.0943271	-1.58407	0.138358	NA	5.05598	9.42e-06	0.000529874
ENSMUSG00000028459	Cd72	1.70982	0.0176395	0.197439	-1.39793	0.0453976	NA	3.16785	9.52e-06	0.000531654
ENSMUSG00000039680	Mrps6	0.234191	0.0902208	0.455744	-0.329095	0.0175037	0.321466	0.566213	9.6e-06	0.00053393
ENSMUSG00000028467	Gba2	-0.113161	0.16273	0.57792	0.212274	0.0105763	0.280998	-0.3254	9.69e-06	0.000537103
ENSMUSG00000063354	Slc39a4	1.69134	0.0247444	0.237975	-1.45904	0.0479461	NA	3.11283	9.85e-06	0.000544332
ENSMUSG00000018042	Cyb5r3	0.159077	0.08441	0.44202	-0.212609	0.023363	0.344515	0.372641	9.88e-06	0.000544472
ENSMUSG00000024277	Mapre2	-0.121785	0.00419191	0.0892964	0.0506966	0.243864	0.662986	-0.171984	1e-05	0.000549195
ENSMUSG00000031659	Adcy7	0.92854	0.00485857	0.0962376	-0.516249	0.120111	NA	1.46951	1.06e-05	0.000579406
ENSMUSG00000038855	Itpkb	0.296726	0.0130142	0.167364	-0.19829	0.103495	0.521344	0.497133	1.07e-05	0.000580007
ENSMUSG00000084845	Tmem240	-0.203056	0.023404	0.230305	0.153928	0.0931388	0.505603	-0.3579	1.08e-05	0.000582041
ENSMUSG00000052310	Slc39a1	0.301889	0.0170021	0.192915	-0.215392	0.093595	0.5066	0.520229	1.1e-05	0.000592527
ENSMUSG00000032231	Anxa2	0.321393	0.202326	0.630214	-0.689363	0.0069468	NA	1.01614	1.1e-05	0.000592527
ENSMUSG00000078945	Naip2	1.44556	0.00198342	0.0595974	-0.613084	0.186802	NA	2.0771	1.13e-05	0.000599826
ENSMUSG00000020101	Vsir	0.518305	0.00440225	0.0913889	-0.241586	0.192719	0.616691	0.763362	1.18e-05	0.00062292
ENSMUSG00000029119	Man2b2	0.381318	0.0117056	0.157515	-0.253214	0.100041	0.514253	0.63784	1.18e-05	0.000623173
ENSMUSG00000017639	Rab11fip4	-0.16214	0.00318883	0.0771814	0.0614717	0.275216	0.691124	-0.224412	1.21e-05	0.000635456
ENSMUSG00000083596	Rpl21-ps15	0.383365	0.0561236	0.364329	-0.441211	0.028515	NA	0.819477	1.24e-05	0.000644301
ENSMUSG00000047766	Lrrc49	-0.195713	0.0227915	0.227553	0.145443	0.0986153	0.513554	-0.340805	1.25e-05	0.000645346
ENSMUSG00000024725	Ostf1	0.278407	0.0250882	0.24011	-0.265782	0.0325001	0.376704	0.540006	1.25e-05	0.000645889
ENSMUSG00000025283	Sat1	0.303592	0.0387283	0.301145	-0.299058	0.0450349	0.407826	0.605871	1.32e-05	0.000674703
ENSMUSG00000032122	Slc37a2	0.785437	0.0497231	0.34317	-0.809659	0.0447731	NA	1.59936	1.31e-05	0.000674703
ENSMUSG00000029771	Irf5	0.909475	0.00314892	0.0767796	-0.364345	0.233633	NA	1.28701	1.33e-05	0.00067847
ENSMUSG00000027134	Lpcat4	-0.205831	0.0230393	0.228914	0.158046	0.0886334	0.500426	-0.363063	1.34e-05	0.00067847
ENSMUSG00000056529	Ptafr	0.885825	0.0390592	0.301185	-0.818508	0.0519581	NA	1.708	1.34e-05	0.00067847
ENSMUSG00000035969	Rusc2	-0.0934483	0.0983257	0.474129	0.128768	0.0259563	0.354952	-0.222091	1.38e-05	0.000693813
ENSMUSG00000028127	Abcd3	0.0724038	0.252774	0.688987	-0.177853	0.00554976	0.216486	0.251049	1.39e-05	0.000693813
ENSMUSG00000024998	Plce1	0.60057	0.00655581	0.114218	-0.336241	0.134442	0.556218	0.944667	1.41e-05	0.000704452
ENSMUSG00000030102	Itpr1	-0.32781	0.00820372	0.129961	0.164866	0.195227	0.620444	-0.492916	1.43e-05	0.000709417
ENSMUSG00000043664	Tmem221	3.17566	0.00383155	0.0847647	-1.31667	0.0909413	NA	4.4812	1.46e-05	0.000720013
ENSMUSG00000024691	Fam111a	0.772685	0.00934296	0.139435	-0.575555	0.0446547	NA	1.36057	1.46e-05	0.000721351
ENSMUSG00000058966	Tlcd3b	-0.113478	0.168097	0.584341	0.209875	0.0127761	0.306888	-0.323558	1.52e-05	0.000747148
ENSMUSG00000046794	Ppp1r3b	0.613344	0.145902	0.552765	-1.0517	0.0111476	NA	1.67382	1.55e-05	0.000753958
ENSMUSG00000032412	Atp1b3	0.275437	0.00876831	0.134171	-0.154454	0.14991	0.57922	0.432426	1.59e-05	0.000769766
ENSMUSG00000024079	Eif2ak2	0.722691	0.0172641	0.194805	-0.522095	0.0888144	NA	1.26116	1.61e-05	0.000779269
ENSMUSG00000043943	Naalad2	0.904141	0.00251279	0.0678496	-0.290711	0.309883	NA	1.20097	1.69e-05	0.000808538
ENSMUSG00000026480	Ncf2	1.27254	0.00272883	0.0708818	-0.473416	0.269548	NA	1.75043	1.71e-05	0.000812833
ENSMUSG00000089929	Bcl2a1b	1.92088	0.00751491	0.123587	-1.07239	0.0914331	NA	3.02491	1.73e-05	0.000812833
ENSMUSG00000013707	Tnfaip8l2	1.00374	0.0108572	0.152612	-0.557653	0.152219	NA	1.57051	1.72e-05	0.000812833
ENSMUSG00000045790	Ccdc149	-0.141442	0.0159556	0.186842	0.0909026	0.128337	0.549074	-0.233395	1.71e-05	0.000812833
ENSMUSG00000020077	Srgn	0.504729	0.0651809	0.392308	-0.619766	0.0245504	NA	1.13931	1.74e-05	0.000815161
ENSMUSG00000036833	Pnpla7	0.481853	0.0102712	0.14822	-0.273779	0.151475	0.579698	0.759173	1.75e-05	0.000820583
ENSMUSG00000023249	Parp3	0.885259	0.00468882	0.0949548	-0.515431	0.100467	NA	1.40924	1.76e-05	0.000823482
ENSMUSG00000024349	Sting1	0.584535	0.0267006	0.248136	-0.444498	0.0904012	NA	1.03194	1.82e-05	0.000841942
ENSMUSG00000050138	Kcnk12	-0.515492	0.00345218	0.0795469	0.189695	0.296606	0.712702	-0.711087	1.84e-05	0.00084794
ENSMUSG00000046768	Rhoj	0.624164	0.0340814	0.281297	-0.564508	0.0551459	NA	1.20052	1.85e-05	0.000851062
ENSMUSG00000027995	Tlr2	1.82061	0.0130412	0.167573	-1.04271	0.159027	NA	2.87669	1.86e-05	0.000851476
ENSMUSG00000055541	Lair1	0.772932	0.0110652	0.154157	-0.448655	0.146089	NA	1.22981	1.9e-05	0.000867218
ENSMUSG00000067158	Col4a4	0.975452	0.100192	0.477188	-1.34228	0.0213853	NA	2.32012	1.94e-05	0.000883312
ENSMUSG00000024913	Lrp5	0.416834	0.00299041	0.0741236	-0.146184	0.299163	0.714988	0.567344	1.95e-05	0.000886073
ENSMUSG00000025232	Hexa	0.55325	0.00834633	0.131032	-0.300701	0.161124	0.591044	0.857909	2.04e-05	0.000920622
ENSMUSG00000042675	Ypel3	-0.120893	0.0886507	0.45251	0.154436	0.0336324	0.376799	-0.276097	2.04e-05	0.000920622
ENSMUSG00000027430	Dtd1	-0.136596	0.0679893	0.400019	0.170787	0.025375	0.350613	-0.30985	2.05e-05	0.000921664
ENSMUSG00000028005	Gucy1b1	-0.217126	0.0194842	0.208171	0.142592	0.134765	0.556227	-0.359909	2.1e-05	0.000941607
ENSMUSG00000024781	Lipa	0.363431	0.00901986	0.137086	-0.1964	0.163469	0.596272	0.563993	2.12e-05	0.000945276
ENSMUSG00000008540	Mgst1	0.482238	0.032635	0.276782	-0.467081	0.0390963	NA	0.953454	2.13e-05	0.000947029
ENSMUSG00000002332	Dhrs1	0.450912	0.00221625	0.062751	-0.19444	0.196311	0.621223	0.649861	2.17e-05	0.000958767
ENSMUSG00000039013	Siglecf	2.00145	0.00343419	0.07925	-1.10038	0.107972	NA	3.1379	2.21e-05	0.000975406
ENSMUSG00000070605	Zfp992	1.60897	0.0182434	0.201048	-1.10504	0.0835872	NA	2.6959	2.22e-05	0.00097693
ENSMUSG00000021583	Erap1	0.323272	0.0666518	0.395277	-0.365482	0.0395453	0.395836	0.692952	2.23e-05	0.000977527
ENSMUSG00000027315	Spint1	0.380479	0.243196	0.680041	-0.877547	0.00685717	NA	1.26052	2.26e-05	0.000990128
ENSMUSG00000063975	Slco1a5	2.83804	0.0275275	0.25261	-2.31498	0.0474594	NA	5.15145	2.28e-05	0.000994346
ENSMUSG00000025350	Rdh5	1.54682	0.0462035	0.332594	-1.45742	0.0617	NA	3.00521	2.28e-05	0.000994346
ENSMUSG00000021939	Ctsb	0.327942	0.0267976	0.24817	-0.260142	0.0868732	0.498467	0.590482	2.31e-05	0.00100342
ENSMUSG00000030339	Ltbr	0.443171	0.0363883	0.292217	-0.401624	0.0590083	NA	0.849789	2.42e-05	0.00104264
ENSMUSG00000006576	Slc4a3	-0.164051	0.0530589	0.354258	0.197591	0.0231015	0.344515	-0.35895	2.42e-05	0.00104264
ENSMUSG00000068323	Slc4a5	1.96863	0.25298	0.689129	-4.74655	0.00600482	NA	6.72597	2.42e-05	0.00104264
ENSMUSG00000056698	Elmod3	0.321715	0.00154262	0.0505048	-0.075993	0.454051	0.813864	0.399551	2.59e-05	0.00110694
ENSMUSG00000021275	Tecpr2	-0.0881709	0.135757	0.539398	0.144045	0.0170659	0.321466	-0.2333	2.59e-05	0.00110694
ENSMUSG00000046432	Bex3	-0.00264879	0.96726	0.991851	0.247293	0.000179408	0.050354	-0.249306	2.6e-05	0.00110942
ENSMUSG00000072941	Sod3	0.287896	0.111952	0.498976	-0.40117	0.0281127	0.364602	0.690196	2.74e-05	0.00116461
ENSMUSG00000032554	Trf	0.475927	0.0727753	0.412496	-0.401633	0.140053	0.564229	0.878189	2.74e-05	0.00116507
ENSMUSG00000041556	Fbxo2	-0.143722	0.172599	0.590407	0.308548	0.00434381	0.19903	-0.449153	2.83e-05	0.00119672
ENSMUSG00000027007	Itprid2	0.313593	0.00213121	0.0614533	-0.137935	0.184216	0.609319	0.455752	2.97e-05	0.00124723
ENSMUSG00000020709	Adap2	0.332375	0.12942	0.527432	-0.511925	0.0179944	NA	0.851174	3.05e-05	0.00127554
ENSMUSG00000063684	Hadhb-ps	0.308895	0.019552	0.208171	-0.193151	0.145684	0.571432	0.503921	3.1e-05	0.00129165
ENSMUSG00000044583	Tlr7	0.776512	0.0293027	0.262285	-0.759429	0.0349548	NA	1.54407	3.18e-05	0.00132278
ENSMUSG00000020573	Pik3cg	0.613809	0.0419177	0.314785	-0.591458	0.0501614	NA	1.21563	3.27e-05	0.00135587
ENSMUSG00000029126	Nsg1	-0.0576979	0.391612	0.785282	0.195903	0.00454191	0.199942	-0.253479	3.31e-05	0.00136827
ENSMUSG00000078503	Zfp990	4.73881	0.00253744	0.0683977	-1.54892	0.211564	NA	6.1976	3.37e-05	0.00138162
ENSMUSG00000032508	Myd88	0.475497	0.0218956	0.221564	-0.3067	0.130713	NA	0.778732	3.36e-05	0.00138162
ENSMUSG00000020611	Gna13	0.0867775	0.34382	0.759829	-0.26	0.00533919	0.212085	0.347921	3.4e-05	0.00138762
ENSMUSG00000079057	Cyp4v3	0.225312	0.237175	0.671932	-0.488223	0.010893	NA	0.715135	3.5e-05	0.00142771
ENSMUSG00000002602	Axl	0.65902	0.00211684	0.0612656	-0.263232	0.230412	0.648096	0.930838	3.53e-05	0.00143547
ENSMUSG00000029759	Pon3	1.38156	0.00936045	0.139539	-0.678296	0.204895	NA	2.07237	3.73e-05	0.0015104
ENSMUSG00000028581	Laptm5	0.944685	0.00479354	0.0958404	-0.38085	0.267073	0.683495	1.33215	3.85e-05	0.00155347
ENSMUSG00000030208	Emp1	0.33779	0.231036	0.664438	-0.71648	0.0105718	NA	1.0626	3.93e-05	0.00158268
ENSMUSG00000038612	Mcl1	0.144309	0.115314	0.50324	-0.199391	0.0325277	0.376704	0.344826	3.99e-05	0.00159879
ENSMUSG00000022451	Twf1	0.222631	0.0133401	0.169338	-0.111853	0.219626	0.639618	0.334368	4.01e-05	0.00160394
ENSMUSG00000048826	Dact2	-0.402211	0.00789942	0.127453	0.164363	0.290776	0.707289	-0.566425	4.06e-05	0.00161477
ENSMUSG00000039168	Dap	0.479927	0.00259938	0.0697085	-0.154235	0.325152	NA	0.641494	4.14e-05	0.00164024
ENSMUSG00000025534	Gusb	0.631882	0.0049881	0.0972195	-0.247282	0.279706	0.693595	0.885228	4.16e-05	0.00164024
ENSMUSG00000047230	Cldn2	2.13666	0.0878238	0.451159	-2.56511	0.043011	NA	4.70726	4.16e-05	0.00164024
ENSMUSG00000044976	Wdr72	2.64794	0.0728278	0.412577	-3.01203	0.0311557	NA	5.64613	4.24e-05	0.00166149
ENSMUSG00000041736	Tspo	0.980017	0.00284769	0.0721798	-0.304968	0.355502	NA	1.29379	4.33e-05	0.00168509
ENSMUSG00000048277	Syngr2	0.645781	0.019373	0.20802	-0.395773	0.155307	NA	1.04752	4.38e-05	0.00170274
ENSMUSG00000063193	Cd300lb	4.96308	0.00297853	0.0739457	-1.30388	0.346345	NA	6.37345	4.41e-05	0.00170929
ENSMUSG00000038453	Srcin1	-0.131138	0.0553802	0.362323	0.121628	0.083132	0.493101	-0.252824	4.59e-05	0.00177522
ENSMUSG00000025026	Add3	0.320431	0.0147713	0.179113	-0.202569	0.132501	0.553269	0.527197	4.63e-05	0.00178451
ENSMUSG00000032181	Scg3	0.140736	0.148998	0.558429	-0.238608	0.0169147	0.321466	0.381403	4.89e-05	0.00188351
ENSMUSG00000021477	Ctsl	0.339767	0.0688797	0.402995	-0.366274	0.0554758	0.432052	0.708408	4.93e-05	0.00189317
ENSMUSG00000027187	Cat	0.265636	0.00361489	0.0824219	-0.0692247	0.453814	0.813864	0.335904	5.02e-05	0.00192001
ENSMUSG00000041390	Mdfic	0.770597	0.190645	0.614438	-1.13386	0.0581866	NA	1.91011	5.2e-05	0.00198136
ENSMUSG00000028494	Plin2	0.688943	0.00270859	0.0708245	-0.204825	0.371862	NA	0.9045	5.31e-05	0.00201252
ENSMUSG00000036181	H1f2	0.500531	0.0648954	0.39149	-0.502006	0.0697102	0.463931	1.0022	5.34e-05	0.00201252
ENSMUSG00000024070	Prkd3	0.209503	0.0903237	0.455878	-0.244185	0.0505215	0.42088	0.454738	5.34e-05	0.00201252
ENSMUSG00000017057	Il13ra1	0.363934	0.128979	0.52675	-0.573084	0.0179267	NA	0.952046	5.42e-05	0.00203877
ENSMUSG00000009246	Trpm5	1.64827	0.0182564	0.201051	-1.0011	0.101801	NA	2.62693	5.49e-05	0.00206066
ENSMUSG00000001827	Folr1	1.97455	0.169866	0.587207	-3.41495	0.0188809	NA	5.35988	5.53e-05	0.00206833
ENSMUSG00000033488	Cryzl2	0.712968	0.00181798	0.055988	-0.20536	0.37364	NA	0.92666	5.64e-05	0.00210499
ENSMUSG00000015947	Fcgr1	1.17235	0.0022806	0.0634329	-0.352303	0.362522	NA	1.54774	5.65e-05	0.00210547
ENSMUSG00000030342	Cd9	0.817086	0.0131702	0.168112	-0.459114	0.173924	0.602808	1.2822	5.69e-05	0.0021165
ENSMUSG00000061232	H2-K1	0.881817	0.0907489	0.456546	-1.09629	0.0401201	0.398556	1.98179	5.73e-05	0.00212256
ENSMUSG00000040616	Tmem51	0.439384	0.0386411	0.300616	-0.352781	0.0907786	NA	0.787411	5.75e-05	0.00212369
ENSMUSG00000024411	Aqp4	0.588859	0.00367515	0.0832116	-0.261251	0.208871	0.632402	0.857495	5.97e-05	0.00219332
ENSMUSG00000031840	Rab3a	-0.105943	0.0307095	0.267963	0.0873797	0.0820055	0.491266	-0.194541	6.03e-05	0.00221012
ENSMUSG00000031799	Tpm4	0.269201	0.0493844	0.342749	-0.270467	0.0514199	0.421652	0.543641	6.09e-05	0.00222996
ENSMUSG00000026879	Gsn	0.600422	0.00208416	0.0605409	-0.143869	0.471186	0.823244	0.747232	6.16e-05	0.0022492
ENSMUSG00000040229	Gpr34	0.506568	0.0144404	0.177534	-0.277735	0.18567	0.609319	0.791331	6.26e-05	0.00228272
ENSMUSG00000041431	Ccnb1	1.58216	0.0556235	0.362406	-1.44742	0.0505122	NA	3.04808	6.4e-05	0.00232548
ENSMUSG00000031971	Ccsap	-0.215697	0.00916974	0.138029	0.0838519	0.322522	0.737432	-0.299685	6.42e-05	0.00232723
ENSMUSG00000026029	Casp8	0.634151	0.0344822	0.283118	-0.447645	0.128782	NA	1.08492	6.63e-05	0.00239477
ENSMUSG00000025877	Hk3	0.884681	0.017732	0.198127	-0.50109	0.169904	NA	1.39296	6.71e-05	0.00241752
ENSMUSG00000019088	Dnase1l1	0.801208	0.0203114	0.213282	-0.459975	0.164647	NA	1.26936	6.77e-05	0.00243318
ENSMUSG00000035390	Brsk1	-0.121433	0.102221	0.481159	0.159117	0.0367661	0.385878	-0.281875	6.85e-05	0.00244755
ENSMUSG00000036989	Trim3	-0.118483	0.0517616	0.349833	0.10922	0.0795162	0.484549	-0.229024	7.12e-05	0.00252884
ENSMUSG00000003623	Crot	0.0935625	0.354856	0.766824	-0.269188	0.0085142	0.261299	0.362928	7.12e-05	0.00252884
ENSMUSG00000020777	Acox1	0.12378	0.0395253	0.303736	-0.0979623	0.110482	0.528447	0.222612	7.26e-05	0.00256765
ENSMUSG00000027775	Mfsd1	0.129664	0.152097	0.562402	-0.194671	0.0328914	0.376799	0.325244	7.3e-05	0.00257549
ENSMUSG00000095115	Itpripl2	0.408586	0.127318	0.523967	-0.555679	0.0401363	NA	0.968001	7.35e-05	0.00258725
ENSMUSG00000026880	Stom	0.350326	0.047819	0.337687	-0.341943	0.0565234	0.43439	0.701229	7.44e-05	0.002612
ENSMUSG00000026958	Dpp7	0.182231	0.214413	0.646724	-0.351172	0.0175836	0.321466	0.535883	7.52e-05	0.00263348
ENSMUSG00000056666	Retsat	0.165489	0.251852	0.687605	-0.352683	0.0153976	0.312829	0.519563	7.72e-05	0.0026943
ENSMUSG00000040552	C3ar1	1.57093	0.00338012	0.0791615	-0.787702	0.145875	NA	2.354	7.86e-05	0.00272958
ENSMUSG00000021306	Gpr137b	0.185033	0.384963	0.782759	-0.595408	0.0059016	0.223085	0.781936	8.18e-05	0.00283027
ENSMUSG00000037887	Dusp8	-0.0822473	0.209391	0.639857	0.151543	0.0238803	0.344515	-0.234119	8.31e-05	0.00286158
ENSMUSG00000024978	Gpam	0.385372	0.0092755	0.138823	-0.18154	0.230978	0.64858	0.570464	8.47e-05	0.00290918
ENSMUSG00000018654	Ikzf1	0.5842	0.0214939	0.219395	-0.464473	0.0678966	NA	1.06006	8.48e-05	0.00290918
ENSMUSG00000035781	R3hdm4	-0.0995334	0.373131	0.775539	0.302679	0.00831088	0.260212	-0.402637	8.5e-05	0.00291198
ENSMUSG00000031146	Plp2	0.556428	0.00715807	0.119797	-0.378335	0.0546635	NA	0.935948	8.73e-05	0.00296724
ENSMUSG00000027935	Rab13	0.364054	0.0939903	0.465215	-0.403917	0.0590986	NA	0.768028	8.74e-05	0.00296724
ENSMUSG00000024900	Cpt1a	0.192179	0.104228	0.48503	-0.241929	0.0438807	0.406801	0.436888	8.74e-05	0.00296724
ENSMUSG00000031375	Bgn	0.415163	0.202841	0.630717	-0.749293	0.0243138	0.344515	1.17345	9.02e-05	0.00304417
ENSMUSG00000035095	Fam167a	1.01218	0.00187665	0.0572651	-0.221503	0.490564	NA	1.26108	9.62e-05	0.00323911
ENSMUSG00000017740	Slc12a5	-0.0799853	0.240912	0.677631	0.163693	0.0193058	0.33307	-0.244216	9.67e-05	0.00325138
ENSMUSG00000037843	Vstm2l	0.0487475	0.741113	0.934611	0.597606	7.98e-05	0.0371166	-0.545821	9.88e-05	0.00331543
ENSMUSG00000046447	Camk2n1	-0.546864	0.00383504	0.0847647	0.156017	0.421626	0.796581	-0.700808	0.000100178	0.00334672
ENSMUSG00000008604	Ubqln4	-0.172021	0.0241409	0.234907	0.113556	0.146282	0.572333	-0.287086	0.000100062	0.00334672
ENSMUSG00000057193	Slc44a2	0.264536	0.00435575	0.0909754	-0.0873838	0.351444	0.756149	0.354164	0.00010051	0.00335101
ENSMUSG00000028874	Fgr	4.09293	0.00226104	0.0633373	-1.0667	0.406635	NA	5.08003	0.000101709	0.00337754
ENSMUSG00000099974	Bcl2a1d	3.61603	0.00907903	0.137568	-1.46541	0.22401	NA	5.16577	0.000101784	0.00337754
ENSMUSG00000002603	Tgfb1	0.703444	0.0161057	0.187482	-0.425225	0.149089	NA	1.13617	0.000101921	0.00337754
ENSMUSG00000059498	Fcgr3	0.827462	0.0779896	0.42629	-0.846743	0.0776436	0.480509	1.67909	0.000103419	0.00340467
ENSMUSG00000026051	Ecrg4	1.73734	0.132877	0.535056	-2.36384	0.044718	NA	4.10098	0.000103357	0.00340467
ENSMUSG00000026883	Dab2ip	-0.0945906	0.153142	0.564494	0.138585	0.0408314	0.400518	-0.23375	0.000103171	0.00340467
ENSMUSG00000033207	Mamdc2	0.31789	0.36072	0.76801	-0.932253	0.00690831	NA	1.26434	0.000103567	0.00340467
ENSMUSG00000036995	Asap3	0.770056	0.00635552	0.112855	-0.268716	0.339625	NA	1.04665	0.000104153	0.00341408
ENSMUSG00000055629	B4galnt4	-0.116519	0.153287	0.564494	0.170666	0.0410927	0.400842	-0.287281	0.000104267	0.00341408
ENSMUSG00000037225	Fgf2	0.464161	0.00742865	0.122735	-0.213615	0.216927	NA	0.68656	0.000106964	0.00349543
ENSMUSG00000022575	Gsdmd	0.822159	0.00513319	0.098858	-0.291921	0.308442	NA	1.11437	0.000107823	0.00350348
ENSMUSG00000055322	Tns1	0.446346	0.00909129	0.137568	-0.198904	0.254976	0.670916	0.652992	0.000108061	0.00350348
ENSMUSG00000059182	Skap2	0.36509	0.0119026	0.159055	-0.144897	0.323547	0.738505	0.510304	0.000107851	0.00350348
ENSMUSG00000026600	Soat1	0.178505	0.108435	0.493931	-0.22034	0.0508206	0.42088	0.400896	0.000109613	0.00354679
ENSMUSG00000037086	Prr32	2.48929	0.154062	0.565113	-3.78668	0.0262819	NA	6.31472	0.000109937	0.00355033
ENSMUSG00000017760	Ctsa	0.485779	0.00628571	0.11225	-0.173097	0.341755	0.751651	0.662593	0.000112071	0.00361214
ENSMUSG00000026433	Rab29	0.53656	0.0177819	0.198327	-0.285618	0.203557	NA	0.828362	0.000114106	0.00367055
ENSMUSG00000025225	Nfkb2	0.736555	0.0184499	0.202473	-0.362952	0.242147	NA	1.10458	0.000115268	0.00370071
ENSMUSG00000039158	Akna	0.489233	0.0328162	0.278009	-0.363864	0.111161	NA	0.862735	0.000115915	0.00371424
ENSMUSG00000026536	Ifi211	2.83788	0.0709813	0.40752	-2.67683	0.0506018	NA	5.54223	0.000117124	0.00374566
ENSMUSG00000071714	Csf2rb2	0.626427	0.0896729	0.454517	-0.685417	0.0609301	NA	1.32159	0.00011735	0.00374566
ENSMUSG00000050912	Tmem123	0.292195	0.0630307	0.38482	-0.266109	0.0945601	0.508093	0.561311	0.00011884	0.00378586
ENSMUSG00000061758	Akr1b10	0.408025	0.0028174	0.071998	-0.0800511	0.55886	0.864271	0.490183	0.000119438	0.00379759
ENSMUSG00000069892	9930111J21Rik2	0.932493	0.00496178	0.0971039	-0.332129	0.301769	NA	1.27888	0.000120088	0.00381088
ENSMUSG00000021760	Gpx8	0.668056	0.0965322	0.469225	-0.742355	0.065589	NA	1.41318	0.000121185	0.0038383
ENSMUSG00000031103	Elf4	0.747239	0.0697309	0.404512	-0.747165	0.0653482	NA	1.51505	0.00012352	0.0038898
ENSMUSG00000028333	Anp32b	0.166389	0.0145649	0.178261	-0.0688586	0.313327	0.72932	0.235547	0.000127172	0.00399718
ENSMUSG00000059995	Atxn7l3	-0.130305	0.0212487	0.218011	0.0745185	0.198278	0.622689	-0.205956	0.00013014	0.00406718
ENSMUSG00000029922	Mkrn1	-0.0510466	0.366106	0.771976	0.146327	0.0111999	0.292335	-0.19781	0.000130087	0.00406718
ENSMUSG00000043445	Pgp	0.0845349	0.190508	0.614325	0.318791	1.35e-06	0.00304985	-0.232941	0.00013177	0.00411031
ENSMUSG00000003812	Dnase2a	0.74028	0.00672285	0.115844	-0.255479	0.350605	NA	1.00191	0.000133776	0.00414331
ENSMUSG00000026003	Acadl	0.250659	0.0268862	0.248788	-0.158392	0.167898	0.59808	0.412881	0.000133397	0.00414331
ENSMUSG00000051212	Gpr183	0.930548	0.0342388	0.281655	-0.675227	0.119642	NA	1.62727	0.000133834	0.00414331
ENSMUSG00000031639	Tlr3	0.278925	0.112439	0.49911	-0.361486	0.0420643	0.40291	0.644638	0.000133558	0.00414331
ENSMUSG00000004730	Adgre1	0.889888	0.00643842	0.113297	-0.319091	0.335205	NA	1.21885	0.000135448	0.00417759
ENSMUSG00000018102	H2bc4	0.374343	0.0416079	0.313922	-0.27448	0.140618	0.564229	0.645694	0.000137198	0.00421575
ENSMUSG00000027800	Tm4sf1	0.275853	0.241454	0.678549	-0.540677	0.0239861	0.344515	0.815736	0.000141842	0.00435036
ENSMUSG00000026579	F5	1.36819	0.327303	0.747557	-3.49578	0.0142953	0.307746	4.85906	0.000142548	0.00436389
ENSMUSG00000027962	Vcam1	0.505677	0.0287646	0.260225	-0.339245	0.15101	0.579698	0.855706	0.000145655	0.00445072
ENSMUSG00000037815	Ctnna1	0.370287	0.00409615	0.0881795	-0.123121	0.34996	0.75611	0.497194	0.000148591	0.00449869
ENSMUSG00000037706	Cd81	0.324348	0.00442916	0.0918261	-0.0847356	0.468148	0.822115	0.410926	0.000148528	0.00449869
ENSMUSG00000030523	Trpm1	1.24488	0.114803	0.502264	-1.46703	0.0310689	NA	2.73056	0.000148066	0.00449869
ENSMUSG00000029151	Slc30a3	-0.0408561	0.825955	0.957642	0.604534	0.00153419	0.136846	-0.645974	0.000148452	0.00449869
ENSMUSG00000020097	Sgpl1	0.356238	0.0326141	0.276782	-0.269034	0.113801	0.53338	0.629699	0.000150308	0.00453378
ENSMUSG00000022094	Slc39a14	0.227692	0.0454133	0.330614	-0.166195	0.150354	0.579492	0.392927	0.000150088	0.00453378
ENSMUSG00000053199	Arhgap20	-0.347678	0.00224435	0.062982	0.0518502	0.656893	0.90335	-0.400737	0.00015262	0.00458369
ENSMUSG00000041797	Abca9	0.332637	0.112117	0.498987	-0.425572	0.044875	0.407826	0.771005	0.00015279	0.00458369
ENSMUSG00000040345	Arhgap9	1.55191	0.00639314	0.113242	-0.512349	0.357278	NA	2.08298	0.000153595	0.0045986
ENSMUSG00000027808	Serp1	0.189489	0.0154915	0.184462	-0.0807508	0.307891	0.723183	0.27123	0.000153845	0.0045986
ENSMUSG00000027366	Sppl2a	0.14632	0.228434	0.662507	-0.27079	0.0286559	0.367146	0.417142	0.000156279	0.0046629
ENSMUSG00000041771	Slc24a4	0.0648871	0.618437	0.897813	0.543614	4.77e-05	0.0277156	-0.476524	0.000156597	0.00466392
ENSMUSG00000060126	Tpt1	0.17328	0.0324001	0.275971	-0.107258	0.195807	0.620885	0.281331	0.000157052	0.00466903
ENSMUSG00000042707	Dnali1	0.767102	0.0514323	0.34914	-0.588596	0.127566	NA	1.35253	0.000157453	0.00467252
ENSMUSG00000021763	Cspg4b	0.806437	0.0739709	0.415756	-0.755452	0.0962896	NA	1.57211	0.000160251	0.00473847
ENSMUSG00000042389	Tsen2	-0.387118	0.0081124	0.129636	0.118991	0.428234	0.798412	-0.50754	0.000161545	0.00476526
ENSMUSG00000075284	Wipf1	0.365964	0.0208868	0.215674	-0.197939	0.215886	0.636977	0.567323	0.000164994	0.00484172
ENSMUSG00000004267	Eno2	-0.0999275	0.182075	0.602381	0.156127	0.0421779	0.40291	-0.256091	0.000165212	0.00484172
ENSMUSG00000023456	Tpi1	-0.105536	0.0180972	0.19996	0.0580405	0.204469	0.629285	-0.16466	0.000166253	0.00486357
ENSMUSG00000039865	Slc44a3	2.35351	0.0113173	0.155414	-0.977645	0.197305	NA	3.3459	0.000170306	0.00494027
ENSMUSG00000023143	Nagpa	0.33852	0.0279828	0.254927	-0.199509	0.194593	NA	0.542074	0.000169725	0.00494027
ENSMUSG00000049502	Dtx3l	0.37513	0.0746749	0.417729	-0.345359	0.102523	NA	0.723726	0.000170375	0.00494027
ENSMUSG00000043587	Pxylp1	-0.171593	0.139219	0.543071	0.231805	0.0511032	0.42088	-0.404939	0.000170266	0.00494027
ENSMUSG00000020256	Aldh1l2	0.739548	0.024324	0.235087	-0.449665	0.174479	NA	1.19776	0.000172977	0.00498936
ENSMUSG00000053465	Hs6st3	-0.190528	0.14323	0.548723	0.253716	0.0572492	0.436432	-0.44434	0.000172728	0.00498936
ENSMUSG00000020132	Rab21	0.0274762	0.632889	0.902113	-0.168703	0.00383853	0.186882	0.195644	0.000172877	0.00498936
ENSMUSG00000020790	Ankfy1	0.133886	0.0569202	0.367488	-0.111778	0.115894	0.535743	0.247137	0.000174412	0.00501321
ENSMUSG00000043131	Mob1a	0.329342	0.0659102	0.392723	-0.296214	0.104513	0.522285	0.629743	0.000174123	0.00501321
ENSMUSG00000007041	Clic1	0.815405	0.00538322	0.101557	-0.209652	0.479643	NA	1.03433	0.000176529	0.00506522
ENSMUSG00000040711	Sh3pxd2b	0.489248	0.00219455	0.0623156	-0.140287	0.385616	0.776888	0.639443	0.000178497	0.00506689
ENSMUSG00000020668	Kif3c	-0.172551	0.0037935	0.0847168	0.0613569	0.314853	0.730858	-0.235926	0.000178417	0.00506689
ENSMUSG00000042129	Rassf4	0.633872	0.0334908	0.279951	-0.407391	0.178509	NA	1.04886	0.000178741	0.00506689
ENSMUSG00000047735	Samd9l	0.43183	0.111076	0.497849	-0.662457	0.0146317	NA	1.14276	0.000178658	0.00506689
ENSMUSG00000048108	Tmem72	1.8764	0.302353	0.729314	-4.37466	0.0178181	0.322355	6.25446	0.00018071	0.00511391
ENSMUSG00000018008	Cyth4	0.669063	0.00316308	0.076828	-0.137115	0.552175	0.862971	0.810729	0.000183065	0.00514
ENSMUSG00000034792	Gna15	0.815729	0.00424025	0.0897471	-0.192456	0.488691	NA	1.0226	0.000183362	0.00514
ENSMUSG00000058099	Nfam1	0.701133	0.0202384	0.212961	-0.340143	0.259592	NA	1.04775	0.000183482	0.00514
ENSMUSG00000029712	Actl6b	-0.194363	0.0235896	0.231261	0.124286	0.157487	0.586024	-0.32055	0.000182573	0.00514
ENSMUSG00000042066	Tmcc2	-0.104028	0.269266	0.703663	0.223034	0.0209568	0.339816	-0.328229	0.000181965	0.00514
ENSMUSG00000028497	Hacd4	0.247861	0.300255	0.728498	-0.602519	0.0117313	NA	0.858993	0.000183504	0.00514
ENSMUSG00000037703	Lzts3	-0.0911691	0.490247	0.843924	0.36151	0.00768851	0.252556	-0.452443	0.00018684	0.00522455
ENSMUSG00000041143	Tmco4	0.549785	0.00505727	0.0981172	-0.227028	0.237341	NA	0.779505	0.000187172	0.00522496
ENSMUSG00000020917	Acly	-0.165169	0.0112831	0.155414	0.0550993	0.409147	0.787442	-0.220497	0.000187578	0.00522742
ENSMUSG00000030934	Oat	0.273844	0.0208298	0.215674	-0.144312	0.233471	0.651117	0.420424	0.000190754	0.0052924
ENSMUSG00000023018	Smarcd1	-0.165637	0.051101	0.347963	0.130828	0.132806	0.553655	-0.295557	0.000190874	0.0052924
ENSMUSG00000004707	Ly9	2.45746	0.00819361	0.129932	-0.853213	0.362329	NA	3.30622	0.000193754	0.00535424
ENSMUSG00000020949	Fkbp3	-0.109463	0.170422	0.588227	0.162763	0.0462679	0.408203	-0.273395	0.000194361	0.00536203
ENSMUSG00000048481	Mypop	0.0308697	0.732192	0.933128	0.348473	0.00015465	0.0495894	-0.315764	0.000195677	0.0053893
ENSMUSG00000059040	Eno1b	1.67039	0.020704	0.215329	-1.06141	0.151248	0.579698	2.66842	0.000198713	0.00544994
ENSMUSG00000021408	Ripk1	0.471654	0.0727475	0.412496	-0.423609	0.108322	NA	0.902016	0.000199125	0.00544994
ENSMUSG00000027111	Itga6	0.282455	0.0896886	0.454517	-0.302636	0.0740576	0.473959	0.588792	0.000199202	0.00544994
ENSMUSG00000015652	Steap1	2.97786	0.0534012	0.355142	-2.37803	0.109148	NA	5.36491	0.000199814	0.00545759
ENSMUSG00000060002	Chpt1	0.0456422	0.541507	0.866579	-0.207162	0.00625895	0.23096	0.253812	0.00020327	0.0055428
ENSMUSG00000063576	Klhdc3	-0.0893685	0.139786	0.543549	0.119928	0.0527472	0.427135	-0.210449	0.000205035	0.00557248
ENSMUSG00000032812	Arap1	0.450182	0.00710877	0.119365	-0.124839	0.459694	0.81699	0.5782	0.000209968	0.00568777
ENSMUSG00000034706	Dnai2	0.713624	0.00814224	0.129772	-0.195895	0.458676	NA	0.91462	0.000211539	0.00571156
ENSMUSG00000020585	Laptm4a	0.139981	0.0784567	0.426625	-0.127662	0.116726	0.53654	0.268065	0.000211268	0.00571156
ENSMUSG00000038034	Igsf8	-0.160375	0.0604353	0.376881	0.139446	0.111359	0.529673	-0.301525	0.00021347	0.00574486
ENSMUSG00000020519	Sap30l	-0.0822494	0.40157	0.791704	0.285745	0.004412	0.199161	-0.36328	0.000213155	0.00574486
ENSMUSG00000033420	Antxr1	0.314649	0.113286	0.500224	-0.363943	0.0716165	0.469262	0.68266	0.000218117	0.00586033
ENSMUSG00000025666	Tmem47	0.203818	0.0781572	0.42629	-0.206936	0.0807321	0.488755	0.414044	0.000221782	0.00593942
ENSMUSG00000030403	Vasp	0.393015	0.00696011	0.118375	-0.104931	0.470697	NA	0.500518	0.00022222	0.0059415
ENSMUSG00000034310	Tmem132d	-0.468981	0.0016564	0.0529646	0.0327156	0.830883	0.956341	-0.500866	0.000224641	0.0059965
ENSMUSG00000051934	Spats2	-0.126765	0.126511	0.522833	0.163692	0.0534427	0.428569	-0.292671	0.00022575	0.00601634
ENSMUSG00000018932	Map2k3	0.300924	0.0525625	0.353	-0.219628	0.155393	NA	0.522445	0.000226867	0.00603361
ENSMUSG00000047284	Neurl4	-0.125739	0.0603454	0.376849	0.112772	0.0997677	0.514253	-0.240116	0.00022713	0.00603361
ENSMUSG00000048120	Entpd1	0.396598	0.0147423	0.179029	-0.258135	0.115896	0.535743	0.665728	0.000228129	0.00605037
ENSMUSG00000048142	Nat8l	-0.104857	0.164125	0.579059	0.155758	0.0439217	0.406801	-0.261926	0.000231155	0.00612079
ENSMUSG00000066900	Suds3	-0.0238593	0.67297	0.915251	0.165947	0.00400456	0.193238	-0.190283	0.000231644	0.00612387
ENSMUSG00000026380	Tfcp2l1	0.4289	0.100219	0.477188	-0.455788	0.0841273	NA	0.892151	0.000233249	0.00615643
ENSMUSG00000013275	Slc41a1	0.219835	0.0255734	0.242393	-0.128631	0.20071	0.626521	0.350465	0.000236371	0.00622885
ENSMUSG00000064215	Ifi27	0.672224	0.00226815	0.0634233	-0.0874911	0.697435	0.916024	0.764659	0.000237587	0.00625089
ENSMUSG00000005087	Cd44	1.00873	0.00697848	0.118431	-0.675513	0.0752105	NA	1.68035	0.000240047	0.00630554
ENSMUSG00000015850	Adamtsl4	0.715696	0.00650064	0.113761	-0.165836	0.533809	NA	0.882102	0.000241577	0.00633562
ENSMUSG00000054728	Phactr1	-0.205349	0.0217508	0.221216	0.100026	0.275995	0.691187	-0.304766	0.000243707	0.00637119
ENSMUSG00000050732	Vamp8	0.617195	0.0274392	0.25214	-0.318668	0.25898	NA	0.937934	0.000244417	0.00637964
ENSMUSG00000026896	Ifih1	0.654336	0.0339227	0.280913	-0.451776	0.146716	NA	1.13102	0.000247513	0.00644474
ENSMUSG00000050556	Kcnb1	-0.248586	0.00991359	0.144908	0.0730748	0.459919	0.81699	-0.322123	0.000248862	0.00646421
ENSMUSG00000016349	Eef1a2	-0.12401	0.0561273	0.364329	0.0953538	0.152305	0.57995	-0.220123	0.00025275	0.00653528
ENSMUSG00000029070	Mxra8	0.498283	0.0830314	0.438749	-0.460141	0.112399	NA	0.964623	0.000252761	0.00653528
ENSMUSG00000021823	Vcl	0.225846	0.123522	0.517062	-0.286081	0.0541535	0.430122	0.518185	0.000254383	0.0065669
ENSMUSG00000030401	Rtn2	-0.242127	0.0113934	0.155682	0.0905565	0.355766	0.760201	-0.3346	0.000258449	0.00664065
ENSMUSG00000055172	C1ra	-0.0619338	0.844168	0.963834	-1.13161	0.000275616	NA	1.05863	0.000258176	0.00664065
ENSMUSG00000034926	Dhcr24	-0.387273	0.00274452	0.0711718	0.0669452	0.613953	0.885884	-0.458522	0.00026072	0.00668858
ENSMUSG00000089715	Cbx6	-0.144236	0.108047	0.493451	0.156654	0.0889277	0.501175	-0.301793	0.000261184	0.00669006
ENSMUSG00000024957	Kcnk4	-0.397957	0.00687081	0.117492	0.127463	0.400387	NA	-0.530956	0.000262992	0.00672589
ENSMUSG00000049130	C5ar1	0.652534	0.126918	0.523084	-0.757442	0.0699659	NA	1.41624	0.000263485	0.00672805
ENSMUSG00000037224	Zfyve28	-0.159481	0.185425	0.606625	0.264142	0.0325219	0.376704	-0.421776	0.000264307	0.00673861
ENSMUSG00000039146	Ifi44l	4.85791	0.0104632	0.14989	-1.48115	0.373587	NA	6.40527	0.000268724	0.00683006
ENSMUSG00000059887	Or4e5	3.5482	0.0590487	0.374627	-2.52564	0.127733	NA	6.18215	0.000268494	0.00683006
ENSMUSG00000056919	Cep162	0.00577179	0.954552	0.989825	-0.328749	0.00102677	0.113837	0.332951	0.000269291	0.00683393
ENSMUSG00000045322	Tlr9	0.842677	0.0160392	0.186985	-0.390182	0.258216	NA	1.24856	0.000271057	0.00685762
ENSMUSG00000028763	Hspg2	0.424008	0.0998729	0.477053	-0.439993	0.0919606	NA	0.859704	0.000270823	0.00685762
ENSMUSG00000025809	Itgb1	0.170415	0.174828	0.592739	-0.251123	0.050045	0.420231	0.4239	0.000274135	0.00691426
ENSMUSG00000007950	Abhd8	-0.0907472	0.343821	0.759829	0.231484	0.018574	0.325762	-0.321117	0.00027497	0.00692471
ENSMUSG00000035283	Adrb1	-0.352489	0.0192423	0.206835	0.145184	0.348182	0.75547	-0.498467	0.000275808	0.0069352
ENSMUSG00000040867	Begain	-0.0679281	0.553128	0.870928	0.311913	0.00794288	0.254693	-0.380308	0.000276613	0.00694485
ENSMUSG00000098112	Bin2	0.78063	0.00250887	0.0678496	-0.0809136	0.755499	NA	0.864237	0.000279232	0.00699196
ENSMUSG00000027712	Anxa5	0.455249	0.0131729	0.168112	-0.232968	0.21445	0.63606	0.695526	0.000281829	0.00699196
ENSMUSG00000031447	Lamp1	0.254357	0.020459	0.214199	-0.124627	0.267858	0.683803	0.381322	0.000281467	0.00699196
ENSMUSG00000028871	Rspo1	-0.848431	0.119221	0.510506	1.09056	0.0559846	NA	-1.91841	0.000281617	0.00699196
ENSMUSG00000039405	Prss23	0.257312	0.15316	0.564494	-0.338013	0.0615441	NA	0.593633	0.000280299	0.00699196
ENSMUSG00000070000	Fcho1	-0.144322	0.230924	0.664347	0.261605	0.0342874	0.377324	-0.405079	0.000281768	0.00699196
ENSMUSG00000028194	Ddah1	0.139172	0.247047	0.68267	-0.272117	0.0269194	0.358839	0.413746	0.000279716	0.00699196
ENSMUSG00000001802	Lrp3	-0.127258	0.0651036	0.392144	0.112019	0.112316	0.530706	-0.240548	0.000282701	0.00700164
ENSMUSG00000030270	Cpne9	-0.4267	0.124708	0.519838	0.500523	0.080081	0.487033	-0.925523	0.000285112	0.00704078
ENSMUSG00000038697	Taf5l	-0.110764	0.200728	0.627874	0.182893	0.0384928	0.391197	-0.292141	0.000285564	0.00704078
ENSMUSG00000056413	Adap1	-0.0965023	0.219785	0.652178	0.163263	0.0428072	0.403319	-0.260357	0.000285412	0.00704078
ENSMUSG00000002489	Tiam1	-0.120968	0.321419	0.744222	0.283249	0.0236561	0.344515	-0.404844	0.000286214	0.00704625
ENSMUSG00000052911	Lamb2	0.244816	0.14639	0.553407	-0.323792	0.0595353	0.444484	0.575271	0.00028923	0.00710988
ENSMUSG00000006235	Epor	-0.0158019	0.933315	0.987362	0.731925	0.000185377	NA	-0.736228	0.000290907	0.00714045
ENSMUSG00000026571	Dcaf6	-0.182114	0.00340598	0.0791615	0.0290507	0.647481	0.900216	-0.212254	0.000291629	0.00714265
ENSMUSG00000031273	Col4a6	0.859326	0.0523852	0.35211	-0.624531	0.152188	NA	1.52536	0.000291864	0.00714265
ENSMUSG00000026173	Plcd4	0.372757	0.0387508	0.301162	-0.267895	0.142862	0.566785	0.645948	0.000298454	0.00729308
ENSMUSG00000039942	Ptger4	0.46648	0.101722	0.479912	-0.460923	0.0918692	NA	0.93264	0.000300761	0.00733208
ENSMUSG00000042380	Smim12	-0.19387	0.0504381	0.345676	0.131888	0.193178	0.617317	-0.327073	0.000303279	0.00736726
ENSMUSG00000039031	Arhgap18	0.373518	0.0975625	0.471897	-0.397304	0.0788107	NA	0.776956	0.000305542	0.0074113
ENSMUSG00000040152	Thbs1	0.392424	0.384275	0.782649	-1.08792	0.0166182	NA	1.47901	0.000306117	0.00741434
ENSMUSG00000039236	Isg20	1.32586	0.0279169	0.254638	-0.688249	0.228347	NA	2.02789	0.000308052	0.00743932
ENSMUSG00000002844	Adprh	-0.0798828	0.183267	0.602836	0.125196	0.0410108	0.400842	-0.206449	0.000307993	0.00743932
ENSMUSG00000034863	Ano8	-0.0650911	0.454698	0.824603	0.220289	0.0134259	0.306888	-0.285557	0.000308767	0.00744567
ENSMUSG00000034707	Gns	0.275895	0.0206819	0.215243	-0.139377	0.25329	0.670274	0.418031	0.000309377	0.00744946
ENSMUSG00000000628	Hk2	0.521891	0.00937658	0.139539	-0.176997	0.379751	NA	0.701142	0.00031022	0.00745887
ENSMUSG00000011751	Sptbn4	-0.0635278	0.588217	0.882174	0.32236	0.00742034	0.248401	-0.38598	0.000312553	0.00749309
ENSMUSG00000006219	Fblim1	1.14885	0.00694513	0.118248	-0.638647	0.126545	NA	1.7846	0.000313177	0.00749713
ENSMUSG00000021822	Plau	0.189862	0.624915	0.900307	-1.07368	0.00582676	NA	1.26193	0.000316167	0.00754678
ENSMUSG00000002897	Il17ra	0.0268461	0.856998	0.967348	-0.463287	0.00205663	0.160711	0.492701	0.000316062	0.00754678
ENSMUSG00000031387	Renbp	1.00283	0.00960994	0.141537	-0.318706	0.412137	NA	1.33979	0.000318415	0.00758943
ENSMUSG00000054452	Tle5	-0.00433165	0.955266	0.989881	0.24868	0.00169001	0.144319	-0.25343	0.000318908	0.00758981
ENSMUSG00000039004	Bmp6	0.423589	0.178155	0.596867	-0.614927	0.0552382	0.431076	1.05154	0.000319964	0.00759339
ENSMUSG00000079017	Ifi27l2a	2.49156	0.00281142	0.071998	-0.280269	0.733748	NA	2.80592	0.000321814	0.00762629
ENSMUSG00000026786	Apbb1ip	0.797376	0.00555697	0.103838	-0.217034	0.454592	NA	1.02373	0.000324822	0.00768651
ENSMUSG00000060090	Rp2	0.242878	0.0737127	0.415008	-0.205394	0.133703	0.554799	0.45102	0.00033365	0.0078841
ENSMUSG00000026922	Agpat2	0.799546	0.0126596	0.164979	-0.303169	0.323981	NA	1.12282	0.000334734	0.00788707
ENSMUSG00000034839	Larp6	0.0849612	0.342024	0.758243	0.378188	3.5e-05	0.0244363	-0.292897	0.000335747	0.00789965
ENSMUSG00000028163	Nfkb1	0.463783	0.00339112	0.0791615	-0.0823622	0.60636	0.883368	0.550052	0.00034048	0.0079655
ENSMUSG00000069893	9930111J21Rik1	1.22766	0.0136702	0.172	-0.396162	0.392916	NA	1.62866	0.000340247	0.0079655
ENSMUSG00000057666	Gapdh	0.303055	0.0261091	0.245691	-0.1696	0.222244	0.642054	0.469237	0.000339295	0.0079655
ENSMUSG00000046229	Scand1	0.0279237	0.822792	0.956915	0.439613	0.000580225	0.0892848	-0.413184	0.000340432	0.0079655
ENSMUSG00000005986	Ankrd13d	-0.167895	0.0969905	0.470434	0.162906	0.115914	0.535743	-0.331938	0.000341145	0.00796973
ENSMUSG00000029781	Fkbp9	0.330134	0.00242743	0.0662276	-0.0605881	0.584196	0.873411	0.393667	0.000343872	0.00799939
ENSMUSG00000026688	Mgst3	-0.313523	0.00393416	0.0861108	0.0392986	0.724389	0.924872	-0.353374	0.000343615	0.00799939
ENSMUSG00000006675	P4htm	-0.0411147	0.542733	0.866764	0.178133	0.00979208	0.275095	-0.219575	0.000345615	0.00802861
ENSMUSG00000075012	Fjx1	-0.194132	0.046879	0.334715	0.124326	0.214398	0.63606	-0.318094	0.000346106	0.00802869
ENSMUSG00000025468	Caly	-0.0310431	0.721402	0.931309	0.259985	0.0035738	0.178671	-0.292253	0.000347452	0.00804856
ENSMUSG00000026686	Lmx1a	2.73565	0.0339682	0.280913	-1.64967	0.160006	NA	4.34995	0.000350548	0.00810888
ENSMUSG00000000031	H19	2.71343	0.0103867	0.149339	-0.924717	0.315421	NA	3.66183	0.000351283	0.00811449
ENSMUSG00000036461	Elf1	0.308351	0.113401	0.500224	-0.321219	0.0999468	NA	0.630795	0.000356049	0.00818854
ENSMUSG00000024059	Clip4	-0.119778	0.129749	0.527967	0.135929	0.0927948	0.505444	-0.255596	0.000356469	0.00818854
ENSMUSG00000030610	Det1	-0.116971	0.479496	0.837839	0.426317	0.012402	NA	-0.543303	0.000356477	0.00818854
ENSMUSG00000022901	Cd86	1.10347	0.00475023	0.0953934	-0.353136	0.36898	NA	1.4698	0.000357324	0.00819428
ENSMUSG00000033685	Ucp2	1.09878	0.00563109	0.104725	-0.285909	0.48189	0.828416	1.38851	0.000357722	0.00819428
ENSMUSG00000080059	Rps19-ps3	0.769374	0.0408875	0.31086	-0.486116	0.163768	NA	1.24249	0.00036173	0.00826309
ENSMUSG00000054509	Parp4	0.334134	0.0478757	0.337687	-0.270958	0.106417	NA	0.610245	0.000363167	0.00828444
ENSMUSG00000033066	Gas7	-0.240512	0.00466538	0.0947241	0.0477089	0.584123	0.873411	-0.289713	0.000368401	0.00838062
ENSMUSG00000020483	Dynll2	-0.0937234	0.136461	0.540286	0.110221	0.0877503	0.498467	-0.204443	0.00036801	0.00838062
ENSMUSG00000007815	Rhoa	0.168986	0.0213944	0.219032	-0.0719515	0.336511	0.747543	0.242004	0.000370625	0.00841959
ENSMUSG00000079436	Kcnj13	1.55657	0.37629	0.777197	-4.22564	0.0167276	NA	5.7508	0.000371258	0.00842234
ENSMUSG00000021266	Wars1	-0.122377	0.307248	0.734481	0.268958	0.0287384	0.367152	-0.392392	0.000374248	0.0084785
ENSMUSG00000044927	H1f10	-0.128666	0.380071	0.781168	0.346508	0.0212287	0.341173	-0.476128	0.000375469	0.00849446
ENSMUSG00000030329	Pianp	-0.111738	0.152894	0.56427	0.145145	0.0699463	0.463931	-0.256039	0.00037647	0.00850544
ENSMUSG00000035200	Chrnb4	2.10968	0.0663679	0.394467	-1.70001	0.10468	NA	3.83586	0.000377061	0.00850713
ENSMUSG00000029468	P2rx7	0.483277	0.024261	0.235087	-0.248006	0.253124	NA	0.737184	0.000378112	0.00850832
ENSMUSG00000056130	Ticam2	1.00217	0.0317439	0.272224	-0.512824	0.241615	NA	1.52051	0.000378148	0.00850832
ENSMUSG00000074406	Zfp628	-0.0273601	0.816857	0.955767	0.363388	0.00266001	0.172975	-0.389334	0.000379037	0.00851671
ENSMUSG00000040483	Xaf1	1.19893	0.00198813	0.0596251	-0.136624	0.726183	NA	1.34527	0.000381976	0.00855317
ENSMUSG00000022781	Pak2	0.21191	0.00381747	0.0847647	-0.050233	0.498105	0.83623	0.264253	0.000381969	0.00855317
ENSMUSG00000015950	Ncf1	0.781149	0.00766317	0.124536	-0.184261	0.533199	NA	0.969313	0.000383309	0.00855317
ENSMUSG00000029600	Rita1	-0.218031	0.100266	0.477188	0.219813	0.106337	0.525162	-0.440462	0.00038312	0.00855317
ENSMUSG00000024790	Sac3d1	-0.195458	0.186453	0.607654	0.281711	0.0636982	NA	-0.47659	0.00038344	0.00855317
ENSMUSG00000063406	Tmed5	0.0705275	0.416101	0.802172	-0.208737	0.0174462	0.321466	0.28025	0.000384983	0.00856846
ENSMUSG00000047180	Neurl3	1.07466	0.0273556	0.251831	-0.52164	0.275121	NA	1.60667	0.000401187	0.00889306
ENSMUSG00000089774	Slc5a3	-0.00770883	0.96029	0.990515	-0.506207	0.00136333	0.126776	0.499049	0.000401077	0.00889306
ENSMUSG00000047428	Dlk2	-0.194023	0.176483	0.594644	0.273974	0.0631417	0.45131	-0.466979	0.000402201	0.00890356
ENSMUSG00000087366	Junos	0.787607	0.037067	0.294345	-0.426477	0.227914	NA	1.21847	0.000403685	0.00892442
ENSMUSG00000041852	Tcf20	-0.0974882	0.122875	0.515514	0.104481	0.105753	0.524114	-0.202281	0.000404685	0.00893453
ENSMUSG00000063063	Ctnna2	-0.183045	0.0113235	0.155414	0.0503336	0.496327	0.835222	-0.233843	0.000408065	0.00896777
ENSMUSG00000026113	Inpp4a	-0.146931	0.0548036	0.360804	0.0992585	0.205429	0.629285	-0.245797	0.000408368	0.00896777
ENSMUSG00000024529	Lox	0.658847	0.369622	0.773141	-1.67821	0.0209921	NA	2.41551	0.000407559	0.00896777
ENSMUSG00000036966	Spryd3	-0.0334001	0.580818	0.880505	0.161975	0.00884551	0.263636	-0.19603	0.000407906	0.00896777
ENSMUSG00000041845	Rhod	1.6066	0.00631318	0.112485	-0.339682	0.519981	NA	1.95952	0.000413279	0.00906353
ENSMUSG00000033538	Casp4	1.26362	0.0549609	0.361306	-0.847682	0.171987	NA	2.11368	0.000415185	0.00908138
ENSMUSG00000053110	Yap1	0.226208	0.107252	0.491675	-0.245509	0.0846664	0.495391	0.476741	0.000416819	0.00909273
ENSMUSG00000049036	Tmem121	-0.198171	0.170752	0.588458	0.279752	0.0596771	0.444484	-0.480632	0.00041647	0.00909273
ENSMUSG00000015981	Stk32c	-0.15157	0.214966	0.647286	0.258894	0.0389989	0.394627	-0.408299	0.000418866	0.0091253
ENSMUSG00000003500	Impdh1	-0.195984	0.0205957	0.214811	0.0782315	0.365928	0.764494	-0.273323	0.000421323	0.00916669
ENSMUSG00000030536	Iqgap1	0.251713	0.176435	0.594617	-0.353044	0.0625831	0.45131	0.608087	0.000424034	0.00921352
ENSMUSG00000030220	Arhgdib	0.550742	0.0792292	0.428004	-0.503684	0.112909	NA	1.06207	0.000425866	0.00924113
ENSMUSG00000030584	Dpf1	-0.0403254	0.697741	0.92201	0.292176	0.00598535	0.225335	-0.332385	0.000430217	0.00932326
ENSMUSG00000032431	Crtap	0.594927	0.00204353	0.0602107	-0.0756851	0.692155	NA	0.677408	0.000431173	0.0093317
ENSMUSG00000001751	Naglu	0.53369	0.0288127	0.260225	-0.287871	0.244999	NA	0.826507	0.000432909	0.00934589
ENSMUSG00000005268	Prlr	1.43123	0.197778	0.622987	-2.13147	0.0609469	0.446206	3.57046	0.000432964	0.00934589
ENSMUSG00000069227	Gprin1	-0.220806	0.00957241	0.141159	0.0848074	0.331832	0.745352	-0.307964	0.000436546	0.00941088
ENSMUSG00000041329	Atp1b2	0.186433	0.119858	0.511784	-0.213227	0.0828564	0.492635	0.401582	0.00043721	0.00941287
ENSMUSG00000025017	Pik3ap1	0.900677	0.00743517	0.122735	-0.324548	0.33927	NA	1.23884	0.000441478	0.00949235
ENSMUSG00000025887	Casp12	0.55259	0.234987	0.668694	-0.955964	0.0353535	NA	1.54597	0.000449488	0.00963942
ENSMUSG00000035513	Ntng2	-0.287716	0.0517793	0.349833	0.189663	0.211611	0.633346	-0.47871	0.000453888	0.00972112
ENSMUSG00000023074	Mospd1	0.114141	0.494904	0.846741	-0.421361	0.0121769	NA	0.532701	0.00045643	0.00976286
ENSMUSG00000079014	Serpina3i	2.07233	0.0699379	0.405114	-1.83769	0.0718219	NA	4.06892	0.000459271	0.00981089
ENSMUSG00000050708	Ftl1	0.408074	0.00467924	0.094883	-0.122159	0.407651	0.78652	0.534739	0.000461284	0.00983596
ENSMUSG00000074238	Ap1ar	-0.103173	0.331868	0.751111	0.236868	0.0297864	0.37229	-0.339673	0.000464602	0.00988629
ENSMUSG00000053012	Krcc1	0.337966	0.0140162	0.174675	-0.113003	0.412243	0.79104	0.455044	0.00047294	0.0100507
ENSMUSG00000005413	Hmox1	0.763744	0.011648	0.157431	-0.322707	0.292317	NA	1.08629	0.000482804	0.010234
ENSMUSG00000073490	Ifi207	1.44295	0.125064	0.520356	-1.63268	0.0759864	NA	3.13007	0.000482422	0.010234
ENSMUSG00000001435	Col18a1	0.508085	0.185519	0.606625	-0.713362	0.0666139	NA	1.22417	0.000483614	0.0102379
ENSMUSG00000033161	Atp1a1	-0.250963	0.00852404	0.13229	0.0673774	0.491358	0.832114	-0.320536	0.000488809	0.0103082
ENSMUSG00000048895	Cdk5r1	-0.143715	0.121271	0.513811	0.152109	0.109929	0.528181	-0.296551	0.000488583	0.0103082
ENSMUSG00000017756	Slc12a7	0.172029	0.456779	0.825569	-0.558163	0.0166995	NA	0.733635	0.000487871	0.0103082
ENSMUSG00000029605	Oas1b	2.31088	0.00701957	0.118871	-0.497288	0.512826	NA	2.85504	0.000491279	0.0103338
ENSMUSG00000058135	Gstm1	0.127272	0.193176	0.617757	-0.182681	0.0680495	0.46167	0.310124	0.000491135	0.0103338
ENSMUSG00000020544	Cox11	0.0306509	0.841365	0.962795	0.525817	0.000849465	NA	-0.498143	0.000495591	0.0104112
ENSMUSG00000043207	Zmpste24	0.0636216	0.501832	0.850626	-0.247718	0.00973954	0.275095	0.30913	0.000503707	0.0105548
ENSMUSG00000014177	Tvp23b	0.160705	0.0783686	0.426441	-0.128569	0.161421	0.591628	0.29072	0.000508391	0.0106394
ENSMUSG00000018865	Sult4a1	-0.134968	0.0550931	0.361306	0.103471	0.151659	0.579698	-0.240226	0.00050921	0.010643
ENSMUSG00000026979	Psd4	0.909434	0.045618	0.331373	-0.589959	0.18815	NA	1.51306	0.000512903	0.010693
ENSMUSG00000041827	Oasl1	1.85752	0.0156236	0.184745	-0.789443	0.270626	NA	2.76439	0.000519555	0.0108083
ENSMUSG00000079419	Ms4a6c	2.10775	0.00525018	0.100084	-0.368804	0.609345	NA	2.59959	0.000526329	0.0109315
ENSMUSG00000035208	Slfn8	1.6094	0.00588663	0.107693	-0.344124	0.548364	NA	1.98678	0.000532347	0.0110425
ENSMUSG00000046613	Vwa5b2	-0.448663	0.00475583	0.0953934	0.0640478	0.694887	0.915704	-0.51013	0.000533945	0.0110617
ENSMUSG00000071068	Treml2	2.61703	0.00448284	0.0923529	-0.462569	0.595083	NA	3.05072	0.000536509	0.0110731
ENSMUSG00000048004	Tmem196	-0.298357	0.0246818	0.237703	0.150653	0.26997	NA	-0.444472	0.000536089	0.0110731
ENSMUSG00000024220	Zfp523	-0.0195753	0.835878	0.961205	0.284654	0.00327559	0.17509	-0.303291	0.000536303	0.0110731
ENSMUSG00000037731	Themis2	1.43235	0.00214909	0.0618288	-0.137866	0.759629	NA	1.6046	0.000540548	0.0111425
ENSMUSG00000035367	Rmi1	0.178705	0.110725	0.497849	-0.171545	0.12201	NA	0.351621	0.000545644	0.0112194
ENSMUSG00000017607	Tns4	1.17956	0.192522	0.617381	-1.68827	0.0501832	NA	2.87238	0.000545299	0.0112194
ENSMUSG00000029426	Scarb2	0.136392	0.133421	0.53622	-0.154177	0.0972155	0.511606	0.291678	0.000547924	0.0112522
ENSMUSG00000028238	Atp6v0d2	3.65308	0.0502823	0.344934	-2.65342	0.119967	NA	6.47541	0.000549892	0.0112786
ENSMUSG00000022416	Cacna1i	-0.204229	0.128883	0.526665	0.222037	0.107651	0.525602	-0.426953	0.000551917	0.0113061
ENSMUSG00000029419	Ajm1	-0.110242	0.405239	0.794354	0.308281	0.0233198	0.344515	-0.418186	0.000554075	0.0113362
ENSMUSG00000020978	Klhdc2	-0.204822	0.00182055	0.055988	0.00580136	0.931231	0.984819	-0.211664	0.000556307	0.0113547
ENSMUSG00000041548	Hspb8	0.345508	0.0237318	0.231787	-0.188656	0.222258	0.642054	0.541561	0.000557051	0.0113547
ENSMUSG00000033306	Lpp	0.0665425	0.617456	0.89752	-0.351679	0.00792226	NA	0.41559	0.000559027	0.0113669
ENSMUSG00000030451	Herc2	-0.179129	0.0371256	0.294661	0.102492	0.244955	0.664037	-0.283022	0.000560553	0.0113839
ENSMUSG00000026385	Dbi	0.356128	0.00558634	0.104139	-0.0652339	0.619339	0.88694	0.423791	0.000562825	0.0114019
ENSMUSG00000074622	Mafb	0.34638	0.125616	0.52127	-0.387888	0.0924256	0.505444	0.740391	0.000562214	0.0114019
ENSMUSG00000028445	Enho	-0.102961	0.333985	0.753117	0.231365	0.0340514	0.376799	-0.334959	0.000566401	0.0114602
ENSMUSG00000068335	Dok1	0.814051	0.014753	0.179029	-0.227143	0.481624	NA	1.03875	0.000568199	0.0114684
ENSMUSG00000022791	Tnk2	0.01482	0.870724	0.971444	0.306255	0.00104229	0.113837	-0.290411	0.000567528	0.0114684
ENSMUSG00000022054	Nefm	-0.0794512	0.333744	0.75302	0.178718	0.033938	0.376799	-0.257912	0.000571314	0.0115172
ENSMUSG00000021903	Galnt15	1.03568	0.00821679	0.130037	-0.381475	0.337828	NA	1.46855	0.00057924	0.0116553
ENSMUSG00000030276	Ttll3	0.220852	0.154034	0.565113	-0.26511	0.0863023	NA	0.483563	0.000579581	0.0116553
ENSMUSG00000033540	Idua	0.279968	0.00942909	0.140055	-0.0711441	0.505369	0.838656	0.354877	0.000581112	0.0116718
ENSMUSG00000040097	Flywch1	-0.0731924	0.283985	0.715182	0.141916	0.0426116	0.403303	-0.214539	0.00058213	0.0116781
ENSMUSG00000028677	Rnf220	-0.0346662	0.557723	0.871668	0.149217	0.013602	0.306888	-0.184081	0.000582989	0.0116811
ENSMUSG00000043090	Zfp866	0.065464	0.553406	0.870928	-0.282148	0.0108659	0.287052	0.346233	0.000584143	0.01169
ENSMUSG00000002668	Dennd1c	0.727501	0.103129	0.48324	-0.656418	0.133189	NA	1.38843	0.000587882	0.0117466
ENSMUSG00000060950	Trmt61a	-0.188655	0.15258	0.563258	0.238813	0.0773821	0.480509	-0.430825	0.000589113	0.0117466
ENSMUSG00000024087	Cyp1b1	0.171331	0.703135	0.924225	-1.22671	0.00733166	NA	1.40945	0.000588843	0.0117466
ENSMUSG00000019433	Gipc1	-0.125684	0.0989439	0.474704	0.110464	0.15537	0.583408	-0.236417	0.000591093	0.0117718
ENSMUSG00000029471	Camkk2	-0.255557	0.0795241	0.428004	0.202212	0.176457	0.603983	-0.458099	0.000592094	0.0117775
ENSMUSG00000049553	Polr1a	0.317811	0.0267163	0.248136	-0.130383	0.37156	0.767892	0.44837	0.000595917	0.0118393
ENSMUSG00000041859	Mcm3	0.642163	0.031547	0.270908	-0.293934	0.325047	NA	0.939164	0.000597297	0.0118483
ENSMUSG00000079465	Col4a3	1.71069	0.0881478	0.451955	-1.52529	0.120403	NA	3.20263	0.000597828	0.0118483
ENSMUSG00000060147	Serpinb6a	0.0623499	0.541119	0.866579	-0.252686	0.0140367	0.307726	0.31529	0.00059994	0.011862
ENSMUSG00000032902	Slc16a1	0.210561	0.180646	0.599682	-0.28351	0.0775494	0.480509	0.496188	0.000608982	0.0120263
ENSMUSG00000022614	Lmf2	0.253893	0.0139949	0.174548	-0.0887215	0.388502	0.779227	0.34665	0.000613106	0.0120788
ENSMUSG00000026875	Traf1	1.38581	0.00728345	0.120993	-0.251721	0.608469	NA	1.64767	0.000616683	0.0121347
ENSMUSG00000039476	Prrx2	0.518304	0.217488	0.650148	-0.811481	0.04379	NA	1.35192	0.000618957	0.0121649
ENSMUSG00000000753	Serpinf1	0.11742	0.541632	0.866579	-0.500511	0.0102097	0.276648	0.623661	0.000620066	0.0121722
ENSMUSG00000044628	Rnf208	-0.0921331	0.284489	0.715182	0.177321	0.044362	0.407826	-0.270359	0.000621752	0.0121908
ENSMUSG00000029767	Calu	0.037823	0.645807	0.906472	-0.216851	0.00969501	0.275095	0.254656	0.000627288	0.0122847
ENSMUSG00000032192	Gnb5	-0.0629678	0.40472	0.793633	0.171127	0.0269503	0.358839	-0.23422	0.000628735	0.0122984
ENSMUSG00000039257	Vstm2b	-0.253132	0.0872548	0.4494	0.210406	0.166066	0.596466	-0.462786	0.000632525	0.0123579
ENSMUSG00000079227	Ccr5	0.741206	0.00565207	0.104991	-0.115771	0.666566	NA	0.867163	0.000635687	0.0123722
ENSMUSG00000029718	Pcolce	0.748597	0.225259	0.659028	-1.15758	0.0660103	NA	1.92441	0.000636264	0.0123722
ENSMUSG00000025647	Shisa5	0.158522	0.259246	0.694528	-0.282838	0.0485332	0.41623	0.443196	0.000635688	0.0123722
ENSMUSG00000021114	Atp6v1d	-0.138736	0.0146968	0.179029	0.0499961	0.390352	0.779425	-0.190036	0.000641211	0.012439
ENSMUSG00000040061	Plcb2	0.503148	0.108435	0.493931	-0.521153	0.0975735	NA	1.02743	0.000640957	0.012439
ENSMUSG00000063558	Aox1	0.400045	0.0263269	0.24656	-0.196699	0.274001	NA	0.601263	0.000652743	0.012633
ENSMUSG00000041263	Rusc1	-0.158105	0.0332774	0.279317	0.0763432	0.315617	0.731367	-0.235697	0.000653996	0.0126424
ENSMUSG00000035805	Mlc1	0.371422	0.00858437	0.132716	-0.116148	0.422667	0.796729	0.492261	0.000656733	0.0126656
ENSMUSG00000049225	Pdp1	-0.319684	0.0168593	0.192127	0.160984	0.241106	0.660007	-0.475218	0.000656108	0.0126656
ENSMUSG00000003872	Lin7b	0.0255343	0.831629	0.959759	0.412442	0.000794485	0.0998367	-0.388898	0.000664883	0.0128077
ENSMUSG00000038179	Slamf7	1.56148	0.234922	0.668694	-2.53584	0.0302922	NA	4.07423	0.000674957	0.0129866
ENSMUSG00000045679	Pqlc3	-0.0733048	0.845053	0.964065	-1.25038	0.000809679	NA	1.16037	0.000679636	0.0130614
ENSMUSG00000040794	C1qtnf4	0.0948059	0.463247	0.828418	0.496694	0.000180151	0.050354	-0.401497	0.000682312	0.0130975
ENSMUSG00000038213	Tapbpl	0.520244	0.00368006	0.0832116	-0.0448873	0.800459	NA	0.569659	0.000683666	0.0131082
ENSMUSG00000027570	Col9a3	1.19352	0.0436694	0.322493	-0.62681	0.300234	0.71656	1.82272	0.000688728	0.0131899
ENSMUSG00000029127	Zbtb49	0.0168815	0.907067	0.981043	0.468471	0.00158583	NA	-0.454208	0.00069128	0.0132234
ENSMUSG00000026727	Rsu1	0.204413	0.0625773	0.383467	-0.140632	0.202434	0.62749	0.347601	0.000701639	0.013406
ENSMUSG00000009905	Kdsr	0.0964871	0.218855	0.651062	-0.1462	0.0634531	0.45145	0.242038	0.000705275	0.0134599
ENSMUSG00000017715	Pgs1	-0.0735032	0.359552	0.767957	0.173517	0.0345049	0.378019	-0.246717	0.000708937	0.0135141
ENSMUSG00000020329	Polrmt	0.014314	0.855121	0.966862	0.26167	0.00104572	0.113837	-0.24611	0.000711201	0.0135416
ENSMUSG00000052372	Il1rapl1	-0.439298	0.00585454	0.107356	0.0490064	0.764562	0.934621	-0.48928	0.000714747	0.0135934
ENSMUSG00000035004	Igsf6	1.4399	0.00597866	0.108447	-0.301023	0.557144	NA	1.77914	0.000716968	0.013617
ENSMUSG00000068748	Ptprz1	0.0834102	0.36125	0.768496	-0.197802	0.0345538	0.378019	0.281631	0.000717643	0.013617
ENSMUSG00000040093	Bmf	0.706964	0.0557225	0.36275	-0.483697	0.196015	NA	1.20092	0.000723385	0.0137102
ENSMUSG00000020806	Rhbdf2	1.03176	0.00492258	0.0966979	-0.121051	0.730622	NA	1.15998	0.000726252	0.0137487
ENSMUSG00000051735	Rinl	0.412892	0.182249	0.602575	-0.525199	0.0837457	NA	0.940932	0.000728519	0.0137758
ENSMUSG00000048385	Scrt1	-0.11178	0.247594	0.683284	0.197315	0.046582	0.408262	-0.307383	0.000734087	0.0138652
ENSMUSG00000001891	Ugp2	0.114153	0.179132	0.597296	-0.145717	0.092323	0.505444	0.260452	0.000741519	0.0139895
ENSMUSG00000031647	Mfap3l	0.261521	0.0813917	0.432983	-0.205224	0.181297	0.607526	0.468822	0.00074334	0.0140078
ENSMUSG00000045967	Gpr158	-0.294985	0.00333398	0.0791615	0.0133113	0.897257	0.973559	-0.308204	0.000751962	0.0141541
ENSMUSG00000074364	Ehd2	0.395939	0.0646574	0.391255	-0.299071	0.167122	NA	0.705353	0.00076166	0.0143202
ENSMUSG00000037921	Ddx60	1.71384	0.00174229	0.0545421	-0.156317	0.770541	NA	1.90462	0.000763877	0.0143216
ENSMUSG00000058254	Tspan7	-0.166997	0.00175761	0.0545754	0.00221523	0.96773	0.994852	-0.170089	0.000764096	0.0143216
ENSMUSG00000021709	Erbin	0.444189	0.00288888	0.0725407	-0.040376	0.791381	0.945286	0.486911	0.000764339	0.0143216
ENSMUSG00000030824	Nucb1	0.297081	0.00222014	0.062751	-0.00996644	0.919728	0.981828	0.30873	0.00077945	0.0145716
ENSMUSG00000046402	Rbp1	0.124865	0.746902	0.93553	-1.11646	0.0045553	NA	1.21389	0.000786428	0.0146687
ENSMUSG00000026285	Pdcd1	3.49512	0.010184	0.147504	-0.825336	0.526741	NA	4.30328	0.000789593	0.0147079
ENSMUSG00000032369	Plscr1	0.715391	0.0149296	0.18006	-0.194242	0.497167	NA	0.91385	0.000790315	0.0147079
ENSMUSG00000070003	Ssbp4	0.104976	0.288793	0.718455	0.407584	5.86e-05	0.0320307	-0.302534	0.000793456	0.0147497
ENSMUSG00000022099	Dmtn	-0.0759905	0.368645	0.772887	0.182282	0.0355069	0.379408	-0.258628	0.000797069	0.0148001
ENSMUSG00000031825	Crispld2	0.361512	0.351674	0.764815	-0.844876	0.031588	NA	1.2348	0.00079936	0.014826
ENSMUSG00000035890	Rnf126	-0.0316428	0.737125	0.93388	0.255564	0.00809212	0.255948	-0.287095	0.000801862	0.0148325
ENSMUSG00000030047	Arhgap25	0.109491	0.765862	0.941747	-1.01256	0.00650325	NA	1.13344	0.000801808	0.0148325
ENSMUSG00000015396	Cd83	0.573073	0.0146392	0.178753	-0.160257	0.501806	0.837506	0.736359	0.000803689	0.0148394
ENSMUSG00000026442	Nfasc	0.263244	0.00464416	0.0946107	-0.020331	0.830975	0.956341	0.283549	0.00080513	0.0148494
ENSMUSG00000004552	Ctse	3.71955	0.0102091	0.147731	-0.917066	0.474318	NA	4.80006	0.000810778	0.0149093
ENSMUSG00000021069	Pygl	0.241461	0.205015	0.633964	-0.335704	0.0767428	NA	0.579352	0.000811097	0.0149093
ENSMUSG00000039546	Ajap1	-0.104788	0.485927	0.842069	0.364823	0.0180965	0.322994	-0.468345	0.000812801	0.0149125
ENSMUSG00000052430	Bmpr1b	0.0462296	0.73099	0.932807	-0.365274	0.00745969	0.248401	0.413246	0.000813078	0.0149125
ENSMUSG00000030104	Edem1	0.275994	0.0593898	0.37533	-0.172214	0.245963	0.664307	0.449847	0.00081759	0.0149619
ENSMUSG00000021259	Cyp46a1	-0.0660295	0.466318	0.830578	0.238706	0.0102167	0.276648	-0.302796	0.000816993	0.0149619
ENSMUSG00000034891	Sncb	-0.224391	0.01836	0.201768	0.0652235	0.504065	0.838085	-0.289758	0.000821619	0.0150189
ENSMUSG00000046982	Tshz1	-0.201351	0.0828186	0.438284	0.177595	0.135685	0.558786	-0.376686	0.000822631	0.0150208
ENSMUSG00000021127	Zfp36l1	0.469936	0.0113015	0.155414	-0.131356	0.485429	0.82996	0.613076	0.000825325	0.0150533
ENSMUSG00000047731	Wbp1l	0.198685	0.029258	0.262285	-0.0809115	0.381125	0.774617	0.280836	0.000828615	0.0150966
ENSMUSG00000033777	Tlr13	0.655553	0.0755124	0.419914	-0.545631	0.143451	NA	1.21044	0.000835992	0.0151973
ENSMUSG00000029007	Agtrap	0.276742	0.106225	0.489826	-0.24818	0.150665	NA	0.528278	0.000841725	0.0152847
ENSMUSG00000027419	Pcsk2	-0.244876	0.00597548	0.108447	0.0366294	0.688526	0.913856	-0.282703	0.000852895	0.0154534
ENSMUSG00000021624	Cd180	1.34602	0.0518577	0.349959	-0.75131	0.285463	NA	2.10313	0.000856227	0.0154798
ENSMUSG00000045009	Prrt3	-0.291405	0.0112992	0.155414	0.0606216	0.607294	0.883855	-0.353312	0.000858331	0.0154838
ENSMUSG00000005699	Pard6a	-0.0253245	0.834182	0.960822	0.364228	0.00329159	0.17509	-0.386198	0.000857668	0.0154838
ENSMUSG00000008855	Hdac5	-0.0822218	0.237088	0.671899	0.127791	0.0727845	0.471654	-0.209941	0.000863584	0.0155615
ENSMUSG00000073155	Stmp1	0.246959	0.111289	0.497849	-0.21929	0.159703	0.588615	0.46746	0.00087991	0.0158384
ENSMUSG00000048921	Zfp689	-0.147958	0.341438	0.757867	0.335174	0.0364629	NA	-0.481435	0.000883824	0.0158915
ENSMUSG00000041199	Rpusd1	-0.138458	0.18457	0.604694	0.183048	0.086834	0.498467	-0.323437	0.00088525	0.0158997
ENSMUSG00000075010	AW112010	0.702154	0.0928087	0.461255	-0.56928	0.15917	NA	1.28309	0.000888648	0.0159434
ENSMUSG00000053158	Fes	0.744607	0.0356247	0.288876	-0.407672	0.252812	NA	1.15799	0.000891277	0.0159604
ENSMUSG00000042659	Arrdc4	0.224794	0.213456	0.645816	-0.317814	0.0811294	NA	0.542569	0.000891537	0.0159604
ENSMUSG00000045348	Nyap1	-0.0244465	0.77967	0.944272	0.249453	0.00530227	0.211613	-0.272179	0.000893983	0.0159869
ENSMUSG00000040385	Ppp1ca	0.0141886	0.810037	0.953038	0.196429	0.00113515	0.115998	-0.181609	0.000895006	0.0159878
ENSMUSG00000034227	Foxj1	0.588372	0.036972	0.293886	-0.267121	0.350323	NA	0.854984	0.000902059	0.0160789
ENSMUSG00000043614	Vps37d	-0.0501	0.652322	0.908048	0.289417	0.0109275	0.287862	-0.340733	0.000901608	0.0160789
ENSMUSG00000041164	Zmiz2	-0.102899	0.193971	0.618756	0.135906	0.0942586	0.508093	-0.238709	0.000906644	0.0161432
ENSMUSG00000003123	Lipe	0.408398	0.0116809	0.157431	-0.0840432	0.600281	NA	0.494997	0.000915268	0.016244
ENSMUSG00000005124	Ccn4	-1.28697	0.00499862	0.0972195	0.089414	0.854157	NA	-1.37799	0.000919234	0.0162618
ENSMUSG00000068245	Phf11d	1.58106	0.00566408	0.10509	-0.342956	0.53634	NA	1.97008	0.000918893	0.0162618
ENSMUSG00000034652	Cd300a	0.773125	0.0919994	0.45943	-0.656214	0.150967	NA	1.43307	0.000918716	0.0162618
ENSMUSG00000032377	Plscr4	0.301122	0.197661	0.622987	-0.414822	0.0762018	NA	0.707869	0.000921329	0.0162814
ENSMUSG00000033386	Frrs1	1.3247	0.00251074	0.0678496	-0.0980049	0.821328	NA	1.43666	0.000923282	0.0162841
ENSMUSG00000036395	Glb1l2	0.916285	0.140658	0.544623	-0.988748	0.104774	NA	1.89584	0.00092346	0.0162841
ENSMUSG00000034957	Cebpa	0.705807	0.00275155	0.0711734	-0.0117528	0.960985	0.993201	0.72173	0.000928853	0.0163442
ENSMUSG00000034353	Ramp1	-0.0779317	0.367915	0.772887	0.182154	0.0395353	0.395836	-0.260035	0.000928384	0.0163442
ENSMUSG00000028362	Tnfsf8	1.32883	0.21445	0.646724	-1.88961	0.0615798	NA	3.23481	0.000931683	0.0163765
ENSMUSG00000037849	Ifi206	3.31965	0.0277123	0.253463	-1.37234	0.295189	NA	4.71319	0.00093505	0.0164007
ENSMUSG00000000247	Lhx2	-0.229234	0.0431782	0.32022	0.128488	0.269103	0.684526	-0.36079	0.000944672	0.0165519
ENSMUSG00000003346	Abhd17a	-0.0479536	0.625777	0.90031	0.251853	0.0124816	0.306888	-0.301024	0.000951541	0.0166368
ENSMUSG00000023043	Krt18	1.80486	0.116928	0.506485	-1.73294	0.129811	NA	3.50913	0.000962241	0.0168061
ENSMUSG00000009291	Pttg1ip	0.224839	0.0169642	0.192764	-0.0952781	0.320224	0.734052	0.32291	0.000979164	0.0169756
ENSMUSG00000047557	Lxn	0.257976	0.04124	0.3126	-0.142369	0.267581	0.683803	0.403923	0.00097612	0.0169756
ENSMUSG00000029798	Herc6	0.380158	0.12929	0.527432	-0.421116	0.0943763	NA	0.820651	0.000978853	0.0169756
ENSMUSG00000025355	Mmp19	0.732222	0.135981	0.539636	-0.728934	0.12696	NA	1.46914	0.000976365	0.0169756
ENSMUSG00000042079	Hnrnpf	0.127988	0.179564	0.597657	-0.156568	0.105453	0.523581	0.284768	0.000975195	0.0169756
ENSMUSG00000022450	Ndufa6	0.0688427	0.432012	0.812191	0.33732	0.000165804	0.050354	-0.267228	0.000978482	0.0169756
ENSMUSG00000070942	Il1rl2	1.06337	0.0555875	0.362406	-0.668453	0.223042	NA	1.76378	0.000982117	0.0170089
ENSMUSG00000055235	Wdr86	1.39642	0.228789	0.662507	-2.10518	0.0706788	NA	3.50789	0.000988882	0.0171081
ENSMUSG00000029673	Auts2	-0.209652	0.111509	0.498112	0.186073	0.168614	0.598275	-0.396007	0.000991415	0.0171339
ENSMUSG00000076435	Acsf2	0.229776	0.168107	0.584341	-0.26807	0.112904	0.531592	0.499677	0.000997807	0.0172082
ENSMUSG00000039672	Kcne2	1.45062	0.414222	0.800571	-3.91316	0.029569	NA	5.36991	0.000997434	0.0172082
ENSMUSG00000047959	Kcna3	-0.426547	0.163083	0.578594	0.492769	0.119959	NA	-0.91984	0.00100697	0.0173481
ENSMUSG00000052934	Fbxo31	-0.0770905	0.357629	0.767248	0.180993	0.035125	0.379182	-0.259756	0.00101307	0.0174094
ENSMUSG00000071072	Ptges3	-0.0533435	0.489673	0.843774	-0.294519	0.000177399	0.050354	0.239503	0.00101307	0.0174094
ENSMUSG00000026796	Niban2	0.401729	0.0208834	0.215674	-0.128978	0.466724	0.821361	0.536404	0.00101875	0.0174415
ENSMUSG00000016206	H2-M3	0.591161	0.0871694	0.449284	-0.505137	0.138421	NA	1.1116	0.00101821	0.0174415
ENSMUSG00000028228	Cpne3	0.241822	0.102545	0.481905	-0.233088	0.120524	0.541624	0.481043	0.00102672	0.0175416
ENSMUSG00000078794	Dact3	-0.0999928	0.285261	0.715182	0.188542	0.0494208	0.418302	-0.290277	0.00102605	0.0175416
ENSMUSG00000031708	Tecr	-0.0791992	0.27501	0.708663	0.142163	0.0559496	0.432101	-0.222352	0.00102969	0.0175742
ENSMUSG00000020388	Pdlim4	0.725025	0.00522395	0.0999624	-0.107418	0.682855	NA	0.839227	0.0010316	0.017583
ENSMUSG00000058756	Thra	-0.0672957	0.458207	0.826718	0.204618	0.027954	0.364343	-0.272595	0.00103235	0.017583
ENSMUSG00000003484	Cyp4f18	2.6655	0.0308483	0.268279	-1.39467	0.198156	NA	4.07349	0.00103519	0.0176132
ENSMUSG00000005233	Spc25	0.599776	0.300902	0.728498	-1.07959	0.0466265	NA	1.68324	0.00105264	0.0178731
ENSMUSG00000036186	Dipk1b	-0.136848	0.115578	0.503412	0.141312	0.111562	0.529689	-0.281737	0.00105684	0.0179108
ENSMUSG00000048960	Prex2	0.00632632	0.942541	0.988589	-0.254189	0.00452746	0.199942	0.260429	0.00105703	0.0179108
ENSMUSG00000000982	Ccl3	4.43141	0.0041904	0.0892964	-0.260696	0.832165	NA	4.74363	0.00106139	0.0179662
ENSMUSG00000041707	Tmem273	1.4348	0.0366689	0.292217	-0.610246	0.345395	NA	2.09975	0.00107138	0.0180981
ENSMUSG00000015133	Lrrk1	0.19134	0.512632	0.854626	-0.67224	0.022531	NA	0.86681	0.00107444	0.0181311
ENSMUSG00000031591	Asah1	0.233344	0.0300004	0.26546	-0.143398	0.189722	0.612915	0.380829	0.00109166	0.0184029
ENSMUSG00000062456	Rpl9-ps6	-0.186475	0.194046	0.618756	0.241235	0.101318	NA	-0.426672	0.00109667	0.0184685
ENSMUSG00000039005	Tlr4	0.327839	0.346439	0.761327	-0.741528	0.0319814	NA	1.08181	0.0010982	0.0184753
ENSMUSG00000004952	Rasa4	0.828276	0.00205708	0.0602107	-0.160852	0.5485	NA	1.00151	0.00110364	0.0184772
ENSMUSG00000000693	Loxl3	0.366182	0.0769928	0.424988	-0.250365	0.220645	NA	0.613096	0.00110377	0.0184772
ENSMUSG00000027907	S100a11	0.458754	0.289019	0.71866	-0.83826	0.0532307	NA	1.31128	0.00110504	0.0184772
ENSMUSG00000030231	Plekha5	-0.0902283	0.36794	0.772887	0.209284	0.0413204	0.401181	-0.299027	0.00110485	0.0184772
ENSMUSG00000000420	Galnt1	0.107957	0.185516	0.606625	-0.134113	0.105303	0.523512	0.243065	0.00111253	0.0185699
ENSMUSG00000048100	Taf13	0.140868	0.242033	0.678669	-0.214587	0.0774726	0.480509	0.354454	0.00111444	0.0185699
ENSMUSG00000041479	Syt15	0.358003	0.401346	0.791444	-0.91855	0.0272583	NA	1.26442	0.00111401	0.0185699
ENSMUSG00000027381	Bcl2l11	0.0172843	0.935263	0.988078	-0.603639	0.00446788	NA	0.618985	0.0011151	0.0185699
ENSMUSG00000014444	Piezo1	0.594533	0.0341912	0.281655	-0.267701	0.345243	NA	0.873137	0.00111658	0.0185759
ENSMUSG00000022952	Runx1	0.691683	0.117662	0.507917	-0.667971	0.13084	NA	1.36226	0.00113153	0.0188055
ENSMUSG00000032526	Ss18l2	-0.108544	0.210468	0.641231	0.147244	0.0955267	0.508429	-0.256028	0.00113878	0.0189069
ENSMUSG00000046378	Asphd1	-0.189864	0.062807	0.384075	0.109777	0.292099	0.709199	-0.300478	0.00114059	0.0189179
ENSMUSG00000020235	Fzr1	-0.0482273	0.457096	0.825637	0.146039	0.0273095	0.360418	-0.195279	0.00114685	0.0190026
ENSMUSG00000037503	Fam168b	-0.132311	0.00435918	0.0909754	0.00824999	0.86212	0.967004	-0.141313	0.00115797	0.0191641
ENSMUSG00000032547	Ryk	0.174817	0.0875659	0.450589	-0.127767	0.216997	0.637522	0.303707	0.00116009	0.0191641
ENSMUSG00000037638	Zbtb42	0.521319	0.205078	0.634035	-0.770223	0.0547025	NA	1.29214	0.00115993	0.0191641
ENSMUSG00000042724	Map3k9	-0.37923	0.00474986	0.0953934	0.0160878	0.907026	0.977698	-0.396916	0.00116508	0.0192273
ENSMUSG00000069793	Slfn9	1.23478	0.0582603	0.371424	-0.745553	0.24568	NA	2.01628	0.00117291	0.0193356
ENSMUSG00000027230	Creb3l1	0.331883	0.129581	0.527691	-0.369591	0.0848247	NA	0.691505	0.00117399	0.0193356
ENSMUSG00000020628	Trappc12	-0.0810526	0.244666	0.681281	0.124083	0.0811478	0.489678	-0.204716	0.00119254	0.0195825
ENSMUSG00000046410	Kcnk6	0.656607	0.0337101	0.28077	-0.301607	0.333254	NA	0.963711	0.00119636	0.0196256
ENSMUSG00000029581	Fscn1	-0.0441985	0.52274	0.858038	0.18585	0.00871029	0.263636	-0.227959	0.00120116	0.0196847
ENSMUSG00000022836	Mylk	0.0475531	0.730352	0.932807	-0.361038	0.00960758	0.275095	0.411278	0.00121232	0.0198375
ENSMUSG00000037740	Mrps26	-0.0269967	0.795094	0.948422	0.27874	0.00877683	0.263636	-0.306668	0.0012141	0.0198375
ENSMUSG00000029060	Mib2	0.00976364	0.877111	0.973157	0.195253	0.00244884	0.168935	-0.185241	0.00121667	0.0198486
ENSMUSG00000020282	Rhbdf1	0.34535	0.0158706	0.186359	-0.134801	0.347915	NA	0.483752	0.00122065	0.0198854
ENSMUSG00000075334	Rprm	-0.402072	0.0350433	0.28608	0.162183	0.407766	0.78652	-0.563112	0.00122479	0.0199331
ENSMUSG00000073002	Vamp5	0.9515	0.00388877	0.0855912	-0.022648	0.943527	NA	0.977765	0.0012362	0.020099
ENSMUSG00000043843	Tmem145	-0.281508	0.0546827	0.36031	0.175251	0.243905	0.662986	-0.452812	0.00124293	0.0201685
ENSMUSG00000022304	Dpys	-0.833044	0.385443	0.782791	2.72222	0.020928	NA	-3.4637	0.00124265	0.0201685
ENSMUSG00000047423	AI837181	0.0195865	0.7296	0.932644	0.188211	0.0010528	0.113837	-0.167888	0.00124785	0.0202283
ENSMUSG00000026389	Steap3	0.240891	0.192393	0.617283	-0.302326	0.103999	NA	0.546434	0.0012536	0.0202817
ENSMUSG00000041012	Cmtm8	0.485045	0.240821	0.677498	-0.754082	0.0604798	NA	1.2218	0.00125358	0.0202817
ENSMUSG00000022108	Itm2b	0.182805	0.00598534	0.108447	-0.0120018	0.860266	0.966254	0.195163	0.00126416	0.0204325
ENSMUSG00000021484	Lman2	0.19923	0.00579701	0.106916	-0.018662	0.799427	0.947686	0.216791	0.00127589	0.0205817
ENSMUSG00000032000	Birc3	0.180619	0.521138	0.857559	-0.655225	0.0177356	NA	0.847042	0.0012775	0.0205875
ENSMUSG00000005686	Ampd3	0.316643	0.0364234	0.292217	-0.163141	0.287931	0.704598	0.486356	0.00128045	0.0206148
ENSMUSG00000055692	Tmem191	0.117711	0.27078	0.704602	0.437035	6.49e-05	0.032749	-0.318658	0.00128474	0.0206638
ENSMUSG00000079575	Rbpj-ps3	-0.806462	0.492375	0.845525	2.79996	0.0233304	NA	-3.63548	0.00129497	0.020808
ENSMUSG00000091537	Tma7	-0.253272	0.00322106	0.0771899	-0.00282728	0.974343	0.995455	-0.251427	0.0012973	0.0208251
ENSMUSG00000116165	Pdxp	-0.0906859	0.275932	0.708663	0.15232	0.0735895	0.472474	-0.24346	0.00130276	0.0208924
ENSMUSG00000010051	Hyal1	0.360811	0.194182	0.618756	-0.48718	0.0755821	NA	0.840823	0.00130777	0.0209523
ENSMUSG00000028068	Iqgap3	1.52572	0.0210749	0.217032	-0.487103	0.446639	NA	2.01225	0.0013189	0.0210488
ENSMUSG00000015291	Gdi1	-0.0925477	0.058037	0.370727	0.0533537	0.286249	0.70229	-0.146584	0.00131757	0.0210488
ENSMUSG00000023050	Map3k12	-0.100272	0.0857482	0.445865	0.0746756	0.209736	0.633072	-0.17599	0.00131882	0.0210488
ENSMUSG00000032220	Myo1e	0.238585	0.228037	0.662507	-0.35808	0.0751769	0.476498	0.601998	0.00131778	0.0210488
ENSMUSG00000068523	Gng5	0.327758	0.0441181	0.324574	-0.15152	0.356377	0.760428	0.482571	0.00132163	0.0210719
ENSMUSG00000000732	Icosl	0.456173	0.00609488	0.109967	-0.0767471	0.648544	0.900308	0.539945	0.00132389	0.0210875
ENSMUSG00000034165	Ccnd3	0.262451	0.0407564	0.310464	-0.134929	0.29773	0.713941	0.402788	0.00133168	0.0211911
ENSMUSG00000020467	Efemp1	0.0883401	0.694732	0.920859	-0.569663	0.0129458	0.306888	0.663629	0.00133369	0.0212026
ENSMUSG00000024397	Aif1	0.876717	0.0107164	0.151753	-0.175594	0.613559	NA	1.06247	0.00134161	0.0213079
ENSMUSG00000022765	Snap29	-0.0160541	0.875622	0.972926	-0.334914	0.00122012	0.121999	0.315843	0.001344	0.0213253
ENSMUSG00000068798	Rap1a	0.205318	0.0113013	0.155414	-0.0312837	0.702854	0.918342	0.237397	0.00134787	0.0213661
ENSMUSG00000007458	M6pr	0.15085	0.014089	0.175165	-0.0293939	0.637542	0.896177	0.180993	0.00135189	0.0214092
ENSMUSG00000035352	Ccl12	1.32618	0.0216952	0.220959	-0.586636	0.292011	NA	1.92451	0.0013564	0.0214601
ENSMUSG00000060275	Nrg2	-0.00251417	0.988532	0.997593	0.543807	0.00255614	NA	-0.542736	0.00137082	0.0216467
ENSMUSG00000032436	Cmtm7	0.746499	0.0143341	0.177091	-0.205211	0.488156	NA	0.955956	0.00138235	0.0217869
ENSMUSG00000046027	Stard5	0.182699	0.157955	0.570504	-0.190377	0.14216	0.565078	0.373954	0.00139573	0.0219762
ENSMUSG00000058886	Deaf1	-0.0781848	0.258604	0.693933	0.121844	0.0836968	0.494137	-0.199994	0.00139703	0.0219762
ENSMUSG00000038774	Ascc3	0.0652038	0.451251	0.823394	-0.184043	0.0337772	0.376799	0.248644	0.00140649	0.0220947
ENSMUSG00000027852	Nras	0.0359928	0.669067	0.913897	-0.206726	0.0151687	0.310826	0.242454	0.00142559	0.0223614
ENSMUSG00000032462	Pik3cb	-0.151155	0.0747458	0.417729	0.103535	0.232067	0.649633	-0.256656	0.00143804	0.0225138
ENSMUSG00000054520	Sh3bp2	0.862346	0.00401194	0.0873235	-0.0488981	0.870828	NA	0.91794	0.00144669	0.0226278
ENSMUSG00000073433	Arhgdig	-0.276977	0.010309	0.148629	0.0499469	0.651593	0.901569	-0.330781	0.00145506	0.0226939
ENSMUSG00000007036	Abhd16a	-0.132866	0.112724	0.49951	0.12993	0.129579	0.55047	-0.264445	0.00145237	0.0226939
ENSMUSG00000027195	Hsd17b12	0.040303	0.594252	0.88535	-0.180806	0.018602	0.325762	0.22033	0.00145407	0.0226939
ENSMUSG00000020689	Itgb3	0.655613	0.00873328	0.134027	-0.0768159	0.753558	NA	0.737723	0.0014574	0.0227089
ENSMUSG00000020437	Myo1g	1.39649	0.0104081	0.149409	-0.241142	0.640816	NA	1.65232	0.00147058	0.022871
ENSMUSG00000027514	Zbp1	1.78899	0.0406448	0.310215	-0.85794	0.302281	NA	2.71337	0.00146937	0.022871
ENSMUSG00000030847	Bag3	0.382888	0.0114435	0.155836	-0.0887388	0.559638	0.86432	0.474424	0.0014768	0.0229461
ENSMUSG00000036565	Ttyh3	0.0269685	0.726349	0.932064	0.2682	0.000686707	0.0983669	-0.239062	0.0014863	0.0230719
ENSMUSG00000031328	Flna	0.486802	0.0126194	0.164979	-0.114824	0.565105	0.86687	0.608537	0.00148976	0.0231039
ENSMUSG00000068396	Rpl34-ps1	1.26081	0.00380656	0.0847647	-0.00789122	0.985734	NA	1.26933	0.0015009	0.0232111
ENSMUSG00000022949	Clic6	2.10095	0.165763	0.581855	-2.3144	0.135891	0.559096	4.41392	0.00149946	0.0232111
ENSMUSG00000030862	Cpxm2	0.237121	0.48532	0.84149	-0.748243	0.0276834	NA	0.97942	0.0015	0.0232111
ENSMUSG00000003099	Ppp5c	-0.0826601	0.113354	0.500224	0.0705737	0.185053	0.609319	-0.154206	0.00150282	0.0232191
ENSMUSG00000048327	Ckap2l	0.609575	0.361471	0.768496	-1.27503	0.0454374	NA	1.8871	0.00150598	0.023246
ENSMUSG00000026222	Sp100	0.886682	0.00215998	0.0618288	-0.101834	0.72177	NA	1.01398	0.00152324	0.0234904
ENSMUSG00000006728	Cdk4	0.197234	0.0152804	0.183027	-0.0416346	0.6097	0.884143	0.240464	0.0015303	0.0235772
ENSMUSG00000003269	Cyth2	-0.183878	0.0109417	0.153115	0.0299753	0.684547	0.912713	-0.215142	0.00154456	0.0237559
ENSMUSG00000014158	Trpv4	1.44721	0.119516	0.511212	-1.23625	0.190901	NA	2.68762	0.00154478	0.0237559
ENSMUSG00000029545	Acads	0.476695	0.0070846	0.119365	-0.0385641	0.826369	NA	0.519162	0.00154838	0.0237889
ENSMUSG00000031274	Col4a5	0.442376	0.122675	0.515514	-0.406611	0.158696	NA	0.866475	0.00155651	0.0238694
ENSMUSG00000027316	Gfra4	-0.100335	0.286048	0.715462	0.173279	0.0716535	0.469262	-0.27466	0.00155529	0.0238694
ENSMUSG00000095098	Ccdc85b	0.190286	0.0602053	0.376849	0.484604	2.99e-06	0.00462924	-0.293571	0.00155953	0.0238935
ENSMUSG00000074102	Rbm15b	-0.119265	0.0545548	0.360071	0.0791636	0.210296	0.633346	-0.200104	0.00156439	0.0239457
ENSMUSG00000074738	Fndc10	-0.0868227	0.384438	0.782649	0.202917	0.046672	0.408666	-0.29095	0.0015697	0.0240046
ENSMUSG00000021886	Gpr65	2.05782	0.0441606	0.324595	-1.10408	0.270508	NA	3.13442	0.00157529	0.0240231
ENSMUSG00000023011	Faim2	-0.108344	0.0741829	0.416649	0.0693881	0.264814	0.681567	-0.178532	0.00157527	0.0240231
ENSMUSG00000043541	Casc1	0.478875	0.232466	0.666034	-0.688739	0.0733962	NA	1.15595	0.0015727	0.0240231
ENSMUSG00000041815	Poldip3	-0.082785	0.311387	0.736904	0.160621	0.0549122	0.431076	-0.242051	0.00157709	0.0240283
ENSMUSG00000018381	Abi3	0.942734	0.0127212	0.165218	-0.158799	0.664326	NA	1.10789	0.00158405	0.0240964
ENSMUSG00000040543	Pitpnm3	-0.229896	0.0945806	0.465997	0.215072	0.12761	0.5476	-0.439247	0.00158448	0.0240964
ENSMUSG00000074652	Myh7b	-0.410433	0.0491346	0.341996	0.207129	0.334783	NA	-0.621489	0.00159138	0.024179
ENSMUSG00000036915	Kirrel2	-0.261901	0.345564	0.761229	0.552211	0.0535255	NA	-0.81123	0.00160043	0.0242941
ENSMUSG00000034663	Bmp2k	0.510952	0.00319236	0.0771814	-0.0274811	0.875796	0.969015	0.544273	0.0016063	0.0243607
ENSMUSG00000032120	C2cd2l	-0.0470193	0.593672	0.884917	0.206024	0.0226003	0.344432	-0.252865	0.00161067	0.0244045
ENSMUSG00000020773	Trim47	0.6898	0.0386298	0.300616	-0.294728	0.376036	NA	0.992245	0.00161333	0.0244223
ENSMUSG00000031165	Was	0.943535	0.0167157	0.191463	-0.253705	0.513614	NA	1.21242	0.00161739	0.0244614
ENSMUSG00000063884	Ptcd3	0.0480875	0.506977	0.852101	-0.157899	0.0302155	0.373636	0.205461	0.00162374	0.0245348
ENSMUSG00000033720	Sfxn5	0.171508	0.0259734	0.245174	-0.0598531	0.447056	0.81162	0.233146	0.00162528	0.0245356
ENSMUSG00000054065	Pkp3	1.18433	0.184412	0.604549	-1.35822	0.079765	NA	2.60615	0.00163084	0.024597
ENSMUSG00000041144	Dnah7b	0.476652	0.136572	0.540286	-0.4404	0.167949	NA	0.928166	0.00163283	0.0246045
ENSMUSG00000041377	Ninj2	0.748015	0.0303879	0.266576	-0.244965	0.468434	NA	0.989723	0.00163465	0.0246093
ENSMUSG00000031166	Wdr13	-0.200242	0.0015769	0.0507962	-0.0038605	0.952574	0.991796	-0.197818	0.00164514	0.0247272
ENSMUSG00000017707	Serinc3	0.0529946	0.470993	0.8332	-0.162149	0.0311788	0.376704	0.21649	0.00164548	0.0247272
ENSMUSG00000040842	Szrd1	0.304535	0.00535766	0.10144	-0.0123024	0.911601	0.978568	0.31842	0.0016523	0.0248071
ENSMUSG00000029761	Cald1	0.16738	0.311778	0.737002	-0.312522	0.0640841	0.453169	0.477581	0.0016618	0.0249167
ENSMUSG00000031788	Kifc3	-0.049897	0.565682	0.87661	0.197848	0.0256722	0.352877	-0.247868	0.00166263	0.0249167
ENSMUSG00000039278	Pcsk1n	0.0444092	0.711557	0.926739	0.39795	0.00124431	0.12298	-0.351767	0.00167327	0.0250534
ENSMUSG00000021824	Ap3m1	0.10405	0.251769	0.687498	-0.156523	0.0890279	0.501429	0.261856	0.00168187	0.0251592
ENSMUSG00000036949	Slc39a12	0.150619	0.199414	0.626411	-0.191355	0.110003	0.528181	0.34377	0.00168367	0.0251634
ENSMUSG00000051851	Rtl8c	-0.117392	0.160655	0.574578	0.120705	0.158368	0.587313	-0.238152	0.00168553	0.0251683
ENSMUSG00000059743	Fdps	-0.160915	0.22674	0.661694	0.226985	0.0963549	0.508804	-0.389845	0.00168883	0.0251947
ENSMUSG00000056290	Ms4a4b	3.36463	0.011375	0.155682	-0.633842	0.581921	NA	4.04041	0.00169382	0.0252237
ENSMUSG00000079598	Clec2l	-0.195483	0.0267823	0.24817	0.0542187	0.547284	0.860825	-0.250148	0.00169613	0.0252237
ENSMUSG00000021608	Lpcat1	0.145667	0.173192	0.590427	-0.161693	0.136905	0.560582	0.308593	0.00169748	0.0252237
ENSMUSG00000054428	Atpif1	-0.125508	0.182053	0.602381	0.142356	0.138913	0.563036	-0.268329	0.00169842	0.0252237
ENSMUSG00000030374	Strn4	-0.0722493	0.388556	0.784249	0.17169	0.0456748	0.408203	-0.244909	0.00169821	0.0252237
ENSMUSG00000040390	Map3k10	-0.093516	0.397307	0.789398	0.237339	0.0362521	0.38285	-0.332774	0.00170352	0.0252765
ENSMUSG00000079243	Xirp1	1.29386	0.0828318	0.438284	-0.866878	0.199115	NA	2.18534	0.00170638	0.0252962
ENSMUSG00000031310	Zmym3	-0.125847	0.171191	0.58868	0.138208	0.142551	0.566003	-0.263516	0.00172362	0.0255288
ENSMUSG00000034394	Lif	0.496467	0.167794	0.58422	-0.532811	0.124477	NA	1.02622	0.00173405	0.0256371
ENSMUSG00000038555	Reep2	-0.0624177	0.412579	0.799861	0.153948	0.0482097	0.41623	-0.216371	0.00173302	0.0256371
ENSMUSG00000050947	Amigo1	-0.121504	0.0603806	0.376849	0.0744061	0.260825	0.676875	-0.197357	0.00173691	0.0256565
ENSMUSG00000041538	H2-Ob	0.926764	0.071046	0.40752	-0.663197	0.190292	NA	1.6162	0.00176073	0.0259385
ENSMUSG00000042303	Sgsm3	-0.0132602	0.840207	0.962795	0.174685	0.00911718	0.268293	-0.188648	0.00176017	0.0259385
ENSMUSG00000022354	Ndufb9	-0.171825	0.0408775	0.31086	0.0670864	0.434697	0.800921	-0.238417	0.00176612	0.0259947
ENSMUSG00000062127	Cttnbp2nl	0.298585	0.0247804	0.238034	-0.108224	0.423903	0.797064	0.409087	0.00177378	0.0260607
ENSMUSG00000058715	Fcer1g	0.740562	0.228645	0.662507	-1.00364	0.110229	NA	1.74322	0.00177536	0.0260607
ENSMUSG00000015461	Atf6b	0.0497663	0.538379	0.865981	0.28536	0.000560705	0.0892848	-0.237157	0.00177442	0.0260607
ENSMUSG00000027499	Pkia	-0.197576	0.0290463	0.261418	0.0594063	0.52215	0.847729	-0.257054	0.0017819	0.0261335
ENSMUSG00000096472	Cdkn2d	0.00897892	0.893845	0.977764	0.202135	0.00308446	0.17509	-0.194262	0.00178401	0.0261412
ENSMUSG00000057177	Gsk3a	-0.0542472	0.457765	0.826302	0.154213	0.0392751	0.394627	-0.209176	0.00179151	0.0262277
ENSMUSG00000029217	Tec	0.0181401	0.957639	0.990099	-0.933016	0.0056246	NA	0.957879	0.00179561	0.0262644
ENSMUSG00000035403	Crb2	0.546913	0.0341	0.281303	-0.192873	0.45779	NA	0.744534	0.00180514	0.0263569
ENSMUSG00000049044	Rapgef4	-0.235421	0.259989	0.694986	0.36418	0.089594	0.501889	-0.60147	0.00180492	0.0263569
ENSMUSG00000039001	Rps21	0.0674613	0.526327	0.859983	0.376147	0.000569343	0.0892848	-0.307349	0.00181296	0.0264476
ENSMUSG00000031304	Il2rg	0.985727	0.0795752	0.428004	-0.67319	0.228365	NA	1.68887	0.00181669	0.0264787
ENSMUSG00000026675	Hsd17b7	-0.302005	0.00205176	0.0602107	0.0221441	0.82502	0.955447	-0.327467	0.00182983	0.0266465
ENSMUSG00000043157	Arl11	1.07056	0.126839	0.523056	-0.937742	0.175097	NA	2.0177	0.0018334	0.026675
ENSMUSG00000044708	Kcnj10	0.329966	0.00770566	0.125098	-0.0539833	0.670529	0.906	0.386968	0.00183852	0.0267023
ENSMUSG00000008690	Ncaph2	-0.0308311	0.636242	0.904017	0.155029	0.019871	0.334279	-0.185264	0.00183696	0.0267023
ENSMUSG00000030688	Stard10	-0.229577	0.228693	0.662507	0.351396	0.0728943	0.471693	-0.578222	0.0018461	0.0267887
ENSMUSG00000074733	Zfp950	-0.0778177	0.661642	0.91124	0.450666	0.0135888	0.306888	-0.528093	0.00184936	0.0268125
ENSMUSG00000026471	Mr1	0.115146	0.602067	0.889041	-0.506882	0.0226621	NA	0.621297	0.00185512	0.0268722
ENSMUSG00000025486	Sirt3	-0.112439	0.257606	0.692836	0.169177	0.0958435	0.508429	-0.282592	0.00186018	0.0269219
ENSMUSG00000059049	Frem1	0.440418	0.373725	0.775976	-0.970261	0.0531555	NA	1.40886	0.00186606	0.0269834
ENSMUSG00000054404	Slfn5	0.471446	0.0797325	0.428004	-0.332448	0.221016	NA	0.814236	0.00187387	0.0270488
ENSMUSG00000062585	Cnr2	1.82829	0.0144076	0.177362	-0.444936	0.537197	NA	2.27194	0.00188444	0.0271774
ENSMUSG00000045045	Lrfn4	-0.0552821	0.578421	0.879892	0.224946	0.0269964	0.358839	-0.280677	0.0019347	0.027878
ENSMUSG00000009356	Lpo	1.52038	0.00495741	0.0971039	-0.0782778	0.880016	NA	1.60144	0.00195087	0.0280383
ENSMUSG00000064201	Krt2	-0.392739	0.179658	0.597657	0.436324	0.147988	NA	-0.827535	0.00195145	0.0280383
ENSMUSG00000026820	Ptges2	-0.107902	0.231611	0.665042	0.146868	0.110788	0.528589	-0.256143	0.00195264	0.0280383
ENSMUSG00000009378	Slc16a12	0.381058	0.456626	0.825569	-1.06045	0.0410797	NA	1.45991	0.00194782	0.0280383
ENSMUSG00000062210	Tnfaip8	0.111253	0.602908	0.88956	-0.511713	0.0175159	NA	0.629447	0.00196107	0.0281349
ENSMUSG00000034686	Prr7	0.0173465	0.914192	0.98315	0.473812	0.00412752	0.195826	-0.455951	0.00196922	0.0282272
ENSMUSG00000029735	Tpk1	0.672041	0.0205995	0.214811	-0.145108	0.604622	NA	0.82068	0.00197743	0.0283203
ENSMUSG00000057969	Sema3b	0.757191	0.266651	0.701326	-1.14978	0.0978125	NA	1.91411	0.00198112	0.0283485
ENSMUSG00000025189	Cnnm1	-0.14183	0.104136	0.48503	0.106468	0.233885	0.651117	-0.249113	0.0019889	0.028435
ENSMUSG00000066152	Slc31a2	0.371611	0.0114946	0.156363	-0.0529986	0.716752	NA	0.42916	0.00199621	0.0285012
ENSMUSG00000056427	Slit3	-0.246196	0.12945	0.527432	0.223045	0.180733	0.607166	-0.47158	0.00199872	0.0285012
ENSMUSG00000086284	Frmpd1os	2.41444	0.240372	0.676939	-3.25362	0.104846	NA	5.66645	0.00199728	0.0285012
ENSMUSG00000038375	Trp53inp2	0.241144	0.0220841	0.223185	-0.0610251	0.571386	0.867914	0.300841	0.00200767	0.0285793
ENSMUSG00000042189	Tekt3	3.30874	0.0462306	NA	-1.32853	0.337007	NA	4.59829	0.00200645	0.0285793
ENSMUSG00000022504	Ciita	0.351346	0.446645	0.820688	-0.917769	0.0405413	NA	1.26935	0.00201074	0.0285984
ENSMUSG00000020941	Map3k14	0.541983	0.0185225	0.203114	-0.124791	0.584544	NA	0.672472	0.00201889	0.0286647
ENSMUSG00000003469	Phyhip	-0.0441221	0.717365	0.930131	0.301142	0.0160739	0.318768	-0.345781	0.00201829	0.0286647
ENSMUSG00000007039	Ddah2	0.450083	0.023587	0.231261	-0.118235	0.553665	NA	0.57233	0.00202659	0.0286883
ENSMUSG00000054309	Cpsf3	0.0900172	0.218807	0.651062	-0.113239	0.123985	0.542586	0.203316	0.0020273	0.0286883
ENSMUSG00000036402	Gng12	0.100587	0.306124	0.732785	-0.186127	0.0633429	0.45145	0.288796	0.00202351	0.0286883
ENSMUSG00000027078	Ube2l6	0.70345	0.00410168	0.0881795	-0.0843047	0.730102	NA	0.808263	0.00203511	0.0287711
ENSMUSG00000022103	Gfra2	-0.533701	0.00156103	0.0507004	-0.0584046	0.735997	0.925975	-0.476441	0.00203801	0.0287726
ENSMUSG00000110086	Smim32	-1.12257	0.0258962	0.244861	0.359034	0.491372	NA	-1.45725	0.00203871	0.0287726
ENSMUSG00000047407	Tgif1	1.24437	0.00275364	0.0711734	-0.175232	0.665211	NA	1.41832	0.00204607	0.0288212
ENSMUSG00000021057	Akap5	-0.214769	0.11161	0.498112	0.171155	0.216537	0.637006	-0.385432	0.00204741	0.0288212
ENSMUSG00000033545	Znrf1	-0.0515638	0.570627	0.877674	0.214467	0.0212431	0.341173	-0.26434	0.00204713	0.0288212
ENSMUSG00000032562	Gnai2	0.2653	0.00247588	0.0673156	-0.00731494	0.935011	0.985462	0.275353	0.00205405	0.0288407
ENSMUSG00000060240	Cend1	-0.158161	0.0272631	0.251137	0.042198	0.565476	0.86687	-0.200709	0.00205365	0.0288407
ENSMUSG00000015290	Ubl4a	-0.123549	0.0361569	0.291388	0.0400728	0.504312	0.838085	-0.164259	0.00205214	0.0288407
ENSMUSG00000033910	Gucy1a1	-0.487394	0.00200541	0.0598286	0.0883755	0.585472	0.874372	-0.568493	0.00205672	0.0288527
ENSMUSG00000022565	Plec	-0.090966	0.403492	0.79262	0.215897	0.053252	0.428569	-0.306501	0.0020584	0.0288527
ENSMUSG00000024969	Mark2	-0.0976676	0.201866	0.629929	0.116006	0.138592	0.563027	-0.213875	0.00206446	0.028913
ENSMUSG00000015001	Oc90	3.93919	0.0336927	NA	-1.41263	0.38398	NA	5.63715	0.00206775	0.0289345
ENSMUSG00000001248	Gramd1a	-0.0281097	0.690876	0.919175	0.170849	0.0179964	0.322994	-0.198412	0.00206978	0.0289382
ENSMUSG00000020297	Nsg2	-0.0468514	0.418166	0.803677	0.119296	0.0444055	0.407826	-0.166964	0.00208422	0.0290661
ENSMUSG00000034158	Lrrc58	0.0357773	0.741153	0.934611	-0.270488	0.0145687	0.307907	0.307753	0.0020837	0.0290661
ENSMUSG00000026664	Phyh	-0.0170429	0.810005	0.953038	-0.227372	0.0015452	0.136846	0.208441	0.00208315	0.0290661
ENSMUSG00000054934	Kcnmb4	-0.405639	0.00358852	0.0823264	0.0246859	0.86312	NA	-0.433678	0.00209563	0.0292005
ENSMUSG00000025823	Pdia4	0.33363	0.062277	0.382447	-0.180358	0.324116	0.738533	0.520188	0.00212104	0.0294798
ENSMUSG00000043336	Filip1l	0.311953	0.337395	0.75544	-0.611848	0.0609432	NA	0.934613	0.00211961	0.0294798
ENSMUSG00000015599	Ttbk1	-0.114769	0.213981	0.64618	0.145502	0.124418	0.542586	-0.261313	0.00212583	0.0295214
ENSMUSG00000021451	Sema4d	0.23628	0.0198803	0.210809	-0.0491594	0.634672	0.894587	0.286525	0.00213544	0.0295597
ENSMUSG00000063065	Mapk3	-0.088327	0.322034	0.744222	0.165839	0.0697211	0.463931	-0.253083	0.00213576	0.0295597
ENSMUSG00000030638	Sh3gl3	-0.0559449	0.547375	0.869503	0.203092	0.0323722	0.376704	-0.25892	0.00213354	0.0295597
ENSMUSG00000038055	Dexi	-0.0552307	0.639422	0.905179	0.27518	0.0226647	0.344432	-0.329937	0.00213527	0.0295597
ENSMUSG00000005360	Slc1a3	0.150726	0.111645	0.498112	-0.131484	0.176037	0.603678	0.284759	0.00213956	0.0295873
ENSMUSG00000041939	Mvk	-0.0842153	0.441295	0.817609	0.22196	0.0468864	0.409771	-0.305609	0.00214238	0.0296015
ENSMUSG00000042873	Lhfpl4	-0.107852	0.106445	0.489978	0.0789678	0.248034	0.66738	-0.187211	0.00214426	0.0296026
ENSMUSG00000053166	Cdh22	-0.189058	0.318904	0.742203	0.344199	0.0772818	0.480509	-0.532467	0.0021585	0.0297743
ENSMUSG00000079298	Klrb1b	4.65242	0.0716678	0.409251	-2.53028	0.302396	NA	7.32016	0.00217487	0.029975
ENSMUSG00000021553	Slc28a3	2.81843	0.0285787	0.259155	-0.907725	0.436405	NA	3.73539	0.00219422	0.0301338
ENSMUSG00000031875	Cmtm3	0.470842	0.0805584	0.430178	-0.319762	0.241943	NA	0.797047	0.00219409	0.0301338
ENSMUSG00000076437	Selenoh	-0.281371	0.0837589	0.44029	0.174327	0.297081	NA	-0.456546	0.0021933	0.0301338
ENSMUSG00000034354	Mtmr3	-0.0612194	0.256592	0.692419	0.0880158	0.109854	0.528181	-0.149347	0.00219554	0.0301338
ENSMUSG00000020671	Rab10	0.0401102	0.45366	0.824464	-0.13097	0.0163394	0.318768	0.169113	0.00219286	0.0301338
ENSMUSG00000026811	St6galnac6	-0.130792	0.106504	0.490048	0.0970119	0.242365	0.661896	-0.228925	0.00220329	0.0301898
ENSMUSG00000021218	Gdi2	-0.0488392	0.468741	0.832471	-0.235849	0.000619435	0.0914589	0.186843	0.00220167	0.0301898
ENSMUSG00000037762	Slc16a9	0.478511	0.280576	0.712	-0.752516	0.0918685	NA	1.23867	0.00220601	0.030202
ENSMUSG00000066510	Ankdd1a	0.0864736	0.873976	0.97277	1.69149	0.00359693	NA	-1.60522	0.0022114	0.0302507
ENSMUSG00000027580	Helz2	0.370953	0.148045	0.556613	-0.350896	0.172569	NA	0.728415	0.00221598	0.0302881
ENSMUSG00000027684	Mecom	0.0426862	0.863997	0.969283	-0.642181	0.00905219	NA	0.681532	0.00221938	0.0303094
ENSMUSG00000055707	Klhl26	-0.0616703	0.54169	0.866579	0.221297	0.0325638	0.376704	-0.284108	0.00223054	0.0304366
ENSMUSG00000039958	Etfbkmt	0.0624658	0.785478	0.945608	-0.596022	0.00843166	NA	0.653578	0.00223665	0.0304947
ENSMUSG00000032349	Elovl5	0.21917	0.0530913	0.354258	-0.113822	0.325375	0.739952	0.335756	0.00224674	0.0305817
ENSMUSG00000059895	Ptp4a3	-0.138388	0.138857	0.542856	0.126871	0.184758	0.609319	-0.263947	0.00224529	0.0305817
ENSMUSG00000027287	Snap23	0.314509	0.0942212	0.465835	-0.217862	0.251219	NA	0.536197	0.00225337	0.0306466
ENSMUSG00000034402	Kcnh5	-0.656706	0.0121462	0.160786	0.0753232	0.780046	NA	-0.727474	0.00228048	0.0309897
ENSMUSG00000038390	Gpr162	-0.138802	0.18564	0.606632	0.154545	0.150821	0.579537	-0.294198	0.00228351	0.0310053
ENSMUSG00000044636	Csrnp2	-0.19366	0.130273	0.528455	0.161149	0.219188	0.639387	-0.355709	0.00228815	0.0310427
ENSMUSG00000020889	Nr1d1	-0.140568	0.135311	0.539098	0.121925	0.206187	0.630079	-0.262	0.00230007	0.0311276
ENSMUSG00000029120	Ppp2r2c	-0.123022	0.135853	0.539398	0.109218	0.19688	0.621223	-0.233027	0.0022994	0.0311276
ENSMUSG00000068196	Col8a1	0.810142	0.499039	0.849027	-2.52293	0.039261	NA	3.33242	0.00229675	0.0311276
ENSMUSG00000073889	Il11ra1	0.302152	0.00227879	0.0634329	0.0234524	0.813115	0.951089	0.280199	0.0023083	0.0312132
ENSMUSG00000024290	Rock1	0.127725	0.362771	0.769898	-0.26227	0.065827	0.458975	0.391857	0.00231493	0.0312772
ENSMUSG00000102037	Bcl2a1a	2.20861	0.0502859	0.344934	-0.955079	0.372852	NA	3.20437	0.0023185	0.0312998
ENSMUSG00000058488	Kl	1.20903	0.120688	0.513115	-0.944883	0.236961	0.654441	2.15337	0.00232087	0.031306
ENSMUSG00000024334	H2-Oa	1.13414	0.0852749	0.444623	-0.772724	0.219167	NA	1.90459	0.00233652	0.0314913
ENSMUSG00000028176	Lrrc7	-0.241239	0.0834937	0.439713	0.150851	0.291438	0.708274	-0.393032	0.00234878	0.0316308
ENSMUSG00000022914	Brwd1	-0.171046	0.0269814	0.249273	0.0570855	0.470718	0.823244	-0.229936	0.0023527	0.0316577
ENSMUSG00000030745	Il21r	0.770817	0.0490121	0.341972	-0.388943	0.318994	NA	1.17063	0.00235632	0.0316805
ENSMUSG00000057554	Lgals8	0.0462638	0.710488	0.926352	-0.310881	0.0139098	0.307695	0.35953	0.0023745	0.0318989
ENSMUSG00000032265	Tent5a	0.29321	0.334158	0.753164	-0.543022	0.0776287	NA	0.838537	0.00238513	0.0320097
ENSMUSG00000037993	Dhx38	-0.0615484	0.380598	0.781617	0.131372	0.0655891	0.458975	-0.193319	0.00238664	0.0320097
ENSMUSG00000063388	BC023105	2.83886	0.076925	NA	-1.69707	0.227273	NA	4.51612	0.0024131	0.0323383
ENSMUSG00000024339	Tap2	0.519658	0.0453302	0.330257	-0.206268	0.432357	NA	0.734011	0.00243026	0.0325084
ENSMUSG00000004933	Matk	0.0342038	0.760718	0.939965	0.344714	0.00276492	0.173826	-0.310644	0.00243172	0.0325084
ENSMUSG00000043439	Epop	-0.304669	0.126584	0.522939	0.25258	0.217454	0.63794	-0.555407	0.00243877	0.0325763
ENSMUSG00000025648	Pfkfb4	0.189961	0.309615	0.735541	-0.322888	0.0871401	NA	0.514371	0.00244575	0.032643
ENSMUSG00000083902	Tent2-ps1	1.20454	0.221137	0.653227	5.75186	4.24e-05	NA	-4.54481	0.00244984	0.0326711
ENSMUSG00000037242	Clic4	0.328378	0.020736	0.215378	-0.0760798	0.600644	0.880786	0.407809	0.00246242	0.0327594
ENSMUSG00000022014	Epsti1	1.01405	0.0921907	0.45943	-0.712746	0.230388	NA	1.77739	0.00245871	0.0327594
ENSMUSG00000052681	Rap1b	0.0509792	0.542486	0.866764	-0.179302	0.0351801	0.379182	0.229885	0.00246145	0.0327594
ENSMUSG00000042759	Apobr	0.862143	0.0541027	0.358442	-0.422182	0.334834	NA	1.29638	0.00247228	0.032864
ENSMUSG00000041642	Kif21b	-0.195163	0.0420639	0.31568	0.0688564	0.483759	0.828601	-0.263847	0.00249294	0.0331118
ENSMUSG00000028167	Bdh2	0.911416	0.00196663	0.0592982	0.0433973	0.88007	NA	0.885092	0.00249585	0.0331239
ENSMUSG00000034595	Ppp1r18	0.52851	0.0153549	0.183779	-0.0854204	0.695905	NA	0.619564	0.0025278	0.0334939
ENSMUSG00000040268	Plekha1	0.15868	0.0251926	0.24067	-0.0354852	0.622247	0.88758	0.194744	0.00252671	0.0334939
ENSMUSG00000045934	Mtmr11	0.392374	0.153839	0.565113	-0.358739	0.188485	NA	0.756203	0.00253301	0.0335359
ENSMUSG00000030323	Ift122	-0.294238	0.0477039	0.337232	0.114429	0.45297	0.813864	-0.408833	0.00253747	0.0335469
ENSMUSG00000000555	Itga5	0.573356	0.0789375	0.427329	-0.452332	0.166646	NA	1.033	0.00253791	0.0335469
ENSMUSG00000060166	Zdhhc8	-0.220397	0.0278371	0.25419	0.0694685	0.498766	0.836256	-0.291774	0.00255525	0.0337219
ENSMUSG00000057329	Bcl2	0.192515	0.197765	0.622987	-0.293691	0.0518184	0.422684	0.494245	0.00255502	0.0337219
ENSMUSG00000030811	Fbxl19	-0.048132	0.589102	0.88234	0.195912	0.0316031	0.376704	-0.244154	0.0025573	0.033722
ENSMUSG00000039377	Hlx	1.75147	0.00559636	0.104202	-0.0150907	0.979847	NA	1.7759	0.00255986	0.0337287
ENSMUSG00000022091	Sorbs3	0.409102	0.00742122	0.122735	-0.0488236	0.753349	0.931343	0.46437	0.00256595	0.0337819
ENSMUSG00000021087	Rtn1	-0.179502	0.0101428	0.147042	0.0360014	0.615303	0.885994	-0.217267	0.00257359	0.0338453
ENSMUSG00000004591	Pkn2	0.124109	0.267211	0.701882	-0.181092	0.108836	0.527394	0.304786	0.00257488	0.0338453
ENSMUSG00000024818	Slc25a45	0.571724	0.0107188	0.151753	-0.0833116	0.704493	NA	0.663864	0.00258909	0.034005
ENSMUSG00000030361	Klrb1a	5.24939	0.00610318	0.10999	-0.450784	0.789728	NA	5.71053	0.00260228	0.0341511
ENSMUSG00000024901	Peli3	0.0306713	0.726152	0.932064	0.271097	0.00237328	0.165933	-0.240119	0.00260888	0.0342104
ENSMUSG00000001794	Capns1	0.182755	0.0269243	0.248891	-0.0431698	0.608916	0.884143	0.22647	0.00262862	0.0343325
ENSMUSG00000019873	Reep3	0.205064	0.0666808	0.395277	-0.116472	0.306312	0.721957	0.323765	0.00262129	0.0343325
ENSMUSG00000037552	Plekhg2	0.279764	0.204929	0.633825	-0.356807	0.10506	NA	0.641641	0.00262408	0.0343325
ENSMUSG00000058441	Panx2	-0.116734	0.215501	0.647598	0.154878	0.108938	0.527612	-0.273972	0.00262691	0.0343325
ENSMUSG00000030410	Dmwd	-0.0815238	0.374186	0.775976	0.172547	0.0664831	0.460038	-0.254768	0.00262547	0.0343325
ENSMUSG00000020163	Uqcr11	-0.0206649	0.845762	0.964066	0.270071	0.01305	0.306888	-0.291534	0.00263136	0.0343411
ENSMUSG00000049288	Lix1l	0.239653	0.0307705	0.268197	-0.062973	0.575688	0.86957	0.303144	0.00265096	0.0345587
ENSMUSG00000037032	Apbb1	-0.123246	0.0428614	0.318924	0.0539105	0.387473	0.778398	-0.178656	0.00265433	0.0345587
ENSMUSG00000022309	Angpt1	0.419578	0.165353	0.580934	-0.471584	0.125012	NA	0.894585	0.00265236	0.0345587
ENSMUSG00000024048	Myl12a	0.250825	0.40192	0.791704	-0.56475	0.0624467	NA	0.815317	0.00266218	0.0346177
ENSMUSG00000019802	Sec63	-0.00814178	0.881372	0.974597	-0.155389	0.00489429	0.206038	0.147283	0.00266306	0.0346177
ENSMUSG00000023031	Cela1	0.861877	0.0364082	0.292217	-0.289451	0.48196	NA	1.15868	0.00267676	0.0347684
ENSMUSG00000033792	Atp7a	0.281647	0.213863	0.646085	-0.34204	0.134512	NA	0.629941	0.00268049	0.0347893
ENSMUSG00000021190	Lgmn	0.382184	0.00817175	0.129932	-0.0409903	0.781749	0.942166	0.426197	0.00268959	0.0348603
ENSMUSG00000020422	Tns3	0.306585	0.0109204	0.153115	-0.0382987	0.755866	0.931882	0.348312	0.00270591	0.0350364
ENSMUSG00000021156	Zmynd11	-0.127335	0.013862	0.173655	0.0130567	0.805006	0.949653	-0.1408	0.00271562	0.0350794
ENSMUSG00000056820	Tsnax	-0.161781	0.0186922	0.204231	0.0288599	0.682097	0.910801	-0.191404	0.00271367	0.0350794
ENSMUSG00000020019	Ntn4	0.513425	0.0610712	0.379104	-0.289203	0.298605	NA	0.806385	0.00271331	0.0350794
ENSMUSG00000036718	Micall2	0.693532	0.0143776	0.17735	-0.0985439	0.722579	NA	0.798076	0.00273658	0.0352698
ENSMUSG00000037411	Serpine1	0.97132	0.0187206	0.204301	-0.379657	0.353255	NA	1.38912	0.00273679	0.0352698
ENSMUSG00000022574	Naprt	0.654542	0.0067365	0.115952	-0.032503	0.893901	NA	0.692202	0.00274727	0.0353773
ENSMUSG00000015247	Nipsnap3b	0.297212	0.0347229	0.284203	-0.0996427	0.481087	0.828296	0.400639	0.00275364	0.0354039
ENSMUSG00000032006	Pdgfd	0.104316	0.68426	0.9182	-0.60274	0.019526	NA	0.700495	0.0027722	0.0356148
ENSMUSG00000050931	Sgms2	0.359739	0.401074	0.791241	-0.810435	0.0626974	NA	1.17151	0.00277527	0.0356264
ENSMUSG00000039682	Lap3	0.240072	0.0845833	0.442191	-0.150566	0.28958	0.706201	0.392688	0.00277962	0.0356544
ENSMUSG00000036561	Ppp6r2	-0.063013	0.387863	0.783958	0.138314	0.0638729	0.452709	-0.202328	0.00279569	0.0358327
ENSMUSG00000013523	Bcas1	0.618091	0.00237484	0.0654748	0.0600702	0.773272	0.938216	0.557576	0.00280288	0.035872
ENSMUSG00000050511	Oprd1	-0.221007	0.110357	0.497742	0.185734	0.190604	0.614145	-0.401814	0.00280311	0.035872
ENSMUSG00000032816	Igdcc4	0.239139	0.0147427	0.179029	-0.0572172	0.566786	0.867009	0.299685	0.00280612	0.0358826
ENSMUSG00000023473	Celsr3	-0.140555	0.411816	0.799468	0.330563	0.0600408	0.445352	-0.470291	0.0028107	0.0359133
ENSMUSG00000037062	Sh3glb1	0.149104	0.0788935	0.427329	-0.0854445	0.322285	0.737251	0.235952	0.00282235	0.0360115
ENSMUSG00000032116	Stt3a	0.0765842	0.449141	0.821988	-0.197456	0.0549614	0.431076	0.274946	0.00282276	0.0360115
ENSMUSG00000031378	Abcd1	0.253707	0.0450503	0.32913	-0.126957	0.315618	0.731367	0.385916	0.00282839	0.0360554
ENSMUSG00000029096	Htra3	0.0883815	0.684941	0.918534	-0.495025	0.023369	NA	0.582827	0.00283884	0.0361606
ENSMUSG00000052428	Tmco1	0.127436	0.126353	0.522811	-0.105548	0.209423	0.63294	0.234728	0.00284589	0.0362225
ENSMUSG00000022075	Rhobtb2	-0.2239	0.0409395	0.311105	0.075954	0.498843	0.836256	-0.299059	0.00287869	0.0366116
ENSMUSG00000054693	Adam10	0.0555059	0.39409	0.787242	-0.119013	0.0723834	0.470366	0.174769	0.00291627	0.0370609
ENSMUSG00000033065	Pfkm	-0.0759628	0.118345	0.508837	0.0543211	0.275338	0.691124	-0.130507	0.00293073	0.037216
ENSMUSG00000031610	Scrg1	0.249997	0.151219	0.561599	-0.221156	0.211794	0.633346	0.471817	0.00293829	0.0372832
ENSMUSG00000031665	Sall1	0.35876	0.0116508	0.157431	-0.0462798	0.748516	0.931028	0.409206	0.00294367	0.0373227
ENSMUSG00000001521	Tulp3	0.272279	0.00496068	0.0971039	-0.0311187	0.747114	0.930951	0.30593	0.0029586	0.0374552
ENSMUSG00000021285	Ppp1r13b	0.016449	0.885206	0.975527	0.327176	0.00511064	0.207528	-0.311519	0.00295867	0.0374552
ENSMUSG00000027878	Notch2	0.275049	0.103884	0.484983	-0.189981	0.270419	0.686528	0.468573	0.00296701	0.0375286
ENSMUSG00000026781	Acbd5	0.0928784	0.116913	0.506485	-0.0657079	0.273561	0.688956	0.158946	0.0029796	0.0375286
ENSMUSG00000027931	Npr1	0.378577	0.134108	0.537043	-0.303423	0.23075	NA	0.680754	0.00297893	0.0375286
ENSMUSG00000034685	Fam171a2	-0.187768	0.140022	0.543858	0.157597	0.227261	0.646833	-0.346092	0.00297606	0.0375286
ENSMUSG00000056880	Gadl1	0.495408	0.312818	0.737898	-0.823949	0.0900843	NA	1.32211	0.00298042	0.0375286
ENSMUSG00000020122	Egfr	0.0838668	0.562506	0.874683	-0.32799	0.0249335	0.34709	0.416705	0.00297563	0.0375286
ENSMUSG00000052353	Cemip	-0.516243	0.00175728	0.0545754	-0.027344	0.871741	0.969015	-0.496885	0.00299355	0.0376365
ENSMUSG00000038740	Mvb12b	-0.0526978	0.262311	0.697491	0.0729948	0.127547	0.5476	-0.125482	0.00299252	0.0376365
ENSMUSG00000015202	Cnksr3	0.444084	0.0788844	0.427329	-0.263184	0.300399	NA	0.719625	0.0030077	0.0377336
ENSMUSG00000035885	Cox8a	-0.102017	0.162894	0.578246	0.0968921	0.196034	0.620885	-0.199605	0.00300815	0.0377336
ENSMUSG00000003273	Car11	0.0354946	0.773071	0.94314	0.375731	0.0029208	0.174106	-0.339595	0.00300488	0.0377336
ENSMUSG00000031765	Mt1	0.453302	0.0965942	0.469381	-0.30385	0.277627	0.692005	0.760475	0.00301503	0.0377911
ENSMUSG00000003363	Pld3	-0.0518198	0.474703	0.834448	0.145043	0.0510949	0.42088	-0.197434	0.00304952	0.0381944
ENSMUSG00000036169	Sostdc1	1.46255	0.135607	0.539374	-1.198	0.231018	NA	2.6612	0.00305392	0.0382204
ENSMUSG00000024810	Il33	0.423701	0.0232227	0.229381	-0.0951005	0.618803	0.886633	0.522538	0.00306735	0.0383593
ENSMUSG00000006498	Ptbp1	0.202344	0.151424	0.561631	-0.197612	0.167109	0.59744	0.40571	0.00307205	0.038389
ENSMUSG00000030806	Stx1b	-0.200798	0.00258465	0.0694321	-0.00841335	0.902028	0.975206	-0.194131	0.00309288	0.0385982
ENSMUSG00000006360	Crip1	0.564719	0.0781491	0.42629	-0.34806	0.273354	NA	0.927368	0.00310022	0.0385982
ENSMUSG00000067818	Myl9	0.439297	0.177184	0.595359	-0.443168	0.180543	NA	0.895711	0.00310051	0.0385982
ENSMUSG00000022390	Zc3h7b	-0.0732555	0.295569	0.724645	0.11964	0.0954039	0.508429	-0.191811	0.00309706	0.0385982
ENSMUSG00000047786	Lix1	0.186836	0.136952	0.540286	-0.154994	0.226311	0.646226	0.343624	0.00310913	0.0386762
ENSMUSG00000040327	Cul9	-0.0327342	0.734275	0.933736	0.226507	0.0218527	0.343652	-0.259203	0.00311238	0.0386875
ENSMUSG00000049728	Zfp668	-0.0784009	0.543425	0.866764	0.267725	0.0425422	0.403303	-0.347396	0.00311716	0.0387177
ENSMUSG00000000197	Nalcn	-0.264515	0.00156331	0.0507004	-0.03773	0.659739	0.903735	-0.22756	0.00313223	0.0388462
ENSMUSG00000026483	Niban1	0.263287	0.365054	0.771713	-0.566136	0.0535699	NA	0.846053	0.00313111	0.0388462
ENSMUSG00000021848	Otx2	1.78156	0.229483	0.66311	-2.22616	0.139705	NA	4.01301	0.00314087	0.038924
ENSMUSG00000060981	H4c8	1.30881	0.0155523	0.1845	-0.142557	0.782143	NA	1.45814	0.00316444	0.0391867
ENSMUSG00000046743	Fat4	-0.412569	0.0353789	0.288041	0.18985	0.345826	0.753299	-0.607489	0.00317654	0.039307
ENSMUSG00000019578	Ubxn6	-0.201753	0.105939	0.489079	0.14336	0.261416	0.677512	-0.348244	0.00318248	0.039351
ENSMUSG00000063415	Cyp26b1	0.772195	0.00623703	0.111712	-0.0289889	0.919525	0.981828	0.793114	0.00318565	0.0393606
ENSMUSG00000024778	Fas	0.15618	0.678693	0.916628	-0.851429	0.0235243	NA	1.0138	0.00319904	0.0394964
ENSMUSG00000035397	Klf16	-0.0718711	0.552816	0.870707	0.256954	0.0383636	0.391197	-0.329876	0.00320962	0.0395974
ENSMUSG00000090071	Cdk5r2	-0.0797824	0.524997	0.859301	0.261963	0.0419525	0.40291	-0.342842	0.00322374	0.0397418
ENSMUSG00000026839	Upp2	-0.201215	0.102034	0.480943	0.127409	0.311899	0.727707	-0.329315	0.00324769	0.040007
ENSMUSG00000031483	Erlin2	0.180643	0.0723305	0.411542	-0.0961712	0.348056	0.75547	0.278686	0.00326439	0.0401524
ENSMUSG00000035578	Iqcg	0.354514	0.189167	0.612183	-0.380338	0.157355	NA	0.744386	0.00326525	0.0401524
ENSMUSG00000040649	Rimklb	0.135496	0.234959	0.668694	-0.169586	0.142423	0.565739	0.30407	0.0032668	0.0401524
ENSMUSG00000000154	Slc22a18	0.864807	0.0576139	0.369854	-0.377103	0.376561	NA	1.26388	0.00327821	0.0402625
ENSMUSG00000025511	Tspan4	0.504868	0.00911112	0.137568	-0.0576217	0.769181	0.936519	0.573407	0.00330192	0.0404828
ENSMUSG00000029304	Spp1	0.783924	0.303012	0.730342	-1.34571	0.0845489	0.495391	2.15173	0.003302	0.0404828
ENSMUSG00000028423	Nfx1	-0.0365777	0.671146	0.914862	0.199176	0.0239486	0.344515	-0.235012	0.00331644	0.040611
ENSMUSG00000027763	Mbnl1	0.0851668	0.408697	0.796855	-0.190358	0.0705413	0.465883	0.276569	0.00332169	0.040625
ENSMUSG00000021280	Exoc3l4	0.321204	0.410969	0.798764	-0.723469	0.0589043	NA	1.05089	0.00332499	0.040625
ENSMUSG00000031787	Katnb1	0.0311995	0.704212	0.924288	0.251033	0.00275134	0.173826	-0.219574	0.00332374	0.040625
ENSMUSG00000030230	Plcz1	0.520278	0.147725	0.55618	-0.433314	0.20265	NA	0.948036	0.00333866	0.0407618
ENSMUSG00000078612	Fyb2	0.281966	0.370869	0.773707	-0.604524	0.0511961	NA	0.873537	0.00335499	0.0409308
ENSMUSG00000035158	Mitf	0.473659	0.00217004	0.0618361	0.0107796	0.944478	NA	0.468489	0.00336474	0.0410195
ENSMUSG00000029298	Gbp9	0.655049	0.073298	0.413884	-0.335987	0.359949	NA	1.01157	0.00337323	0.0410925
ENSMUSG00000060152	Pop5	-0.147471	0.163519	0.579059	0.135927	0.209437	0.63294	-0.284523	0.00338671	0.0412263
ENSMUSG00000021061	Sptb	-0.0443377	0.731225	0.93287	0.30821	0.0199739	0.334279	-0.353473	0.00339627	0.041312
ENSMUSG00000037270	Bltp1	-0.253306	0.00557665	0.104082	-0.00371617	0.968355	0.994852	-0.250647	0.00341008	0.0414494
ENSMUSG00000028012	Rrh	2.41531	0.0434212	0.321172	-0.854566	0.437728	NA	3.27641	0.00341765	0.0415108
ENSMUSG00000059883	Irak4	0.643758	0.0405559	0.309687	-0.2052	0.509549	NA	0.853133	0.00342654	0.0415881
ENSMUSG00000026425	Srgap2	0.0596894	0.339737	0.756047	-0.106981	0.0911116	0.504869	0.165976	0.00343631	0.0416453
ENSMUSG00000022557	Bop1	-0.0259592	0.77056	0.942949	0.214384	0.0184498	0.325762	-0.241574	0.00343493	0.0416453
ENSMUSG00000024858	Grk2	-0.19497	0.00205747	0.0602107	-0.00474697	0.941604	0.987656	-0.19255	0.00346077	0.0418651
ENSMUSG00000062078	Qki	0.207864	0.0325824	0.276775	-0.0605998	0.543205	0.85935	0.270467	0.00346207	0.0418651
ENSMUSG00000030249	Abcc9	0.208772	0.216865	0.649972	-0.238552	0.159648	NA	0.448378	0.00345862	0.0418651
ENSMUSG00000022016	Akap11	-0.171594	0.0597103	0.375741	0.0744207	0.426027	0.797804	-0.246714	0.003484	0.0420994
ENSMUSG00000023913	Pla2g7	0.139391	0.337807	0.75544	-0.250484	0.0927356	0.505444	0.390588	0.00350233	0.0422899
ENSMUSG00000032036	Kirrel3	-0.273166	0.0228587	0.227864	0.0463573	0.706335	0.919758	-0.320064	0.00352108	0.0424852
ENSMUSG00000023905	Tnfrsf12a	0.577705	0.0484934	0.340267	-0.221932	0.448787	NA	0.80729	0.00353747	0.0426449
ENSMUSG00000044345	Marveld1	0.242894	0.161489	0.575726	-0.217658	0.212039	NA	0.462461	0.0035395	0.0426449
ENSMUSG00000020111	Micu1	-0.0400356	0.506681	0.852101	0.120291	0.0504944	0.42088	-0.15984	0.00354998	0.0427087
ENSMUSG00000022191	Drosha	-0.161535	0.00592536	0.10815	-0.00054784	0.992703	0.999532	-0.162159	0.00356256	0.0427975
ENSMUSG00000012428	Steap4	2.03439	0.0309246	0.268279	-0.548145	0.544857	NA	2.64228	0.00356015	0.0427975
ENSMUSG00000027423	Snx5	0.217277	0.0458758	0.33223	-0.0796026	0.473697	0.823823	0.298674	0.00357058	0.0428626
ENSMUSG00000022500	Litaf	0.471016	0.0252187	0.240773	-0.105436	0.623048	0.887655	0.578505	0.00359502	0.043007
ENSMUSG00000085208	Brip1os	0.286817	0.144816	0.550505	-0.233689	0.240708	0.659499	0.5235	0.00358927	0.043007
ENSMUSG00000039323	Igfbp2	0.419088	0.461171	0.827861	-1.08479	0.0628572	0.45131	1.50005	0.00359211	0.043007
ENSMUSG00000023236	Scg5	0.0632867	0.836312	0.961293	0.913584	0.00366844	0.180491	-0.847412	0.00358805	0.043007
ENSMUSG00000003617	Cp	0.0385013	0.904222	0.979382	-0.808673	0.0134019	0.306888	0.852366	0.00359567	0.043007
ENSMUSG00000023965	Fbxl17	-0.224056	0.00312832	0.0766952	0.00581593	0.94018	0.987433	-0.233303	0.00364062	0.0434815
ENSMUSG00000028607	Cpt2	0.596859	0.0373442	0.295203	-0.180917	0.532384	NA	0.784524	0.00363932	0.0434815
ENSMUSG00000060594	Layn	0.0514921	0.800916	0.951126	-0.547922	0.00674849	NA	0.592603	0.00366636	0.0437255
ENSMUSG00000062031	Pgghg	0.242691	0.275734	0.708663	-0.344088	0.124494	NA	0.585274	0.00368113	0.0438548
ENSMUSG00000043857	Mgat5b	-0.0859763	0.351517	0.764815	0.203747	0.0311096	0.376704	-0.285817	0.00368519	0.0438548
ENSMUSG00000020326	Ccng1	-0.0576432	0.633796	0.902347	-0.378565	0.00222279	0.165933	0.32045	0.00368424	0.0438548
ENSMUSG00000046574	Prr12	-0.0284829	0.739135	0.934474	0.197157	0.0242983	0.344515	-0.226027	0.00369422	0.0439305
ENSMUSG00000026649	Cfap126	0.357773	0.453463	0.824464	-0.903383	0.0578732	NA	1.25785	0.00370627	0.0440304
ENSMUSG00000044250	Pced1b	-0.0645165	0.730833	0.932807	0.439798	0.0224858	NA	-0.501752	0.00370797	0.0440304
ENSMUSG00000064210	Ano6	0.167061	0.221983	0.654495	-0.197059	0.155934	0.584217	0.366773	0.00371563	0.0440897
ENSMUSG00000009030	Pdcl	-0.00788252	0.929056	0.985725	-0.251541	0.00464645	0.199942	0.241253	0.00372757	0.0441994
ENSMUSG00000022619	Mapk8ip2	-0.0918703	0.31583	0.73943	0.157816	0.0930541	0.505444	-0.25109	0.00373302	0.0442323
ENSMUSG00000021248	Tmed10	0.0352751	0.634884	0.903324	-0.160037	0.0349848	0.379182	0.195803	0.00373762	0.0442538
ENSMUSG00000026259	Ngef	-0.257407	0.0960365	0.468554	0.219596	0.166582	0.597375	-0.474979	0.00374306	0.0442558
ENSMUSG00000024378	Stard4	-0.43823	0.0402412	0.307737	0.131346	0.54939	0.86187	-0.574836	0.00376724	0.0443823
ENSMUSG00000025190	Got1	-0.142501	0.0501235	0.344421	0.0510225	0.493948	0.833919	-0.194102	0.00376362	0.0443823
ENSMUSG00000036553	Sh3tc1	0.708513	0.0545256	0.360039	-0.316985	0.387054	NA	1.0317	0.00376322	0.0443823
ENSMUSG00000026383	Epb41l5	0.338768	0.125503	0.52127	-0.242814	0.2756	NA	0.58215	0.00376608	0.0443823
ENSMUSG00000023266	Frs3	-0.00795832	0.944666	0.988894	0.295148	0.0116652	0.298828	-0.303399	0.00375819	0.0443823
ENSMUSG00000038664	Herc1	-0.176031	0.04286	0.318924	0.058516	0.511468	0.843412	-0.235602	0.00382088	0.0448538
ENSMUSG00000018547	Pip4k2b	-0.0959702	0.149894	0.56016	0.0795963	0.243431	0.662471	-0.176141	0.00381317	0.0448538
ENSMUSG00000029201	Ugdh	0.124322	0.357573	0.767248	-0.23123	0.0912551	0.504869	0.357192	0.00382016	0.0448538
ENSMUSG00000046223	Plaur	0.201522	0.717871	0.930292	-1.26173	0.0224915	NA	1.46673	0.00381856	0.0448538
ENSMUSG00000118668	Rps6ka4	0.0254685	0.735867	0.933736	0.242143	0.00163135	0.143112	-0.214094	0.00381416	0.0448538
ENSMUSG00000029343	Crybb1	-0.904928	0.0650352	0.392032	0.416249	0.412367	NA	-1.3266	0.00382587	0.0448674
ENSMUSG00000039092	Sptlc3	1.39788	0.285992	0.715462	-2.18691	0.0795618	NA	3.55506	0.00383158	0.0448674
ENSMUSG00000022150	Dab2	0.23922	0.515124	0.855915	-0.729059	0.0516156	NA	0.974044	0.00383201	0.0448674
ENSMUSG00000023943	Sult1c1	3.67624	0.116136	NA	-2.26425	0.299501	NA	6.11915	0.00383342	0.0448674
ENSMUSG00000027239	Mdk	0.508029	0.00656961	0.114319	-0.00768783	0.967454	NA	0.522492	0.00384311	0.0448908
ENSMUSG00000031805	Jak3	0.432135	0.0279732	0.254927	-0.129901	0.508573	NA	0.570525	0.00384152	0.0448908
ENSMUSG00000038168	P3h2	0.569107	0.0646145	0.391255	-0.243229	0.425875	NA	0.81226	0.00384782	0.044914
ENSMUSG00000036928	Stag3	1.53533	0.00472467	0.0953934	0.00105075	0.998335	NA	1.54844	0.00386625	0.0450653
ENSMUSG00000002249	Tead3	0.729095	0.0068681	0.117492	-0.078525	0.765177	NA	0.821707	0.00386957	0.045072
ENSMUSG00000020799	Tekt1	0.943422	0.0329694	0.278172	-0.227584	0.604857	NA	1.16941	0.00392115	0.045544
ENSMUSG00000106847	Peg13	-0.110417	0.15627	0.568353	0.0941435	0.238342	0.655025	-0.204237	0.00392062	0.045544
ENSMUSG00000027828	Ssr3	0.0591371	0.293883	0.723506	-0.0900757	0.116307	0.535925	0.149895	0.00391297	0.045544
ENSMUSG00000048677	Tpcn2	0.175861	0.572179	0.877851	-0.62962	0.0416634	NA	0.804952	0.00392085	0.045544
ENSMUSG00000005803	Sqor	0.522331	0.028875	0.260489	-0.122883	0.608972	NA	0.650944	0.00393837	0.0457117
ENSMUSG00000028756	Pink1	-0.0388451	0.603775	0.889816	0.206614	0.00711647	0.245129	-0.241687	0.00394948	0.0458084
ENSMUSG00000044986	Tst	0.417472	0.0221651	0.223482	-0.0839375	0.651649	0.901569	0.505582	0.00398896	0.0462273
ENSMUSG00000026142	Rhbdd1	0.620078	0.0390447	0.301185	-0.178998	0.556817	NA	0.80079	0.00399121	0.0462273
ENSMUSG00000033805	Ephx4	-0.24569	0.0222098	0.223482	0.0401744	0.714803	0.922679	-0.28738	0.00399873	0.0462819
ENSMUSG00000033712	Ccar2	-0.100719	0.0610839	0.379104	0.0417896	0.445016	0.810468	-0.143449	0.00401158	0.046398
ENSMUSG00000012350	Ehf	2.64243	0.106714	NA	-1.62526	0.266486	NA	4.25394	0.00403585	0.0466459
ENSMUSG00000037318	Traf3ip3	1.53632	0.00409137	0.0881795	0.0909918	0.852854	NA	1.43195	0.00404195	0.0466837
ENSMUSG00000031818	Cox4i1	-0.093725	0.231661	0.665061	0.112625	0.161077	0.591044	-0.205772	0.00407942	0.0470834
ENSMUSG00000003531	Dgcr6	-0.138815	0.173643	0.590778	0.128212	0.219208	0.639387	-0.268028	0.00409571	0.0472384
ENSMUSG00000078502	Zfp268	1.55541	0.127868	0.524796	-1.09913	0.215222	NA	2.6591	0.0041079	0.0473126
ENSMUSG00000016024	Lbp	1.31571	0.140501	0.544623	-1.03366	0.256998	NA	2.33803	0.00412107	0.0474312
ENSMUSG00000011884	Gltp	0.562829	0.00412644	0.0883475	0.0185462	0.926266	0.983933	0.547789	0.00412442	0.0474365
ENSMUSG00000070427	Il18bp	0.315413	0.247824	0.683731	-0.388427	0.146283	NA	0.708399	0.00413173	0.0474875
ENSMUSG00000036882	Arhgap33	-0.223002	0.187246	0.608731	0.247851	0.153289	0.580388	-0.46855	0.00414667	0.0476066
ENSMUSG00000035498	Cdcp1	-0.858658	0.389979	0.784904	2.34099	0.0479138	NA	-3.12936	0.00414787	0.0476066
ENSMUSG00000028015	Ctso	0.164552	0.184701	0.604957	-0.172712	0.171358	0.60111	0.340433	0.00415585	0.0476394
ENSMUSG00000094772	Rpl29-ps2	-0.848964	0.339249	0.755934	1.82935	0.0663551	NA	-2.62245	0.00415651	0.0476394
ENSMUSG00000063268	Parp10	0.666523	0.0263984	0.246789	-0.164254	0.583621	NA	0.843384	0.00416023	0.0476489
ENSMUSG00000026200	Glb1l	0.482645	0.0418063	0.314716	-0.153243	0.518679	NA	0.644174	0.00417384	0.0477715
ENSMUSG00000001403	Ube2c	2.42315	0.00708753	0.119365	0.0324607	0.965144	NA	2.41108	0.00418424	0.047824
ENSMUSG00000050141	Fam205c	-0.421123	0.0257584	0.243852	0.0759452	0.69545	NA	-0.50195	0.00418246	0.047824
ENSMUSG00000020135	Apc2	-0.0610908	0.48364	0.840381	0.171964	0.0544139	0.430122	-0.232009	0.00419452	0.0479082
ENSMUSG00000038843	Gcnt1	0.306182	0.110355	0.497742	-0.222516	0.242329	NA	0.538002	0.00420093	0.0479482
ENSMUSG00000086859	Snhg20	-0.108453	0.602104	0.889041	0.445633	0.0376795	NA	-0.553507	0.00420576	0.0479701
ENSMUSG00000105096	Gbp10	0.000808201	0.999469	NA	-3.01402	0.00954944	NA	3.24721	0.0042102	0.0479807
ENSMUSG00000090675	Or5v1b	3.82231	0.0231441	NA	-1.00368	0.47729	NA	4.84178	0.00421251	0.0479807
ENSMUSG00000035242	Oaz1	0.0264823	0.691294	0.919175	0.199345	0.003518	0.178397	-0.172835	0.00423105	0.0481585
ENSMUSG00000038895	Zfp653	-0.0261722	0.845927	0.964066	0.32514	0.0182475	NA	-0.351357	0.004236	0.0481816
ENSMUSG00000026185	Igfbp5	0.401827	0.0372807	0.295203	-0.156015	0.430474	0.798412	0.56756	0.00426943	0.0485019
ENSMUSG00000037787	Coa8	-0.135642	0.225701	0.660009	0.156106	0.172343	0.601809	-0.291154	0.00427005	0.0485019
ENSMUSG00000042626	Shc1	0.284664	0.135552	0.539291	-0.252775	0.189376	NA	0.548765	0.0043133	0.0489257
ENSMUSG00000037669	Ldah	0.0954993	0.155027	0.566096	-0.0779189	0.247522	0.666389	0.173003	0.0043173	0.0489283
ENSMUSG00000028100	Nudt17	-0.115133	0.435356	0.814479	0.277227	0.0665103	NA	-0.397027	0.00431947	0.0489283
ENSMUSG00000044703	Phf11a	4.05553	0.021077	NA	-0.726761	0.631671	NA	4.78768	0.00433226	0.0490394
ENSMUSG00000048779	P2ry6	0.730961	0.0317522	0.272224	-0.167438	0.627162	NA	0.901024	0.0043749	0.0494202
ENSMUSG00000004032	Gstm5	-0.089478	0.272004	0.706185	0.170698	0.0407454	0.400096	-0.263673	0.00437189	0.0494202
ENSMUSG00000015087	Rabl6	0.00809501	0.884602	0.975408	0.151896	0.00765565	0.252446	-0.143702	0.00437261	0.0494202
ENSMUSG00000052373	Mpp3	-0.182145	0.282981	0.714271	0.267288	0.124763	0.542586	-0.450821	0.00438737	0.0495271
ENSMUSG00000037649	H2-DMa	0.244962	0.0842103	0.441563	-0.123962	0.384461	0.776399	0.370733	0.00439457	0.049567
ENSMUSG00000031723	Txnl4b	-0.171943	0.0898341	0.454987	0.101246	0.326932	0.741515	-0.276127	0.00439692	0.049567
ENSMUSG00000017765	Slc12a4	0.397474	0.0158906	0.186359	-0.0402599	0.809989	0.95008	0.441105	0.00440898	0.0495771
ENSMUSG00000031700	Gpt2	0.336133	0.0158421	0.186359	-0.0308855	0.828429	0.95554	0.369926	0.00440986	0.0495771
ENSMUSG00000004270	Lpcat3	0.142709	0.214044	0.646246	-0.154519	0.180525	0.607125	0.299022	0.00440869	0.0495771
ENSMUSG00000013419	Zfp651	-0.0777137	0.38941	0.784712	0.155654	0.0922913	0.505444	-0.233468	0.00440595	0.0495771
ENSMUSG00000037148	Arhgap10	-0.364433	0.101335	0.479097	0.260237	0.255263	NA	-0.621575	0.00441977	0.0496428
ENSMUSG00000062082	Cd200r4	0.832264	0.61234	0.894967	-3.45844	0.0306669	NA	4.71228	0.00442174	0.0496428
ENSMUSG00000056770	Setd3	-0.00672455	0.911533	0.982627	0.151898	0.0140828	0.307726	-0.158004	0.00444113	0.0498266
ENSMUSG00000027882	Stxbp3	0.316718	0.0407169	0.310464	-0.0903408	0.565314	0.86687	0.4095	0.00444685	0.0498568
ENSMUSG00000034912	Mdga2	-0.103883	0.141612	0.545912	0.0817129	0.256125	0.672609	-0.184636	0.00445289	0.0498704
ENSMUSG00000043088	Il17re	0.207701	0.829579	0.958732	-2.34492	0.0124528	NA	2.47239	0.00445412	0.0498704
